# Supplementary material for: Studies on the [4 + 2] cycloaddition and allylic substitution of indole-fused zwitterionic π-allylpalladium
Source: Royal Society of Chemistry journal article supplement (doi:10.1039/d3ob01451g), 2023-01-01
Supplement: d3ob01451g1.pdf [file d3ob01451g1.pdf]

Supporting Information

**Studies on the [4+2] Cycloaddition and Allylic Substitution of  
Indole-fused Zwitterionic  $\pi$ -Allylpalladium**

Zhengyu Han,<sup>1,2</sup> Yu Xue,<sup>1</sup> Xiang Li,<sup>1</sup> Xinzhe Hu,<sup>1</sup> Xiu-Qin Dong,<sup>4</sup> Jianwei Sun,<sup>3</sup> Hai  
Huang<sup>1,\*</sup>

<sup>1</sup> *Jiangsu Key Laboratory of Advanced Catalytic Materials & Technology, School of Petrochemical  
Engineering, Changzhou University, Changzhou 213164, China*

<sup>2</sup> *Jiangsu Province Key Laboratory of Fine Petrochemical Engineering, Changzhou University,  
Changzhou 213164, China*

<sup>3</sup> *Department of Chemistry, The Hong Kong University of Science and Technology, Clethyl  
acetater Water Bay, Kowloon, Hong Kong SAR (China)*

<sup>4</sup> *College of Chemistry and Molecular Sciences, Engineering Resethyl acetaterch Center of  
Organosilicon Compounds & Materials, Ministry of Education, Wuhan University, Wuhan,  
Hubei, 430072, China*

**Table of Contents**

|                                                     |           |
|-----------------------------------------------------|-----------|
| <b>I. General Information.....</b>                  | <b>S2</b> |
| <b>II. Preparation of Substrates .....</b>          | <b>S3</b> |
| <b>III. Asymmetric Synthesis of Chiral 3a .....</b> | <b>S5</b> |

HPLC and NMR Spectra

## I. General Information

Flash column chromatography was performed over silica gel (200-300 mesh) purchased from Qindao Puke Co. Lit., China. All air or moisture sensitive rethyl acetatections were conducted in oven-dried glassware under nitrogen atmosphere using anhydrous solvents. Anhydrous toluene, dichloromethane and tetrahydrofuran were purified by the Innovative® solvent purification system. Other anhydrous solvents were purchased from J&K Scientific.  $^1\text{H}$ ,  $^{13}\text{C}$ , and  $^{19}\text{F}$  NMR spectra were collected on a Bruker AV 400 or AV 300 MHz NMR spectrometer using residue solvent pethyl acetateks as an internal standard ( $^1\text{H}$  NMR:  $\text{CDCl}_3$  at 7.26 ppm;  $^{13}\text{C}$  NMR:  $\text{CDCl}_3$  at 77.15 ppm). HRMS spectra were collected on an Agilent GC/MS 5975C system, a MALDI Micro MX mass spectrometer, or an API QSTAR XL System with TOF as mass analyzer.

## II. Preparation of Substrates

### General Procedure A for the Preparation of Indoloxazinones 1.

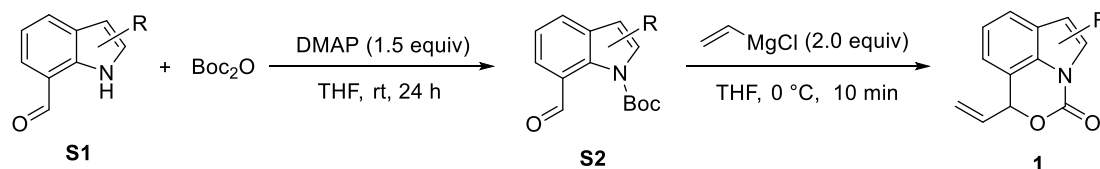

To a solution of indole-7-carboxaldehyde **S1** (0.73 g, 5.0 mmol, 1.0 equiv), *N,N*-dimethylpyridin-4-amine (DMAP) (0.92 g, 7.5 mmol, 1.5 equiv) in THF (15 mL) was added Boc<sub>2</sub>O (2.18 g, 10.0 mmol, 2.0 equiv). Then the reaction mixture was stirred under room temperature for 24 h. The reaction mixture was quenched by saturated Na<sub>2</sub>CO<sub>3</sub> solution (20 mL), extracted by ethyl acetate (20 mL × 3). Combined organic phase were washed by water, brine and dried over anhydrous Na<sub>2</sub>SO<sub>4</sub>, and concentrated under reduced pressure. The residue was purified by silica gel column chromatography (petroleum ether/ethyl acetate = 3:1) to afford the desired product **S2** in 90% Yield (1.10 g).

Under N<sub>2</sub> atmosphere at 0 °C, to a solution of **S2** (1.10 g, 4.5 mmol, 1.0 equiv) in anhydrous THF (13.5 mL) was added dropwise vinyl magnesium chloride (4.5 mL, 2.0 M in THF, 2.0 equiv). Then the reaction mixture was stirred at 0 °C for 10 min. The reaction mixture was quenched with saturated NH<sub>4</sub>Cl solution and extracted with ethyl acetate (20 mL × 3). The combined organic layers were dried with Na<sub>2</sub>SO<sub>4</sub> and evaporated under reduced pressure. The residue was purified by chromatography on silica gel (petroleum ether/ethyl acetate) to afford the desired indoloxazinones **1**.

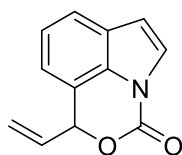

**1a**

**1-Vinyl-1*H*,3*H*-[1,3]oxazino[5,4,3-*hi*]indol-3-one (1a)** was prepared according to the General Procedure A as a pink solid (chromatography eluent: petroleum ether/ethyl acetate = 9:1) in 36% yield (322.4 mg).

<sup>1</sup>H NMR (400MHz, CDCl<sub>3</sub>) δ 7.62 (d, *J* = 3.6 Hz, 1H), 7.53 (d, *J* = 7.9 Hz, 1H), 7.27 (t, *J* = 7.5 Hz, 1H), 7.02 (d, *J* = 7.4 Hz, 1H), 6.70 (d, *J* = 3.6 Hz, 1H), 6.31 (d, *J* = 6.9 Hz, 1H), 6.17-6.09 (m, 1H), 5.52-5.43 (m, 2H) ppm.

<sup>13</sup>C NMR (100MHz, CDCl<sub>3</sub>) δ 145.9, 134.3, 132.0, 127.5, 124.2 (2 C), 120.9, 119.9, 118.7, 117.2, 109.7, 84.3 ppm.

HRMS (Cl<sup>-</sup>) Calcd for C<sub>12</sub>H<sub>9</sub>NNaO<sub>2</sub> [M + Na]<sup>+</sup>: 222.0531, Found: 222.0523.

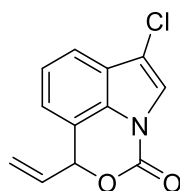

**1b**

**6-Chloro-1-vinyl-1*H*,3*H*-[1,3]oxazino[5,4,3-*hi*]indol-3-one (1b)** was prepared according to the General Procedure A as a yellow solid (chromatography eluent: petroleum ether/ethyl acetate = 9:1) in 30% yield (182.2mg).

<sup>1</sup>H NMR (400MHz, CDCl<sub>3</sub>) δ 7.58 (s, 1H), 7.53 (d, *J* = 7.9 Hz, 1H), 7.34 (t, *J* = 7.4 Hz, 1H), 7.08 (d, *J* = 7.3 Hz, 1H), 6.31 (d, *J* = 6.8 Hz, 1H), 6.16-6.07 (m, 1H), 5.51-5.45 (m, 2H) ppm.

<sup>13</sup>C NMR (100MHz, CDCl<sub>3</sub>) δ 144.8, 133.9, 131.3, 125.4, 124.8, 120.5, 120.3, 119.9, 118.8, 117.3, 115.2, 84.3 ppm.

HRMS (Cl<sup>-</sup>) Calcd for C<sub>12</sub>H<sub>8</sub>ClNNaO<sub>2</sub> [M + Na]<sup>+</sup>: 256.0142, Found: 256.0149.



### III. Asymmetric Synthesis of Chiral 3a

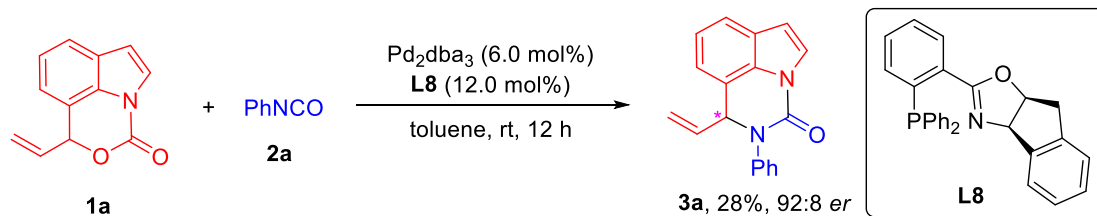

Under  $\text{N}_2$  at room temperature, to a solution of indoloxazinones **1a** (119.4 mg, 0.6 mmol, 2.0 equiv) and isocyanatobenzene **2a** (35.7 mg, 0.3 mmol, 1.0 equiv) in toluene (5.0 mL) was added  $\text{Pd}_2\text{dba}_3$  (16.5 mg, 0.018 mmol, 6.0 mol%) and **L8** (15.1 mg, 0.036 mmol, 12.0 mol%). Then the reaction mixture was stirred at room temperature for 12 h. The reaction mixture was directly concentrated and purified by silica gel column chromatography (petroleum ether/ethyl acetate) to afford the desired products **3a** (23.0 mg, 28%).

$[\alpha]_{\text{D}}^{25}$ : +12.3 ( $c = 0.12$ ,  $\text{CHCl}_3$ ). HPLC (AD,  $i$ -PrOH/ $n$ -hexane = 10/90, flow rate = 1.0 mL/min,  $l = 210$  nm)  $t_{\text{R}} = 14.17$  min (major), 15.92 min (minor).

# HPLC and NMR spectra

## Data Report

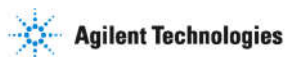

File of data: D:\ChemStation\2\Data\20191015\_2022-09-27\_08-43-04\XY-1-85RAC.D  
 Sample name: XY-1-85RAC  
 Remarks: XY-1-85RAC  
 Acq. instrument: LC1260  
 Injection date: 2022/9/27 8:56:28  
 Acq. Method: AD-10-30.M  
 Analysis Method: AD-10-30.M  
 Last changed: 2023/9/9 8:51:35  
 Location: P2-A21  
 Inj: of 1  
 Inj Volume: 5.000  
 Acq. Operator: system

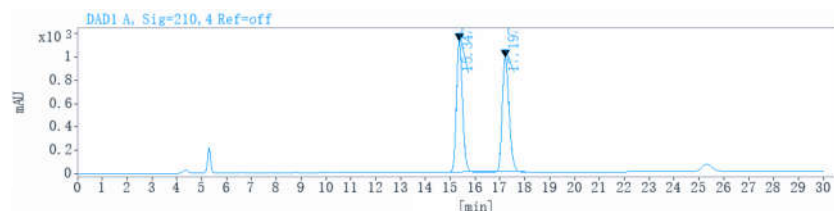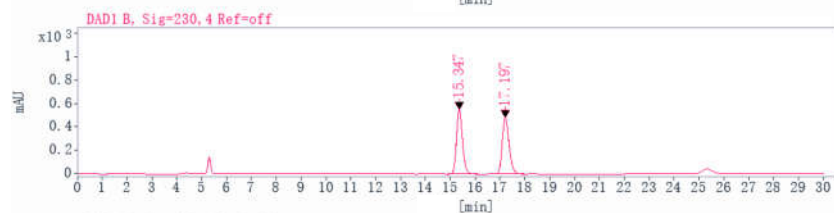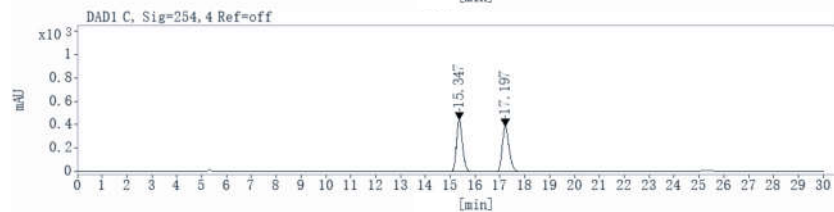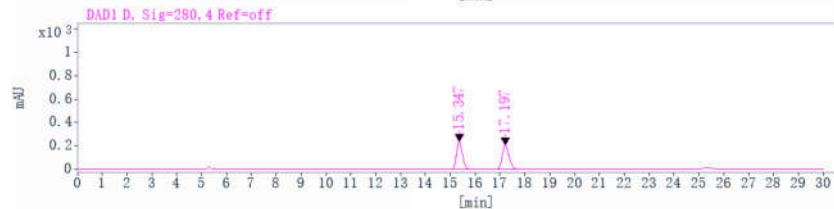

## Data Report

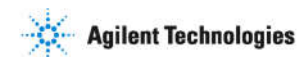

Signal: DAD1 A, Sig=210,4 Ref=off

| RetTime [min] | Type | Width [min] | Area [mAu*s] | Height [mAu\U] | Area% Name |
|---------------|------|-------------|--------------|----------------|------------|
| 15.347        | BB   | 0.2616      | 18982.5898   | 1120.8324      | 49.9706    |
| 17.197        | BB   | 0.2980      | 19004.8945   | 981.1110       | 50.0294    |
|               |      |             | total        | 37987.4844     |            |

Signal: DAD1 B, Sig=230,4 Ref=off

| RetTime [min] | Type | Width [min] | Area [mAu*s] | Height [mAu\U] | Area% Name |
|---------------|------|-------------|--------------|----------------|------------|
| 15.347        | BB   | 0.2603      | 9273.3574    | 551.0185       | 50.1093    |
| 17.197        | BB   | 0.2962      | 9232.9092    | 480.5157       | 49.8907    |
|               |      |             | total        | 18506.2666     |            |

Signal: DAD1 C, Sig=254,4 Ref=off

| RetTime [min] | Type | Width [min] | Area [mAu*s] | Height [mAu\U] | Area% Name |
|---------------|------|-------------|--------------|----------------|------------|
| 15.347        | BB   | 0.2602      | 7490.4551    | 445.5006       | 50.0748    |
| 17.197        | BB   | 0.2963      | 7468.0879    | 388.4718       | 49.9252    |
|               |      |             | total        | 14958.5430     |            |

Signal: DAD1 D, Sig=280,4 Ref=off

| RetTime [min] | Type | Width [min] | Area [mAu*s] | Height [mAu\U] | Area% Name |
|---------------|------|-------------|--------------|----------------|------------|
| 15.347        | BB   | 0.2603      | 4006.8411    | 238.1681       | 50.1019    |
| 17.197        | BB   | 0.2962      | 3990.5498    | 207.6276       | 49.8981    |
|               |      |             | total        | 7997.3909      |            |

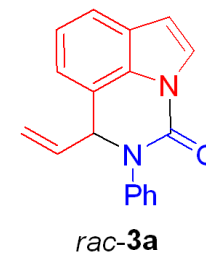

## Data Report

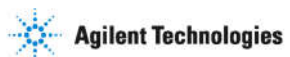

File of data: D:\ChemStation\2\Data\20191015\_2022-09-29\_15-28-11\XY-1-89-1.D  
 Sample name: XY-1-89-1  
 Remarks: XY-1-89-1  
 Acq. instrument: LC1260  
 Injection date: 2022/9/29 18:42:48  
 Acq. Method: AD-10-30.M  
 Analysis Method: AD-10-30.M  
 Last changed: 2023/9/9 8:53:07

Location: P2-M11  
 Inj: of 1  
 Inj Volume: 5.000  
 Acq. Operator: system

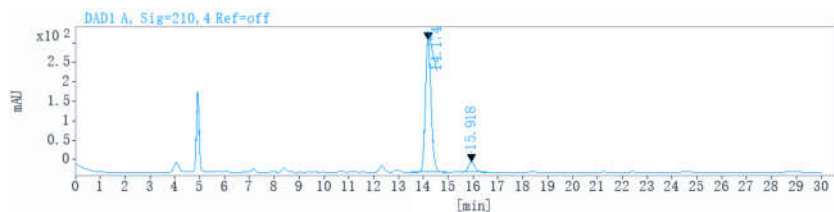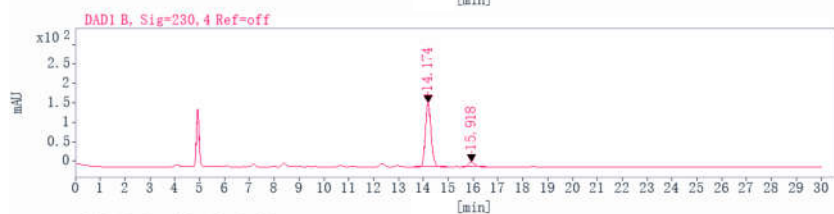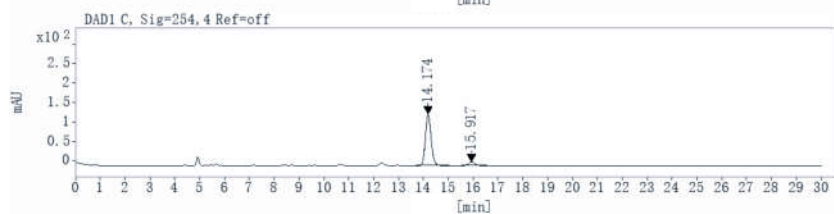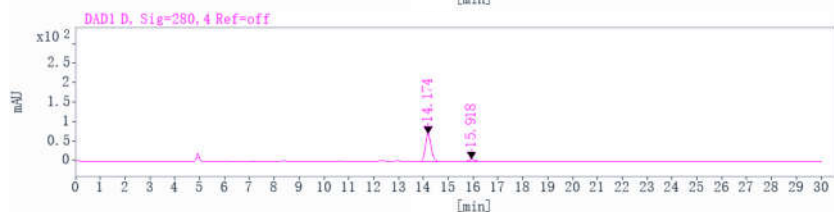

## Data Report



Signal: DAD1 A, Sig=210, 4 Ref=off

| RetTime [min] | Type | Width [min] | Area [mAu*s] | Height [mAu/U] | Area% Name |
|---------------|------|-------------|--------------|----------------|------------|
| 14.174        | BB   | 0.2479      | 5482.9136    | 340.5095       | 91.9910    |
| 15.918        | BB   | 0.2772      | 477.3609     | 26.6232        | 8.0090     |
| total         |      |             | 5960.274     |                |            |

Signal: DAD1 B, Sig=230, 4 Ref=off

| RetTime [min] | Type | Width [min] | Area [mAu*s] | Height [mAu/U] | Area% Name |
|---------------|------|-------------|--------------|----------------|------------|
| 14.174        | BB   | 0.2475      | 2653.8379    | 165.1014       | 92.0396    |
| 15.918        | BB   | 0.2771      | 229.5280     | 12.8086        | 7.9604     |
| total         |      |             | 2883.365     |                |            |

Signal: DAD1 C, Sig=254, 4 Ref=off

| RetTime [min] | Type | Width [min] | Area [mAu*s] | Height [mAu/U] | Area% Name |
|---------------|------|-------------|--------------|----------------|------------|
| 14.174        | BB   | 0.2474      | 2136.3589    | 133.0123       | 91.9861    |
| 15.917        | BB   | 0.2786      | 186.1212     | 10.3111        | 8.0139     |
| total         |      |             | 2322.480     |                |            |

Signal: DAD1 D, Sig=280, 4 Ref=off

| RetTime [min] | Type | Width [min] | Area [mAu*s] | Height [mAu/U] | Area% Name |
|---------------|------|-------------|--------------|----------------|------------|
| 14.174        | BB   | 0.2477      | 1148.1897    | 71.3848        | 92.0091    |
| 15.918        | BB   | 0.2777      | 99.7190      | 5.5487         | 7.9909     |
| total         |      |             | 1247.908     |                |            |

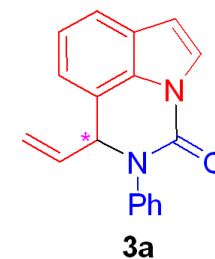

XY-3-99-H

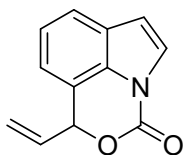

1a

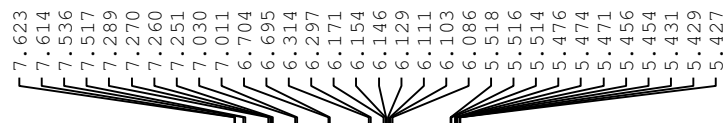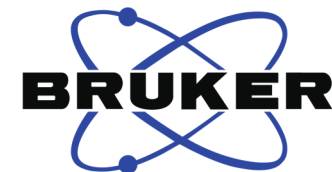

Current Data Parameters  
NAME 2023-7-4  
EXPNO 2  
PROCNO 1

F2 - Acquisition Parameters  
Date\_ 20230705  
Time 11.05 h  
INSTRUM Avance  
PROBHD z116098\_0833 (  
PULPROG zg30  
TD 65536  
SOLVENT CDCl3  
NS 16  
DS 2  
SWH 8196.722 Hz  
FIDRES 0.250144 Hz  
AQ 3.9976959 sec  
RG 101  
DW 61.000 usec  
DE 13.54 usec  
TE 294.5 K  
D1 1.00000000 sec  
TD0 1  
SFO1 400.1324708 MHz  
NUC1 1H  
P0 3.33 usec  
P1 10.00 usec  
PLW1 20.73200035 W

F2 - Processing parameters  
SI 65536  
SF 400.1300097 MHz  
WDW EM  
SSB 0  
LB 0.30 Hz  
GB 0  
PC 1.00

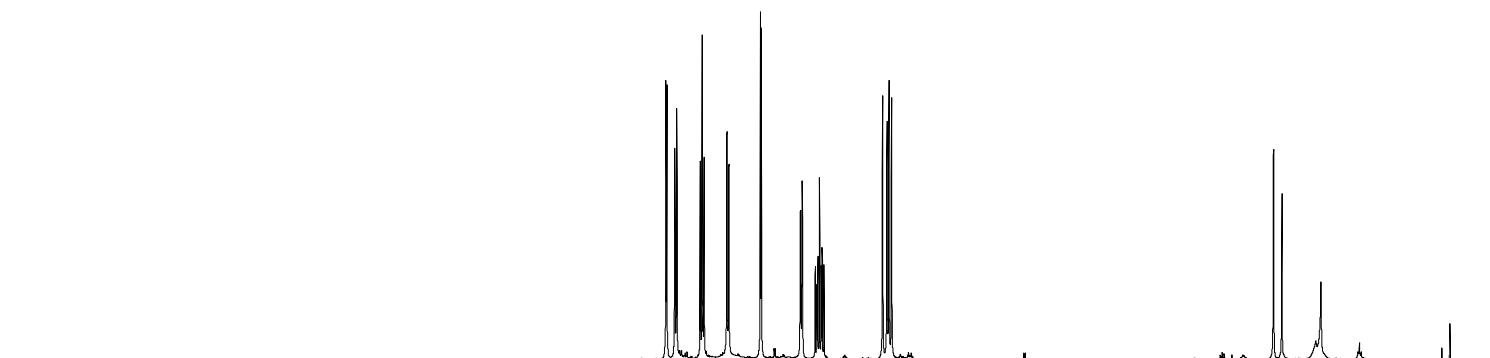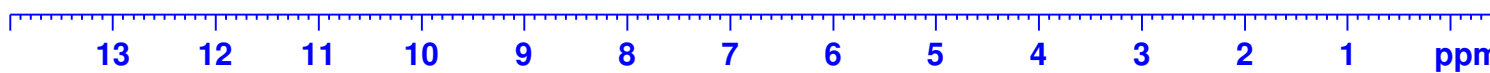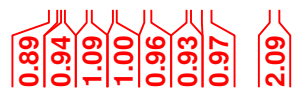

XY-3-99-C

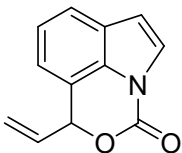

1a

145.93  
134.27  
132.01  
127.52  
124.24  
124.20  
120.85  
119.89  
118.70  
117.23  
109.74  
84.25  
77.46  
77.15  
76.83

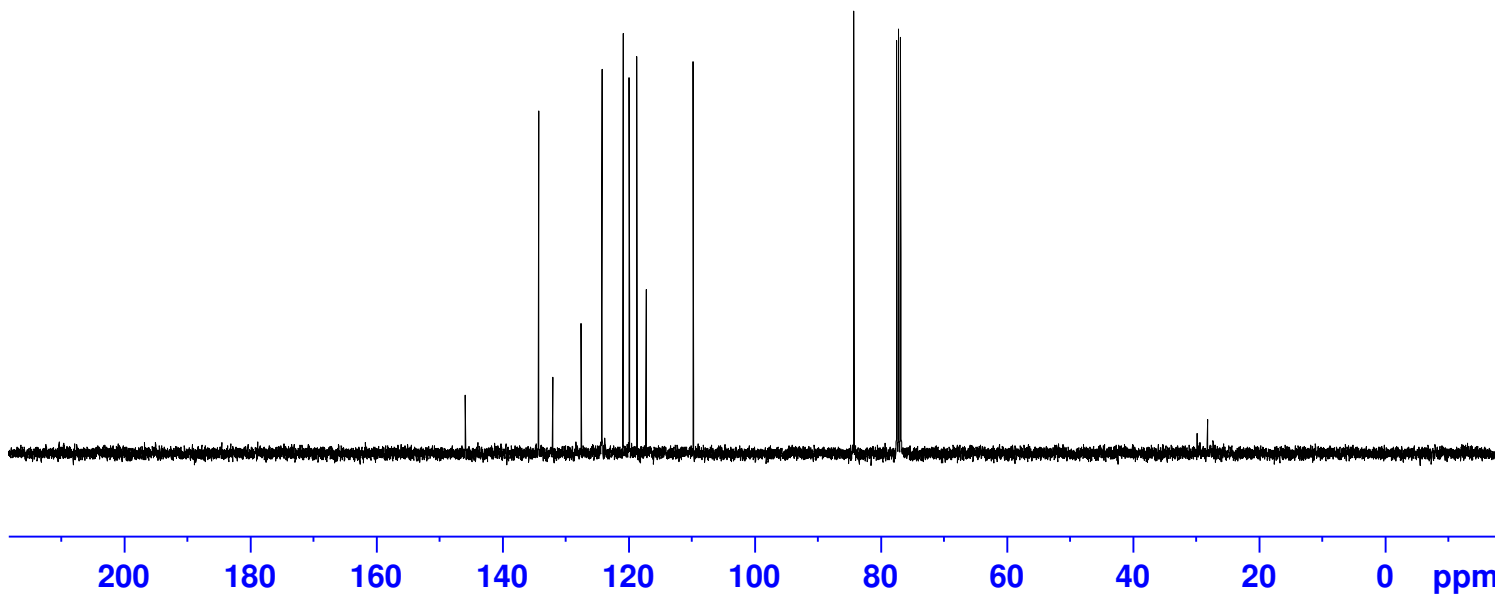

Current Data Parameters  
NAME 2023-7-4  
EXPNO 3  
PROCNO 1

F2 - Acquisition Parameters  
Date\_ 20230705  
Time 11.17 h  
INSTRUM Avance  
PROBHD z116098\_0833 (  
PULPROG zgpg30  
TD 65536  
SOLVENT CDC13  
NS 200  
DS 4  
SWH 23809.523 Hz  
FIDRES 0.726609 Hz  
AQ 1.3762560 sec  
RG 43.5965  
DW 21.000 usec  
DE 6.50 usec  
TE 295.0 K  
D1 2.00000000 sec  
D11 0.03000000 sec  
TD0 1  
SFO1 100.6228298 MHz  
NUC1 13C  
P0 3.33 usec  
P1 10.00 usec  
PLW1 87.89900208 W  
SFO2 400.1316005 MHz  
NUC2 1H  
CPDPRG[2] waltz65  
PCPD2 90.00 usec  
PLW2 20.73200035 W  
PLW12 0.25595000 W  
PLW13 0.12874000 W

F2 - Processing parameters  
SI 32768  
SF 100.6127605 MHz  
WDW EM  
SSB 0  
LB 1.00 Hz  
GB 0  
PC 1.40

XY-3-40-N-H

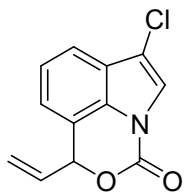

**1b**

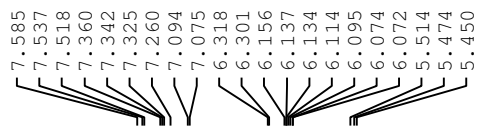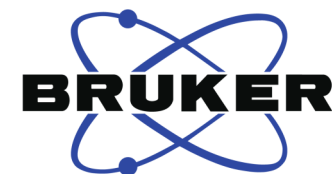

Current Data Parameters  
NAME 2023-4-24  
EXPNO 1  
PROCNO 1

F2 - Acquisition Parameters  
Date\_ 20230424  
Time 23.28 h  
INSTRUM Avance  
PROBHD z116098\_0833 (  
PULPROG zg30  
TD 65536  
SOLVENT CDC13  
NS 16  
DS 2  
SWH 8196.722 Hz  
FIDRES 0.250144 Hz  
AQ 3.9976959 sec  
RG 93.006  
DW 61.000 usec  
DE 13.54 usec  
TE 294.3 K  
D1 1.00000000 sec  
TD0 1  
SFO1 400.1324708 MHz  
NUC1 1H  
P0 3.33 usec  
P1 10.00 usec  
PLW1 20.73200035 W

F2 - Processing parameters  
SI 65536  
SF 400.1300110 MHz  
WDW EM  
SSB 0  
LB 0.30 Hz  
GB 0  
PC 1.00

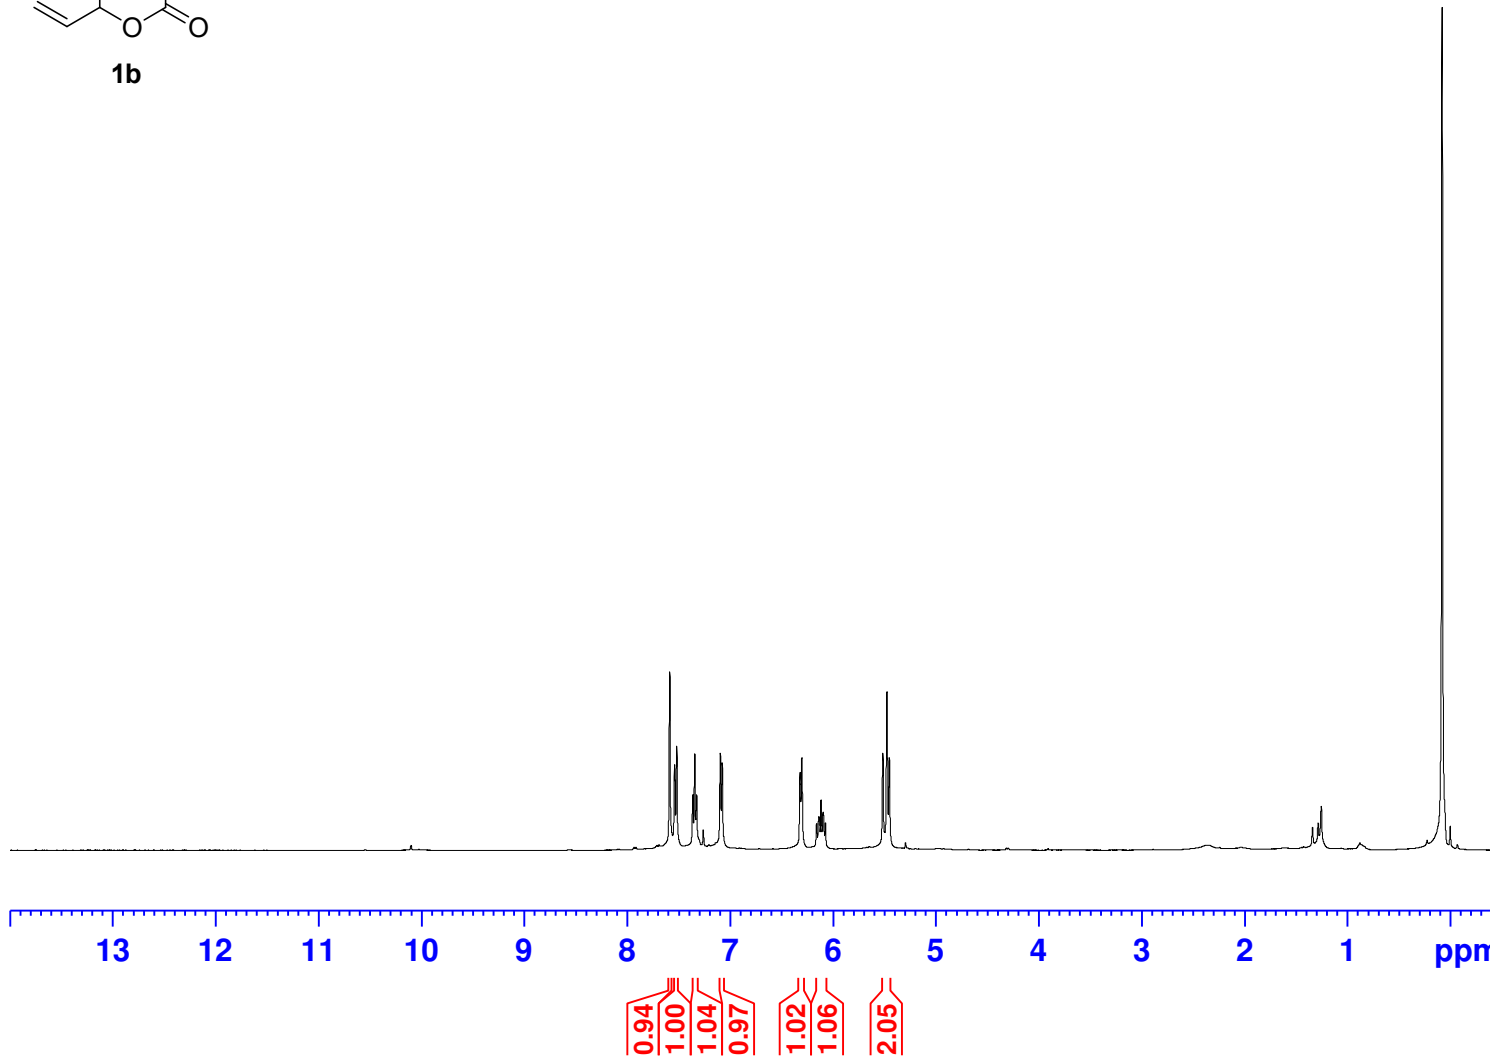

XY-3-40-N-C

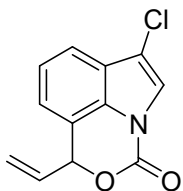

1b

144.81  
133.88  
131.26  
125.36  
124.78  
120.49  
120.34  
119.94  
118.80  
117.34  
115.20  
84.28  
77.46  
77.15  
76.83

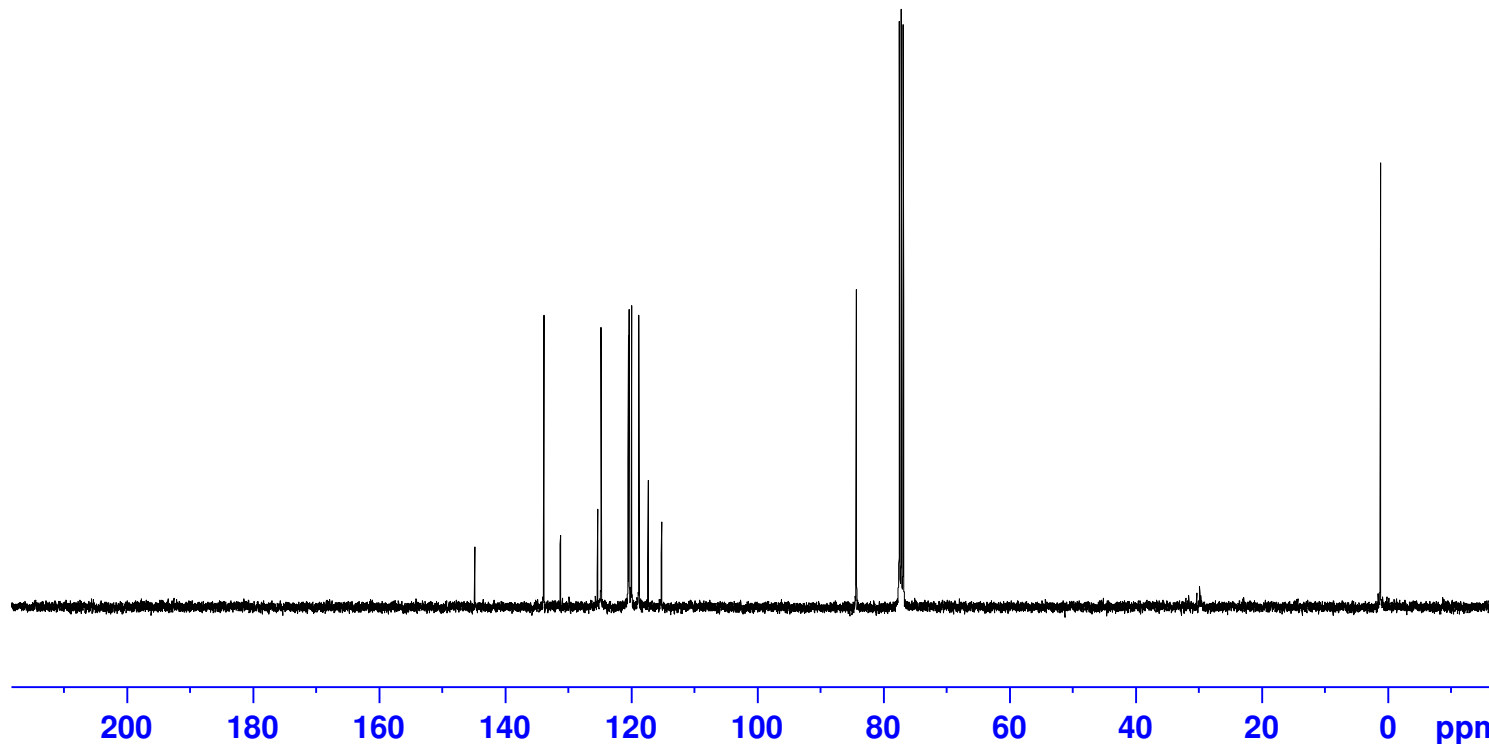

Current Data Parameters  
NAME 2023-4-24  
EXPNO 2  
PROCNO 1

F2 - Acquisition Parameters  
Date\_ 20230424  
Time 23.58 h  
INSTRUM Avance  
PROBHD z116098\_0833 (  
PULPROG zgpg30  
TD 65536  
SOLVENT CDC13  
NS 500  
DS 4  
SWH 23809.523 Hz  
FIDRES 0.726609 Hz  
AQ 1.3762560 sec  
RG 46.0295  
DW 21.000 usec  
DE 6.50 usec  
TE 294.9 K  
D1 2.00000000 sec  
D11 0.03000000 sec  
TD0 1  
SFO1 100.6228298 MHz  
NUC1 13C  
P0 3.33 usec  
P1 10.00 usec  
PLW1 87.89900208 W  
SFO2 400.1316005 MHz  
NUC2 1H  
CPDPRG[2] waltz65  
PCPD2 90.00 usec  
PLW2 20.73200035 W  
PLW12 0.25595000 W  
PLW13 0.12874000 W

F2 - Processing parameters  
SI 32768  
SF 100.6127606 MHz  
WDW EM  
SSB 0  
LB 1.00 Hz  
GB 0  
PC 1.40

XY-4-26

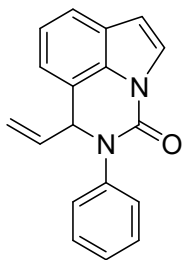

3a

7.746  
7.738  
7.533  
7.513  
7.475  
7.473  
7.469  
7.463  
7.456  
7.452  
7.441  
7.435  
7.374  
7.368  
7.355  
7.353  
7.346  
7.337  
7.333  
7.330  
7.260  
7.241  
7.222  
7.019  
7.000  
6.656  
6.647  
6.002  
5.981  
5.977  
5.960  
5.956  
5.939  
5.935  
5.914  
5.665  
5.644  
5.090  
5.082  
5.081  
5.065  
5.038

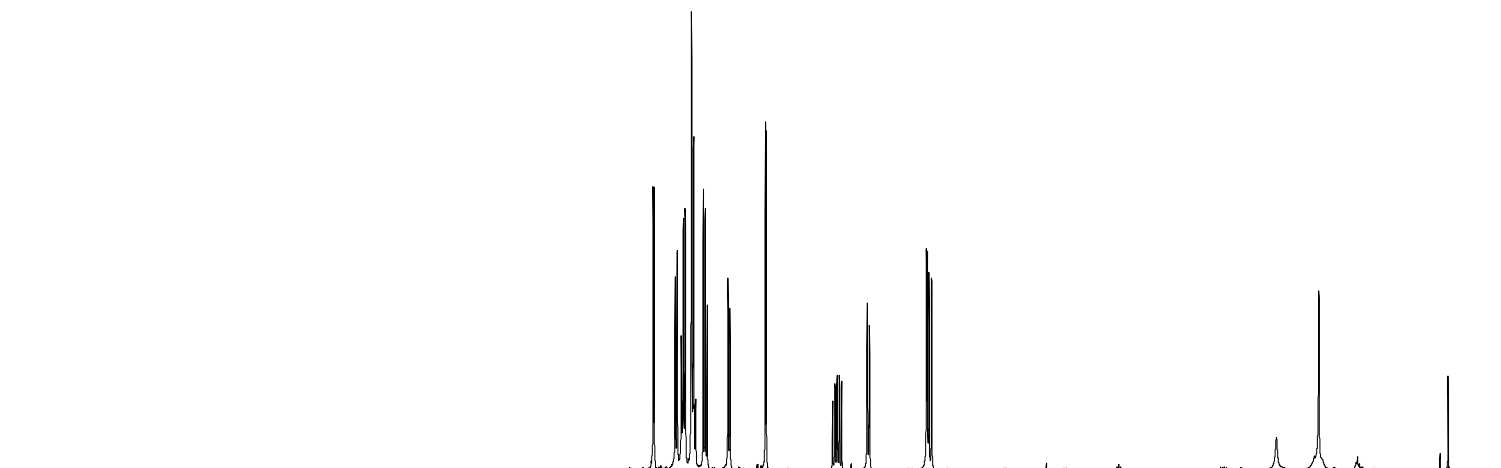

13 12 11 10 9 8 7 6 5 4 3 2 1 ppm

1.00  
1.03  
2.10  
3.12  
1.14  
1.02  
1.03  
1.07  
1.08  
2.02



Current Data Parameters  
NAME 2023-7-25  
EXPNO 1  
PROCNO 1

F2 - Acquisition Parameters  
Date\_ 20230726  
Time 4.26 h  
INSTRUM Avance  
PROBHD z116098\_0833 (  
PULPROG zg30  
TD 65536  
SOLVENT CDCl3  
NS 16  
DS 2  
SWH 8196.722 Hz  
FIDRES 0.250144 Hz  
AQ 3.9976959 sec  
RG 100.806  
DW 61.000 usec  
DE 13.54 usec  
TE 294.4 K  
D1 1.00000000 sec  
TD0 1  
SFO1 400.1324708 MHz  
NUC1 1H  
P0 3.33 usec  
P1 10.00 usec  
PLW1 20.73200035 W

F2 - Processing parameters  
SI 65536  
SF 400.1300098 MHz  
WDW EM  
SSB 0  
LB 0.30 Hz  
GB 0  
PC 1.00



XY-4-26

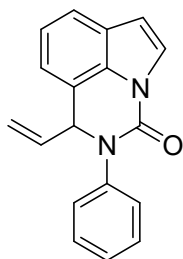

3a

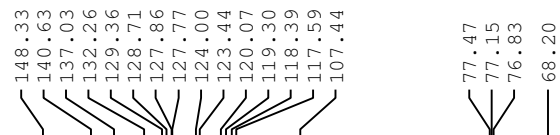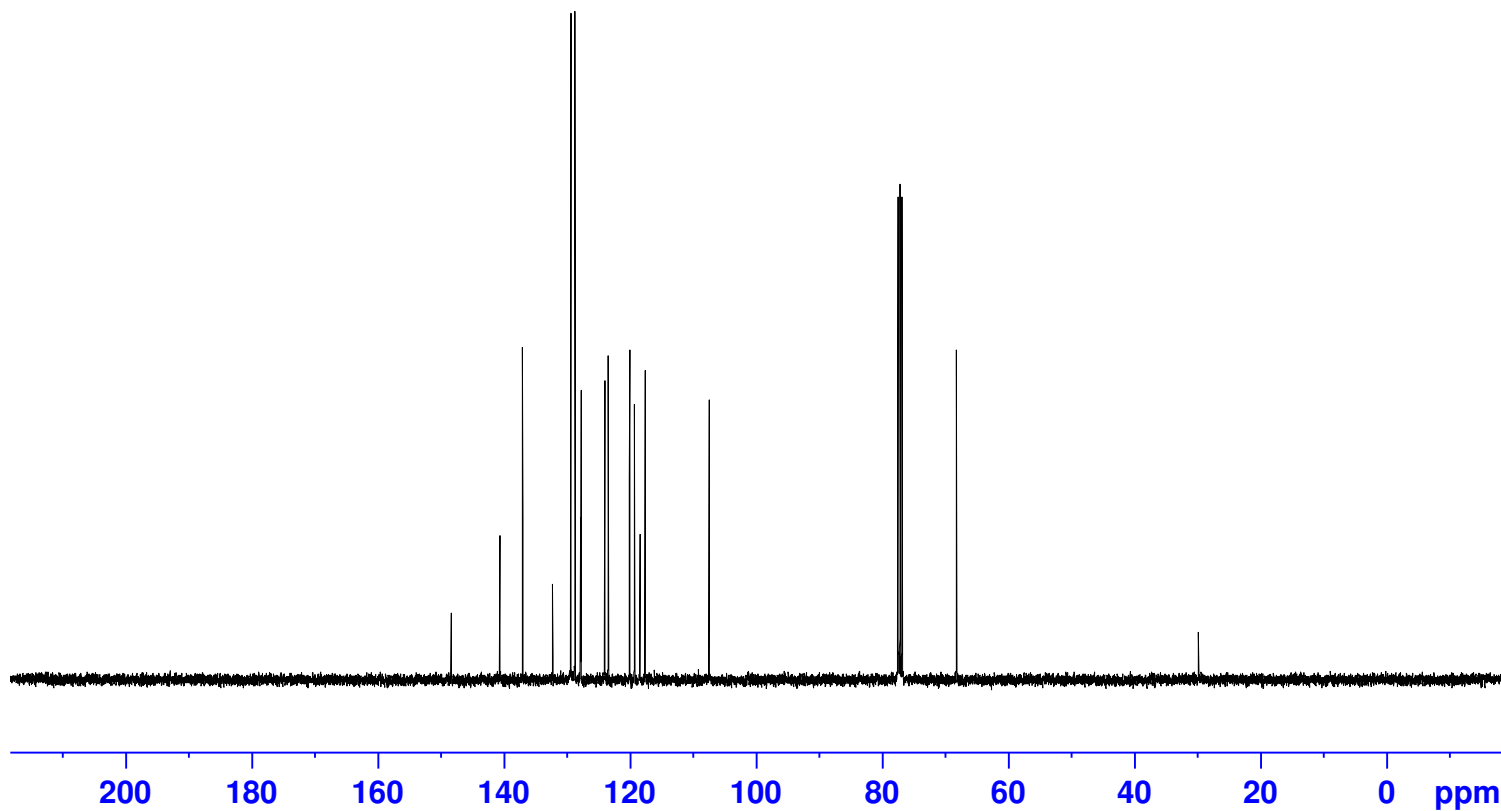

Current Data Parameters  
NAME 2023-7-25  
EXPNO 2  
PROCNO 1

F2 - Acquisition Parameters  
Date\_ 20230726  
Time 12.46 h  
INSTRUM Avance  
PROBHD z116098\_0833 (  
PULPROG zgpg30  
TD 65536  
SOLVENT CDC13  
NS 200  
DS 4  
SWH 23809.523 Hz  
FIDRES 0.726609 Hz  
AQ 1.3762560 sec  
RG 44.8788  
DW 21.000 usec  
DE 6.50 usec  
TE 294.6 K  
D1 2.00000000 sec  
D11 0.03000000 sec  
TD0 1  
SFO1 100.6228298 MHz  
NUC1 13C  
P0 3.33 usec  
P1 10.00 usec  
PLW1 87.89900208 W  
SFO2 400.1316005 MHz  
NUC2 1H  
CPDPRG[2] waltz65  
PCPD2 90.00 usec  
PLW2 20.73200035 W  
PLW12 0.25595000 W  
PLW13 0.12874000 W

F2 - Processing parameters  
SI 32768  
SF 100.6127628 MHz  
WDW EM  
SSB 0  
LB 1.00 Hz  
GB 0  
PC 1.40

XY-2-Z1-A

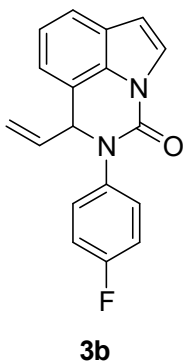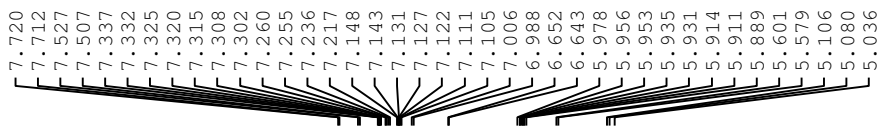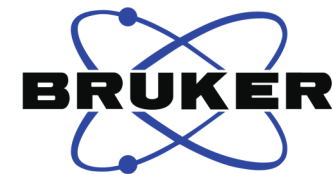

Current Data Parameters  
NAME xy-2-81-A  
EXPNO 5  
PROCNO 1

F2 - Acquisition Parameters  
Date\_ 20230303  
Time 23.27 h  
INSTRUM Avance  
PROBHD z116098\_0833 (  
PULPROG zg30  
TD 65536  
SOLVENT CDC13  
NS 16  
DS 2  
SWH 8196.722 Hz  
FIDRES 0.250144 Hz  
AQ 3.9976959 sec  
RG 101  
DW 61.000 usec  
DE 13.54 usec  
TE 295.2 K  
D1 1.00000000 sec  
TD0 1  
SFO1 400.1324708 MHz  
NUC1 1H  
P0 3.33 usec  
P1 10.00 usec  
PLW1 20.73200035 W

F2 - Processing parameters  
SI 65536  
SF 400.1300097 MHz  
WDW EM  
SSB 0  
LB 0.30 Hz  
GB 0  
PC 1.00

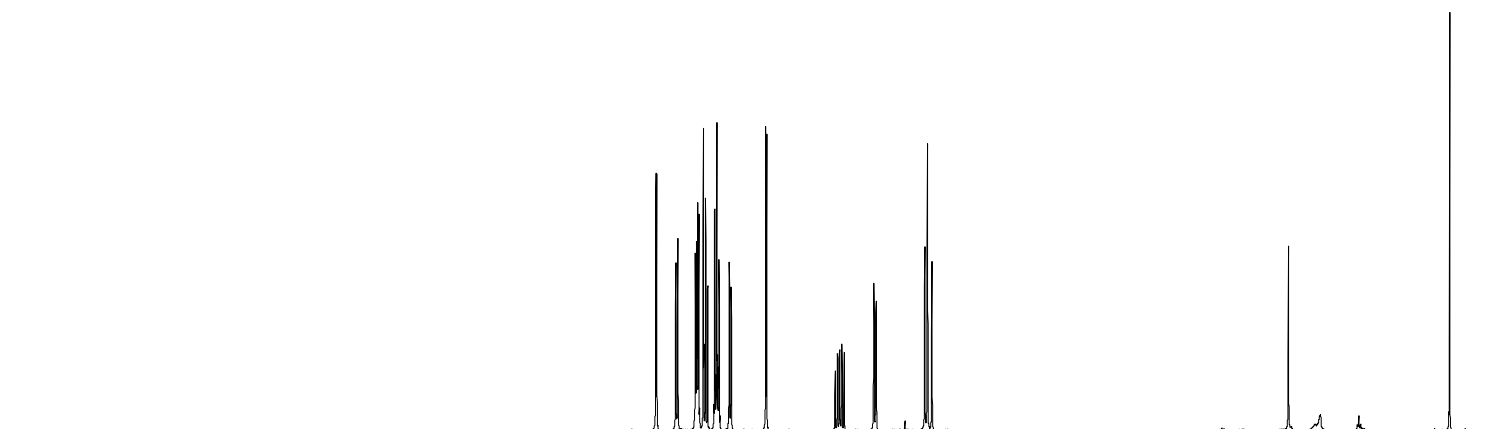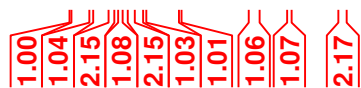

XY-2-81-A-C

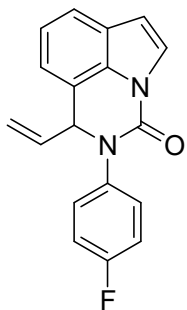

3b

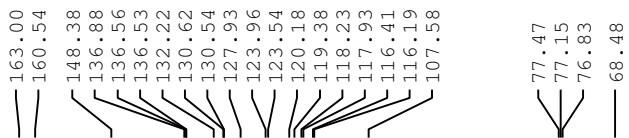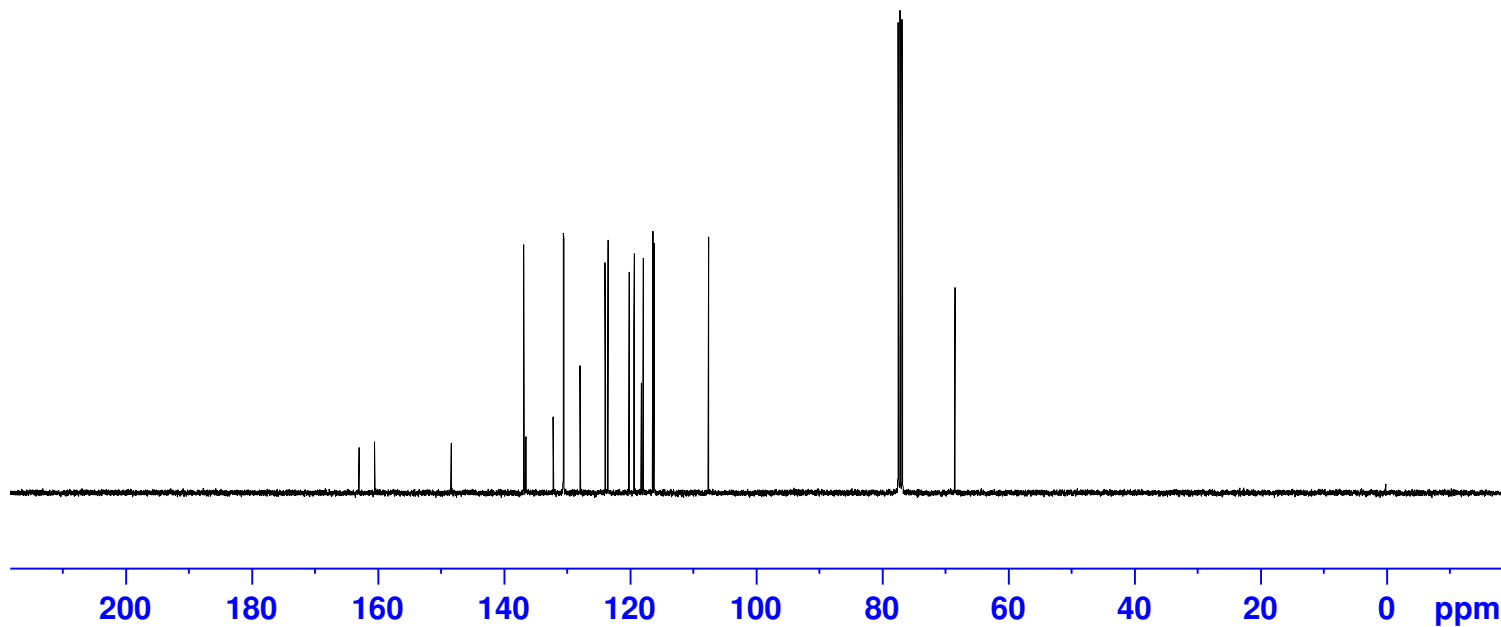

Current Data Parameters  
NAME Scope  
EXPNO 5  
PROCNO 1

F2 - Acquisition Parameters  
Date\_ 20230309  
Time 0.14 h  
INSTRUM Avance  
PROBHD z116098\_0833 (  
PULPROG zgpg30  
TD 65536  
SOLVENT CDC13  
NS 500  
DS 4  
SWH 23809.523 Hz  
FIDRES 0.726609 Hz  
AQ 1.3762560 sec  
RG 49.9878  
DW 21.000 usec  
DE 6.50 usec  
TE 298.2 K  
D1 2.00000000 sec  
D11 0.03000000 sec  
TD0 1  
SFO1 100.6228298 MHz  
NUC1 13C  
P0 3.33 usec  
P1 10.00 usec  
PLW1 87.89900208 W  
SFO2 400.1316005 MHz  
NUC2 1H  
CPDPRG[2] waltz65  
PCPD2 90.00 usec  
PLW2 20.73200035 W  
PLW12 0.25595000 W  
PLW13 0.12874000 W

F2 - Processing parameters  
SI 32768  
SF 100.6127600 MHz  
WDW EM  
SSB 0  
LB 1.00 Hz  
GB 0  
PC 1.40

XY-2-81-A-F

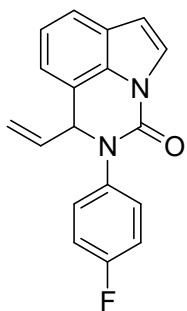

**3b**

— -113.83

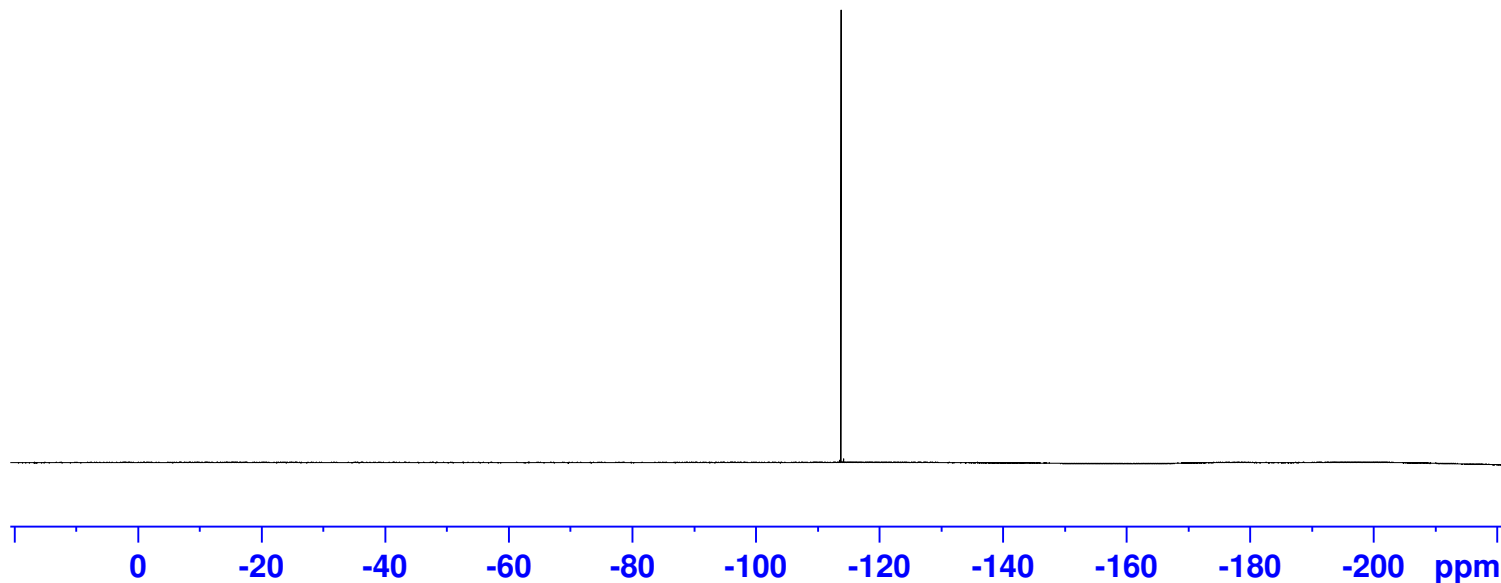

Current Data Parameters  
NAME LX-1-9-c.xy-81-a-F  
EXPNO 2  
PROCNO 1

F2 - Acquisition Parameters  
Date\_ 20230304  
Time 17.31 h  
INSTRUM Avance  
PROBHD z116098\_0833 (  
PULPROG zgig  
TD 131072  
SOLVENT CDCl3  
NS 16  
DS 4  
SWH 90909.094 Hz  
FIDRES 1.387163 Hz  
AQ 0.7208960 sec  
RG 101  
DW 5.500 usec  
DE 6.50 usec  
TE 295.2 K  
D1 1.00000000 sec  
D11 0.03000000 sec  
TD0 1  
SFO1 376.4607164 MHz  
NUC1 19F  
P1 18.00 usec  
PLW1 16.73100090 W  
SFO2 400.1316005 MHz  
NUC2 1H  
CPDPRG[2] waltz16  
PCPD2 90.00 usec  
PLW2 20.73200035 W  
PLW12 0.25595000 W

F2 - Processing parameters  
SI 65536  
SF 376.4983662 MHz  
WDW EM  
SSB 0  
LB 0.30 Hz  
GB 0  
PC 1.00

XY-2-81-B-H

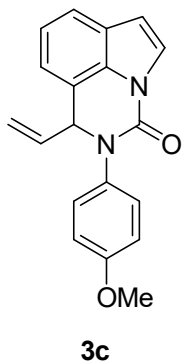

7.720  
7.711  
7.508  
7.489  
7.260  
7.254  
7.249  
7.243  
7.237  
7.229  
7.217  
7.198  
6.991  
6.972  
6.965  
6.957  
6.951  
6.940  
6.934  
6.628  
6.620  
5.984  
5.963  
5.959  
5.942  
5.938  
5.921  
5.917  
5.896  
5.583  
5.562  
5.085  
5.070  
5.068  
5.066  
5.060  
5.028  
5.026  
5.024  
3.827

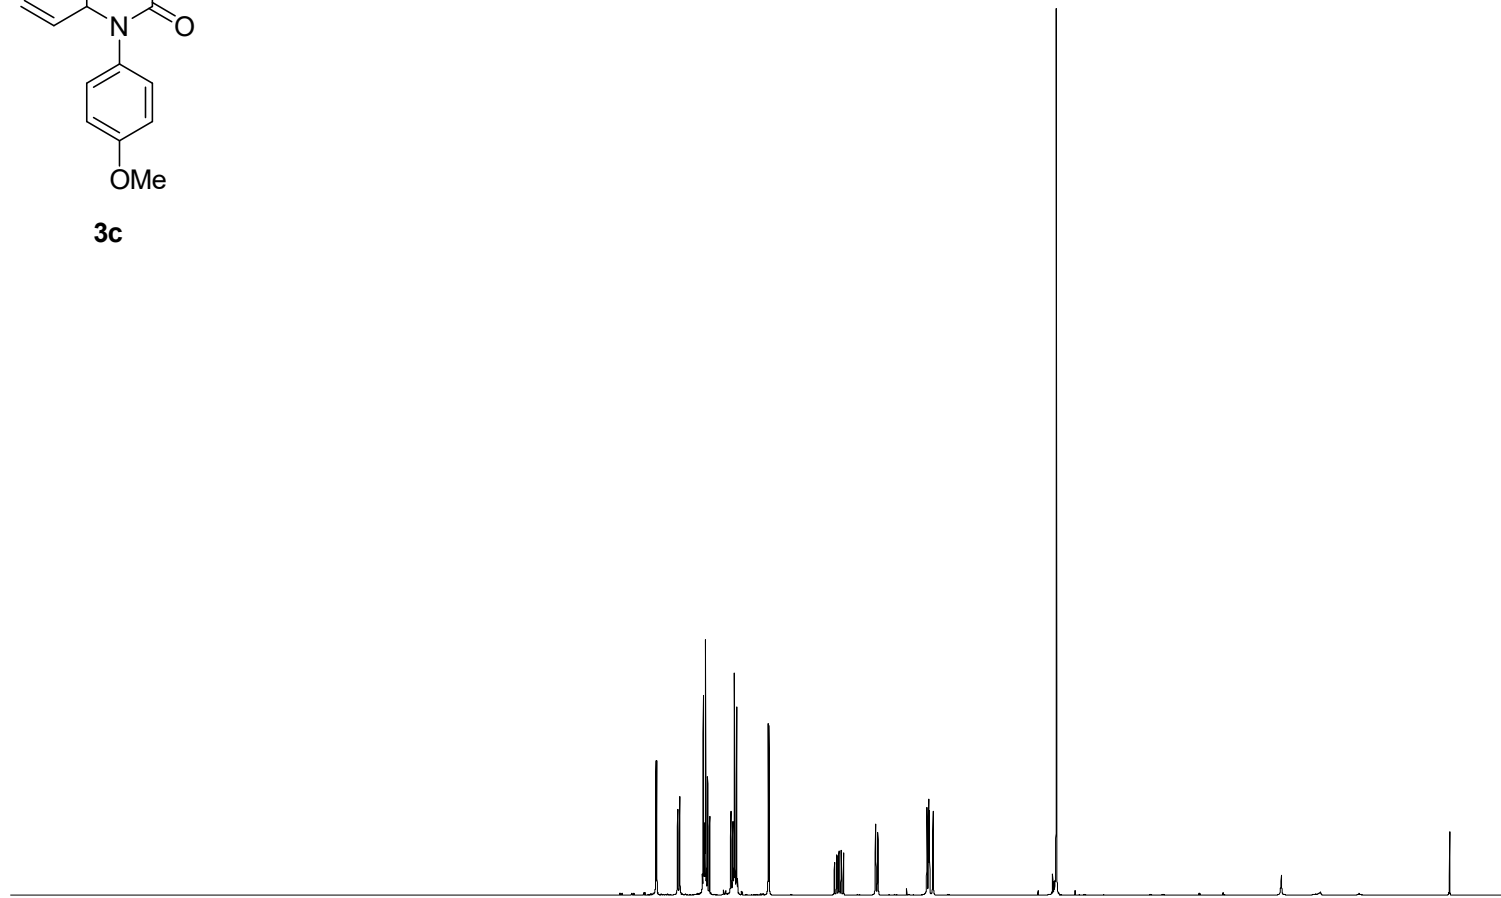

0.94  
0.98  
3.16  
3.00  
0.93  
0.97  
0.98  
1.99  
3.00



Current Data Parameters  
NAME Scope  
EXPNO 3  
PROCNO 1

F2 - Acquisition Parameters  
Date\_ 20230308  
Time 23.12 h  
INSTRUM Avance  
PROBHD z116098\_0833 (  
PULPROG zg30  
TD 65536  
SOLVENT CDC13  
NS 16  
DS 2  
SWH 8196.722 Hz  
FIDRES 0.250144 Hz  
AQ 3.9976959 sec  
RG 101  
DW 61.000 usec  
DE 13.54 usec  
TE 297.6 K  
D1 1.00000000 sec  
TD0 1  
SFO1 400.1324708 MHz  
NUC1 1H  
P0 3.33 usec  
P1 10.00 usec  
PLW1 20.73200035 W

F2 - Processing parameters  
SI 65536  
SF 400.1300139 MHz  
WDW EM  
SSB 0  
LB 0.30 Hz  
GB 0  
PC 1.00

XY-2-81-B-C

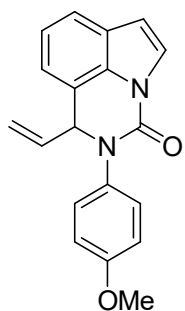

3c

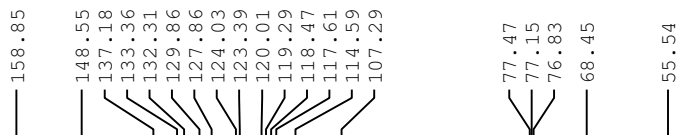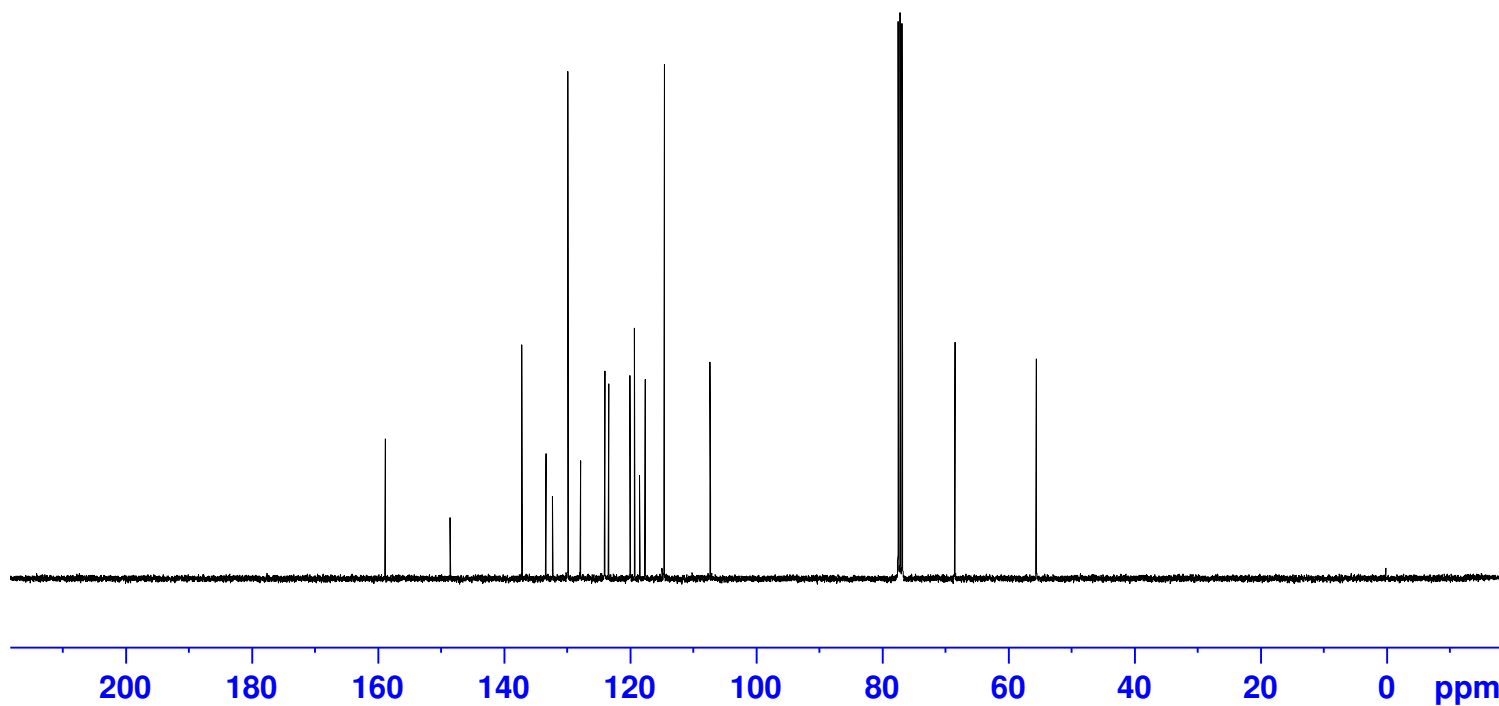

Current Data Parameters  
NAME Scope  
EXPNO 4  
PROCNO 1

F2 - Acquisition Parameters  
Date\_ 20230308  
Time 23.41 h  
INSTRUM Avance  
PROBHD z116098\_0833 (  
PULPROG zgpg30  
TD 65536  
SOLVENT CDCl3  
NS 500  
DS 4  
SWH 23809.523 Hz  
FIDRES 0.726609 Hz  
AQ 1.3762560 sec  
RG 48.6724  
DW 21.000 usec  
DE 6.50 usec  
TE 298.1 K  
D1 2.00000000 sec  
D11 0.03000000 sec  
TD0 1  
SFO1 100.6228298 MHz  
NUC1 13C  
P0 3.33 usec  
P1 10.00 usec  
PLW1 87.89900208 W  
SFO2 400.1316005 MHz  
NUC2 1H  
CPDPRG[2] waltz65  
PCPD2 90.00 usec  
PLW2 20.73200035 W  
PLW12 0.25595000 W  
PLW13 0.12874000 W

F2 - Processing parameters  
SI 32768  
SF 100.6127605 MHz  
WDW EM  
SSB 0  
LB 1.00 Hz  
GB 0  
PC 1.40

XY-3-9-A-H

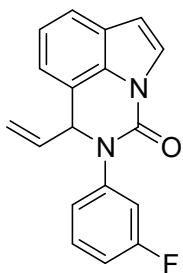

3d

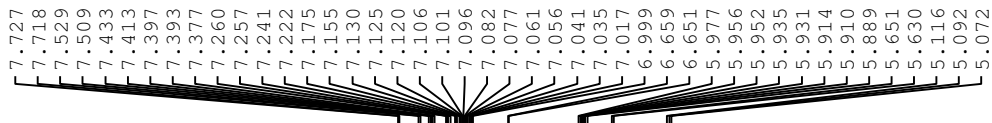

Current Data Parameters  
NAME Scopel  
EXPNO 4  
PROCNO 1

F2 - Acquisition Parameters  
Date\_ 20230311  
Time 1.13 h  
INSTRUM Avance  
PROBHD z116098\_0833 (  
PULPROG zg30  
TD 65536  
SOLVENT CDC13  
NS 16  
DS 2  
SWH 8196.722 Hz  
FIDRES 0.250144 Hz  
AQ 3.9976959 sec  
RG 101  
DW 61.000 usec  
DE 13.54 usec  
TE 292.7 K  
D1 1.00000000 sec  
TD0 1  
SFO1 400.1324708 MHz  
NUC1 1H  
P0 3.33 usec  
P1 10.00 usec  
PLW1 20.73200035 W

F2 - Processing parameters  
SI 65536  
SF 400.1300112 MHz  
WDW EM  
SSB 0  
LB 0.30 Hz  
GB 0  
PC 1.00

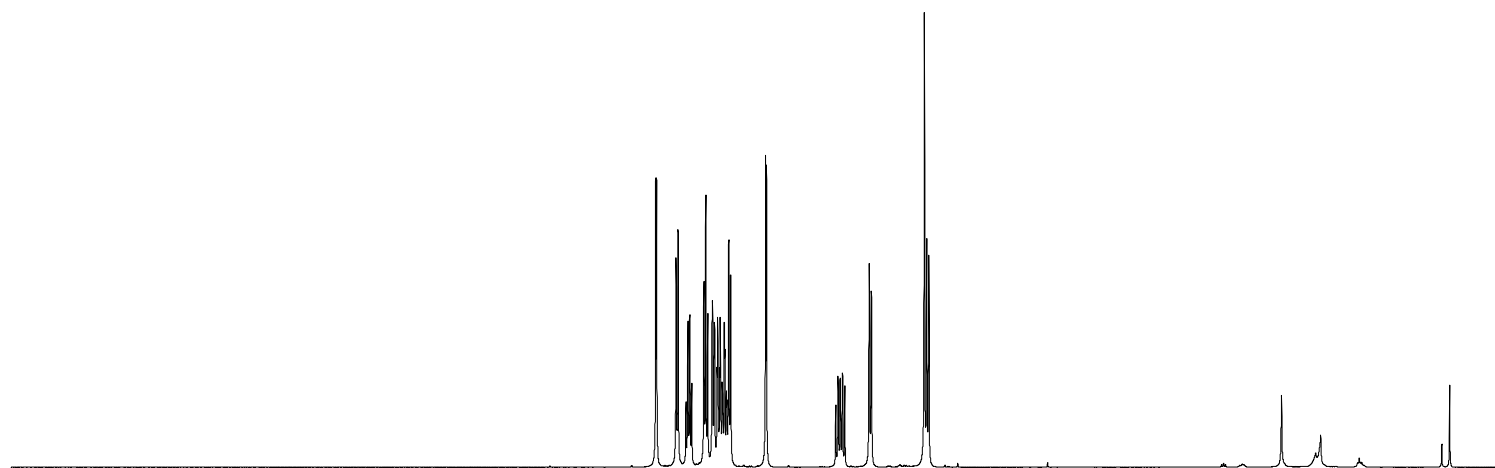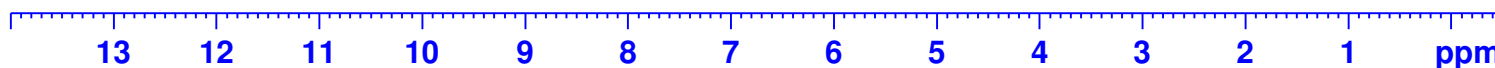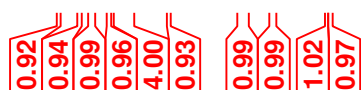

XY-3-9-A-C

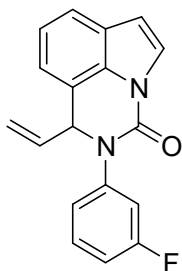

3d

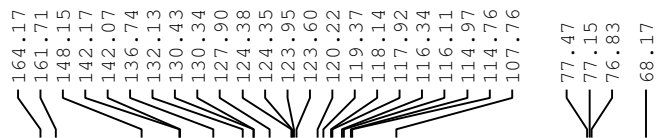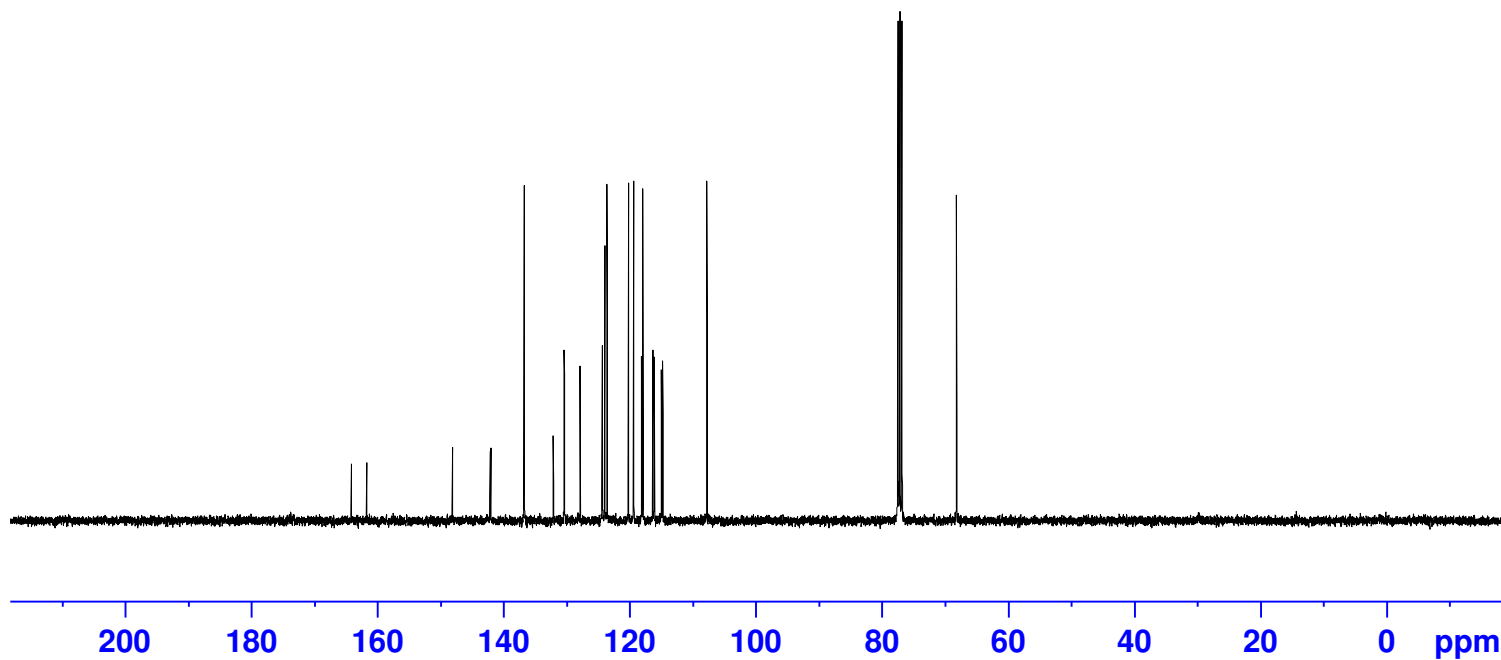

Current Data Parameters  
NAME 2023-3-16  
EXPNO 2  
PROCNO 1

F2 - Acquisition Parameters  
Date\_ 20230315  
Time 0.41 h  
INSTRUM Avance  
PROBHD z116098\_0833 (  
PULPROG zgpg30  
TD 65536  
SOLVENT CDC13  
NS 500  
DS 4  
SWH 23809.523 Hz  
FIDRES 0.726609 Hz  
AQ 1.3762560 sec  
RG 51.55  
DW 21.000 usec  
DE 6.50 usec  
TE 294.5 K  
D1 2.00000000 sec  
D11 0.03000000 sec  
TD0 1  
SFO1 100.6228298 MHz  
NUC1 13C  
P0 3.33 usec  
P1 10.00 usec  
PLW1 87.89900208 W  
SFO2 400.1316005 MHz  
NUC2 1H  
CPDPRG[2] waltz65  
PCPD2 90.00 usec  
PLW2 20.73200035 W  
PLW12 0.25595000 W  
PLW13 0.12874000 W

F2 - Processing parameters  
SI 32768  
SF 100.6127613 MHz  
WDW EM  
SSB 0  
LB 1.00 Hz  
GB 0  
PC 1.40



xy-3-9a

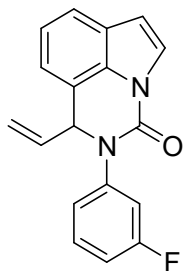

3d

— -111.54

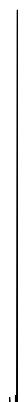

0 -20 -40 -60 -80 -100 -120 -140 -160 -180

ppm

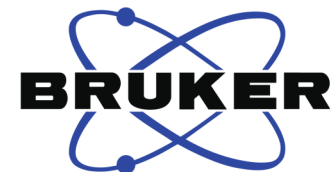

Current Data Parameters  
NAME 2023-6-16  
EXPNO 165  
PROCNO 1

F2 - Acquisition Parameters  
Date\_ 20230616  
Time 11.32  
INSTRUM spect  
PROBHD 5 mm PABBO BB-  
PULPROG zgfhigqn.2  
TD 131072  
SOLVENT CDC13  
NS 16  
DS 4  
SWH 66964.289 Hz  
FIDRES 0.510897 Hz  
AQ 0.9786710 sec  
RG 203  
DW 7.467 usec  
DE 6.50 usec  
TE 296.7 K  
D1 1.00000000 sec  
D11 0.03000000 sec  
D12 0.00002000 sec  
TD0 1

==== CHANNEL f1 =====  
SFO1 282.3761148 MHz  
NUC1 19F  
P1 14.50 usec  
PLW1 10.39999962 W

==== CHANNEL f2 =====  
SFO2 300.1312005 MHz  
NUC2 1H  
CPDPRG[2] waltz16  
PCPD2 90.00 usec  
PLW2 14.00000000 W  
PLW12 0.17284000 W

F2 - Processing parameters  
SI 65536  
SF 282.4043552 MHz  
WDW EM  
SSB 0  
LB 0.30 Hz  
GB 0  
PC 1.00

XY-3-9-B-H

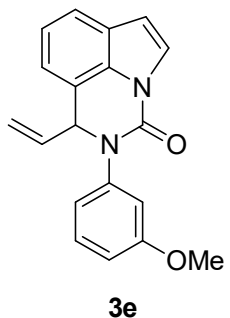

7.742  
7.733  
7.526  
7.506  
7.370  
7.350  
7.331  
7.260  
7.255  
7.236  
7.216  
7.014  
6.996  
6.969  
6.948  
6.914  
6.894  
6.888  
6.651  
6.642  
6.005  
5.984  
5.982  
5.962  
5.942  
5.939  
5.918  
5.650  
5.629  
5.107  
5.103  
5.077  
5.066  
3.822

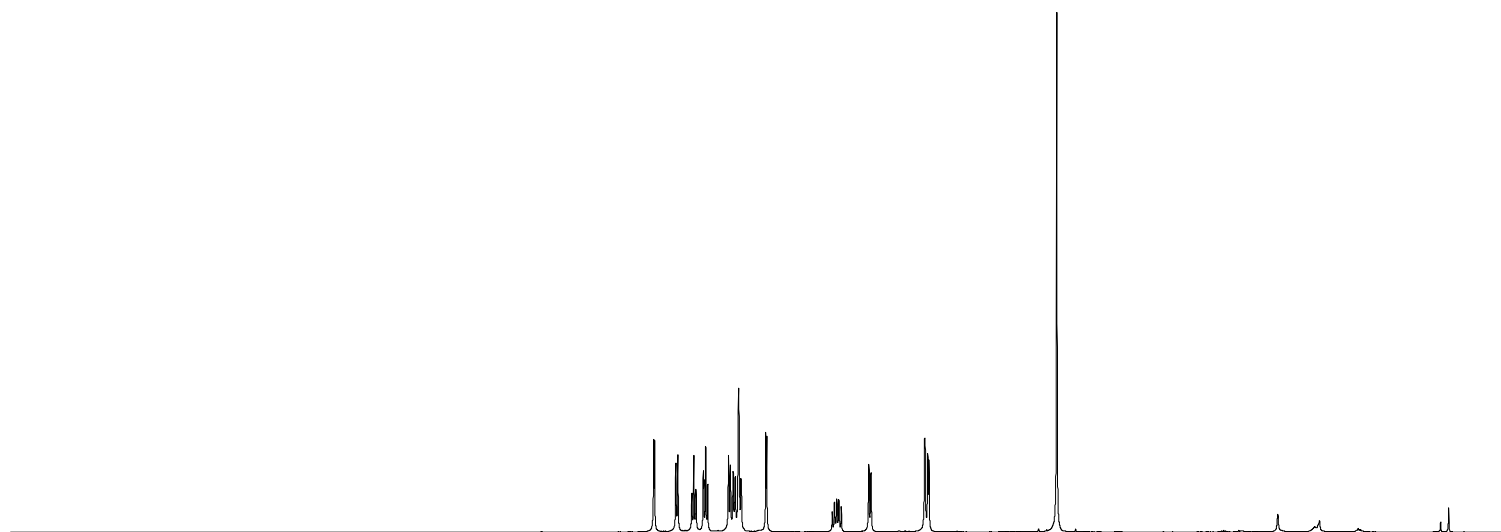

0.91  
0.94  
0.98  
0.99  
4.00  
0.91  
0.98  
1.00  
2.05  
3.03



Current Data Parameters  
NAME Scopel  
EXPNO 2  
PROCNO 1

F2 - Acquisition Parameters  
Date\_ 20230311  
Time 1.03 h  
INSTRUM Avance  
PROBHD z116098\_0833 (  
PULPROG zg30  
TD 65536  
SOLVENT CDC13  
NS 16  
DS 2  
SWH 8196.722 Hz  
FIDRES 0.250144 Hz  
AQ 3.9976959 sec  
RG 100.16  
DW 61.000 usec  
DE 13.54 usec  
TE 293.3 K  
D1 1.00000000 sec  
TD0 1  
SFO1 400.1324708 MHz  
NUC1 1H  
P0 3.33 usec  
P1 10.00 usec  
PLW1 20.73200035 W

F2 - Processing parameters  
SI 65536  
SF 400.1300098 MHz  
WDW EM  
SSB 0  
LB 0.30 Hz  
GB 0  
PC 1.00

XY-3-9-B-C

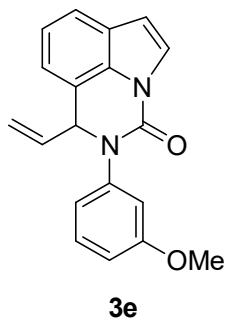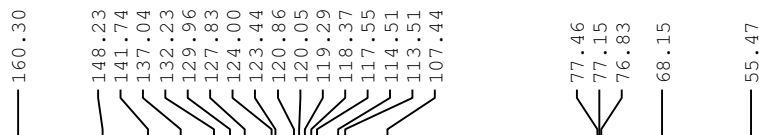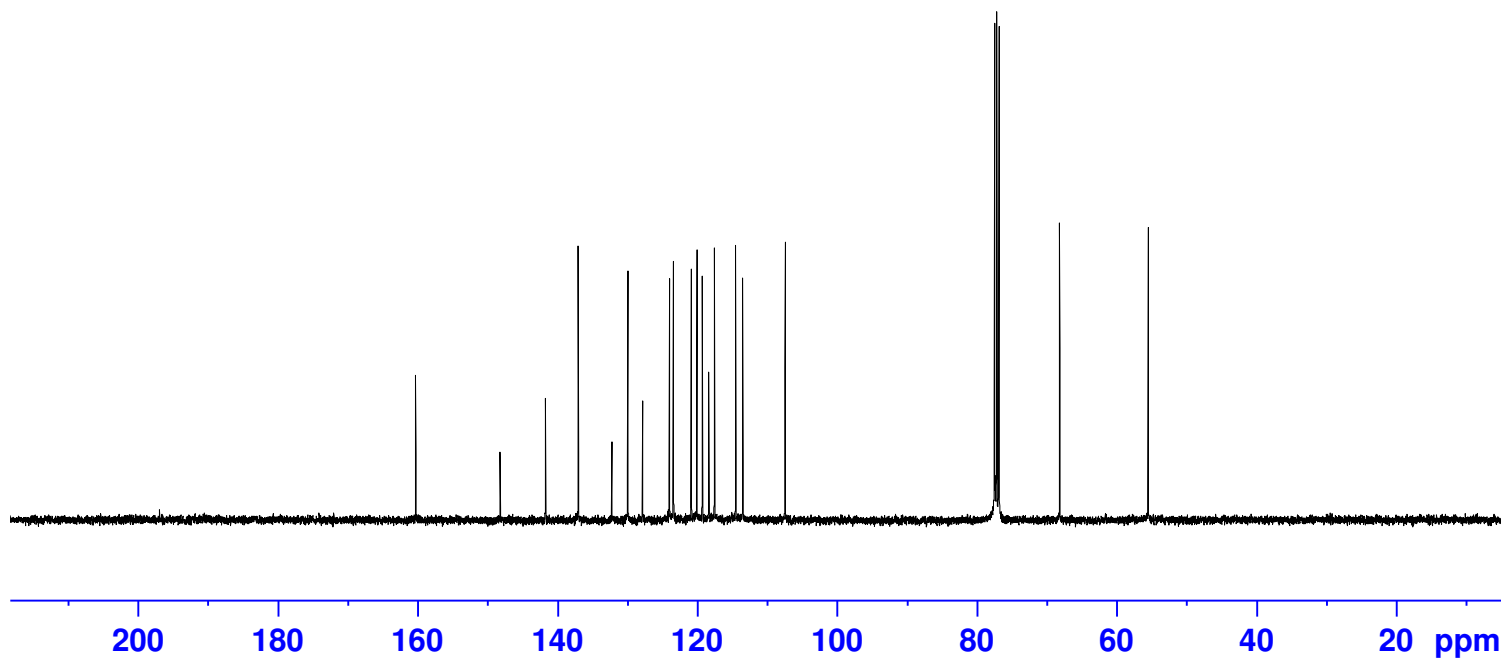

Current Data Parameters  
NAME 2023-3-16  
EXPNO 1  
PROCNO 1

F2 - Acquisition Parameters  
Date\_ 20230315  
Time 0.08 h  
INSTRUM Avance  
PROBHD z116098\_0833 (  
PULPROG zgpg30  
TD 65536  
SOLVENT CDC13  
NS 500  
DS 4  
SWH 23809.523 Hz  
FIDRES 0.726609 Hz  
AQ 1.3762560 sec  
RG 50.1934  
DW 21.000 usec  
DE 6.50 usec  
TE 294.5 K  
D1 2.00000000 sec  
D11 0.03000000 sec  
TD0 1  
SFO1 100.6228298 MHz  
NUC1 13C  
P0 3.33 usec  
P1 10.00 usec  
PLW1 87.89900208 W  
SFO2 400.1316005 MHz  
NUC2 1H  
CPDPRG[2] waltz65  
PCPD2 90.00 usec  
PLW2 20.73200035 W  
PLW12 0.25595000 W  
PLW13 0.12874000 W

F2 - Processing parameters  
SI 32768  
SF 100.6127635 MHz  
WDW EM  
SSB 0  
LB 1.00 Hz  
GB 0  
PC 1.40

XY-3-25-A-H

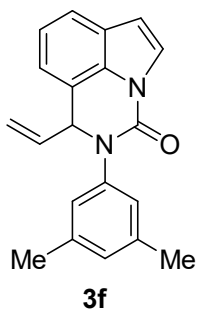

7.752  
7.743  
7.531  
7.511  
7.260  
7.239  
7.220  
7.016  
6.991  
6.651  
6.643  
6.014  
5.993  
5.989  
5.972  
5.968  
5.952  
5.947  
5.926  
5.637  
5.616  
5.106  
5.081  
5.062

2.361



Current Data Parameters  
NAME 2023-3-24  
EXPNO 3  
PROCNO 1

F2 - Acquisition Parameters  
Date\_ 20230325  
Time 3.56 h  
INSTRUM Avance  
PROBHD z116098\_0833 (  
PULPROG zg30  
TD 65536  
SOLVENT CDC13  
NS 16  
DS 2  
SWH 8196.722 Hz  
FIDRES 0.250144 Hz  
AQ 3.9976959 sec  
RG 51.2821  
DW 61.000 usec  
DE 13.54 usec  
TE 293.2 K  
D1 1.00000000 sec  
TD0 1  
SFO1 400.1324708 MHz  
NUC1 1H  
P0 3.33 usec  
P1 10.00 usec  
PLW1 20.73200035 W

F2 - Processing parameters  
SI 65536  
SF 400.1300099 MHz  
WDW EM  
SSB 0  
LB 0.30 Hz  
GB 0  
PC 1.00

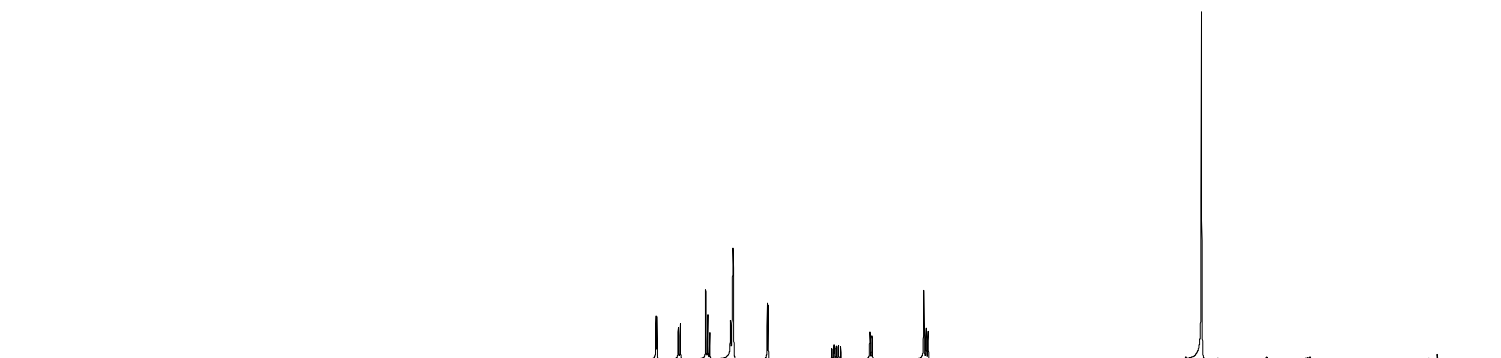

13 12 11 10 9 8 7 6 5 4 3 2 1 ppm

1.00  
1.04  
1.09  
4.13  
0.94  
1.11  
1.01  
0.94  
0.91  
5.99

XY-3-25-A-C

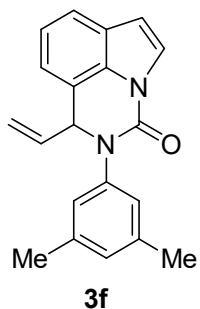

148.36  
140.37  
138.96  
137.18  
132.26  
129.59  
127.79  
126.25  
123.99  
123.35  
119.95  
119.23  
118.45  
117.33  
107.27

77.47  
77.15  
76.83  
68.06

21.38

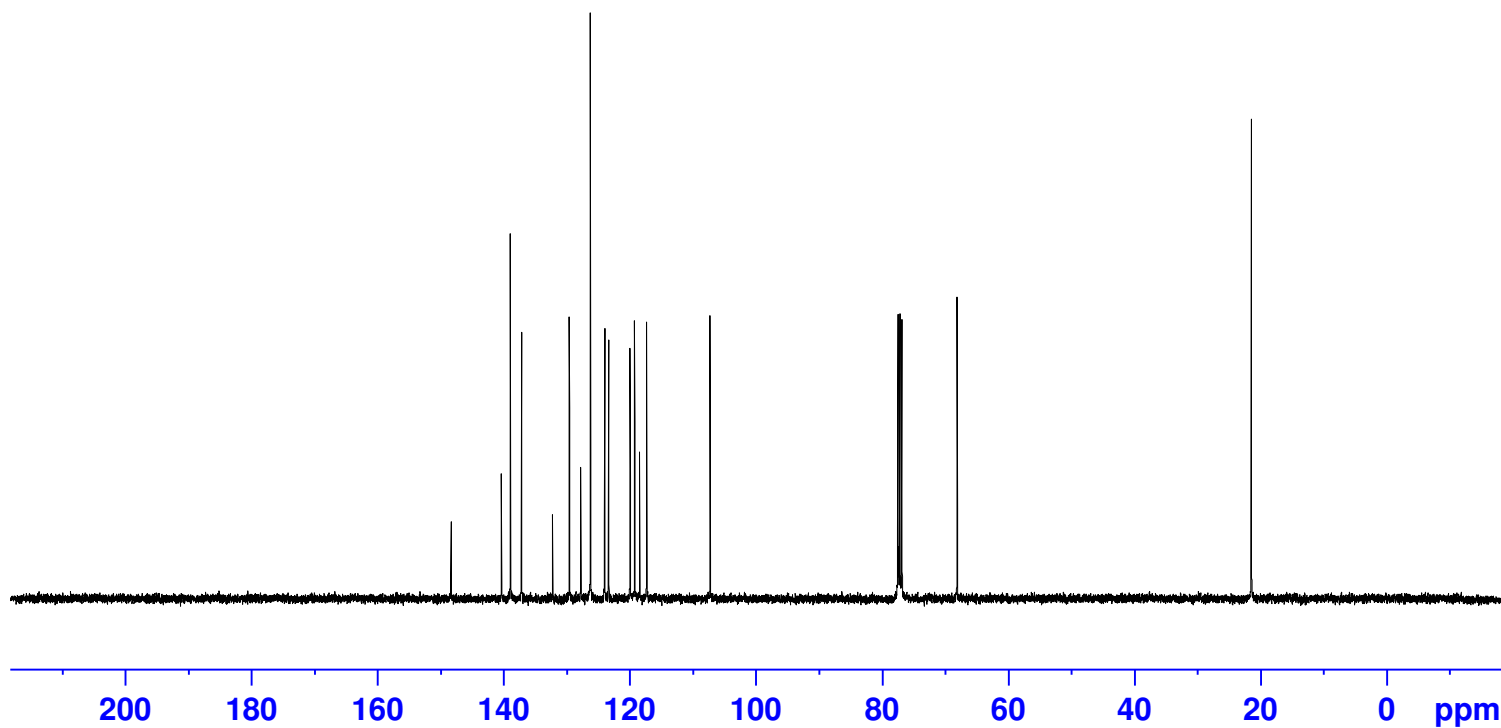

Current Data Parameters  
NAME 2023-3-24  
EXPNO 4  
PROCNO 1

F2 - Acquisition Parameters  
Date\_ 20230325  
Time 4.09 h  
INSTRUM Avance  
PROBHD z116098\_0833 (  
PULPROG zgpg30  
TD 65536  
SOLVENT CDC13  
NS 200  
DS 4  
SWH 23809.523 Hz  
FIDRES 0.726609 Hz  
AQ 1.3762560 sec  
RG 50.1934  
DW 21.000 usec  
DE 6.50 usec  
TE 293.6 K  
D1 2.00000000 sec  
D11 0.03000000 sec  
TD0 1  
SFO1 100.6228298 MHz  
NUC1 13C  
P0 3.33 usec  
P1 10.00 usec  
PLW1 87.89900208 W  
SFO2 400.1316005 MHz  
NUC2 1H  
CPDPRG[2] waltz65  
PCPD2 90.00 usec  
PLW2 20.73200035 W  
PLW12 0.25595000 W  
PLW13 0.12874000 W

F2 - Processing parameters  
SI 32768  
SF 100.6127665 MHz  
WDW EM  
SSB 0  
LB 1.00 Hz  
GB 0  
PC 1.40

XY-3-21-A-H

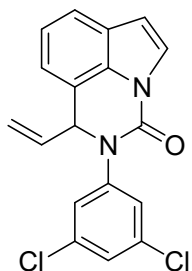

3g

7.708  
7.699  
7.533  
7.513  
7.351  
7.346  
7.342  
7.300  
7.296  
7.267  
7.260  
7.248  
7.228  
7.017  
6.999  
6.669  
6.660  
5.955  
5.934  
5.931  
5.913  
5.910  
5.892  
5.889  
5.868  
5.628  
5.607  
5.170  
5.160  
5.145  
5.118

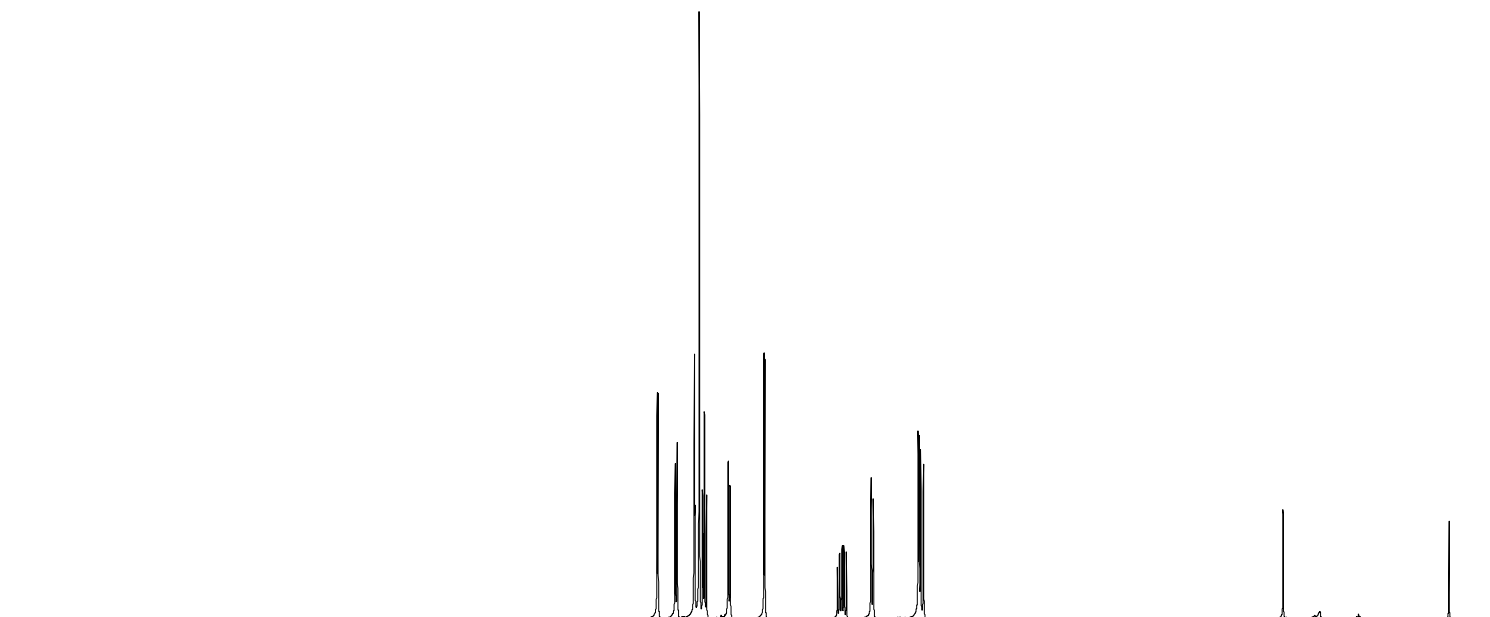

1.00  
1.03  
1.00  
1.99  
1.03  
0.98  
1.00  
1.06  
1.07  
2.14



Current Data Parameters  
NAME 2023-3-20  
EXPNO 1  
PROCNO 1

F2 - Acquisition Parameters  
Date\_ 20230321  
Time 2.13 h  
INSTRUM Avance  
PROBHD z116098\_0833 (  
PULPROG zg30  
TD 65536  
SOLVENT CDC13  
NS 16  
DS 2  
SWH 8196.722 Hz  
FIDRES 0.250144 Hz  
AQ 3.9976959 sec  
RG 101  
DW 61.000 usec  
DE 13.54 usec  
TE 293.6 K  
D1 1.00000000 sec  
TD0 1  
SFO1 400.1324708 MHz  
NUC1 1H  
P0 3.33 usec  
P1 10.00 usec  
PLW1 20.73200035 W

F2 - Processing parameters  
SI 65536  
SF 400.1300099 MHz  
WDW EM  
SSB 0  
LB 0.30 Hz  
GB 0  
PC 1.00

XY-3-21-A-C

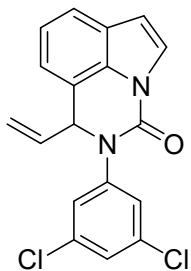

3g

147.97  
142.51  
136.36  
135.33  
131.99  
128.11  
127.96  
127.52  
123.90  
123.77  
120.39  
119.47  
118.42  
117.84  
108.12

77.47  
77.15  
76.83  
68.16

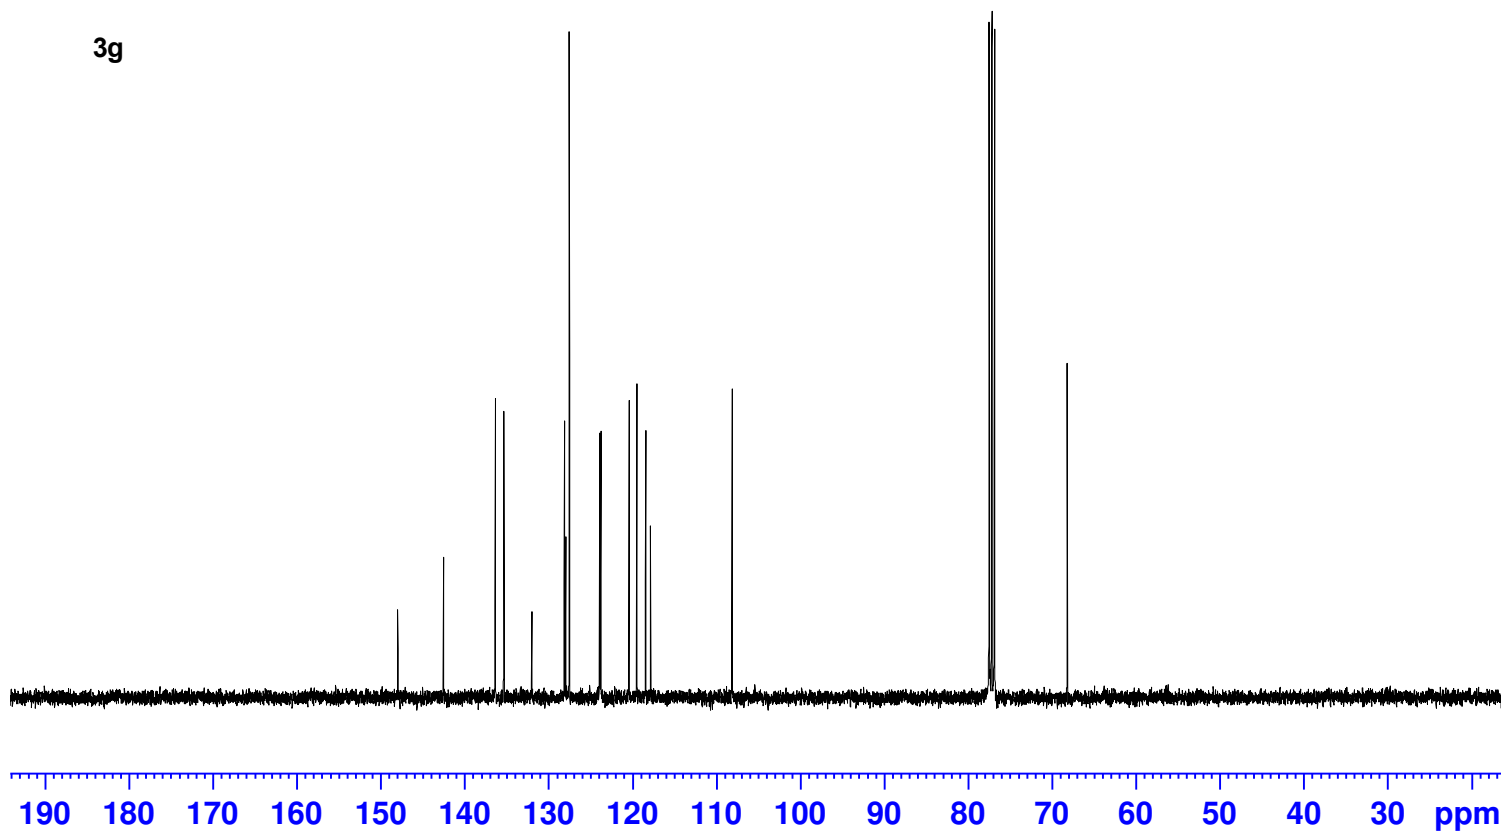

Current Data Parameters  
NAME 2023-3-20  
EXPNO 2  
PROCNO 1

F2 - Acquisition Parameters  
Date\_ 20230321  
Time 2.25 h  
INSTRUM Avance  
PROBHD z116098\_0833 (  
PULPROG zgpg30  
TD 65536  
SOLVENT CDC13  
NS 200  
DS 4  
SWH 23809.523 Hz  
FIDRES 0.726609 Hz  
AQ 1.3762560 sec  
RG 50.1934  
DW 21.000 usec  
DE 6.50 usec  
TE 294.2 K  
D1 2.00000000 sec  
D11 0.03000000 sec  
TD0 1  
SFO1 100.6228298 MHz  
NUC1 13C  
P0 3.33 usec  
P1 10.00 usec  
PLW1 87.89900208 W  
SFO2 400.1316005 MHz  
NUC2 1H  
CPDPRG[2] waltz65  
PCPD2 90.00 usec  
PLW2 20.73200035 W  
PLW12 0.25595000 W  
PLW13 0.12874000 W

F2 - Processing parameters  
SI 32768  
SF 100.6127605 MHz  
WDW EM  
SSB 0  
LB 1.00 Hz  
GB 0  
PC 1.40

XY-3-37-H

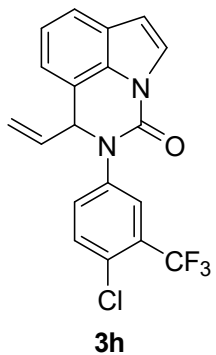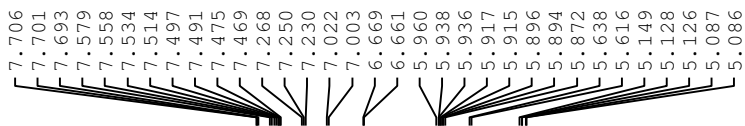

Current Data Parameters  
NAME 2023-4-3  
EXPNO 2  
PROCNO 1

F2 - Acquisition Parameters  
Date\_ 20230404  
Time 1.59 h  
INSTRUM Avance  
PROBHD z116098\_0833 (  
PULPROG zg30  
TD 65536  
SOLVENT CDC13  
NS 16  
DS 2  
SWH 8196.722 Hz  
FIDRES 0.250144 Hz  
AQ 3.9976959 sec  
RG 101  
DW 61.000 usec  
DE 13.54 usec  
TE 293.7 K  
D1 1.00000000 sec  
TD0 1  
SFO1 400.1324708 MHz  
NUC1 1H  
P0 3.33 usec  
P1 10.00 usec  
PLW1 20.73200035 W

F2 - Processing parameters  
SI 65536  
SF 400.1300136 MHz  
WDW EM  
SSB 0  
LB 0.30 Hz  
GB 0  
PC 1.00

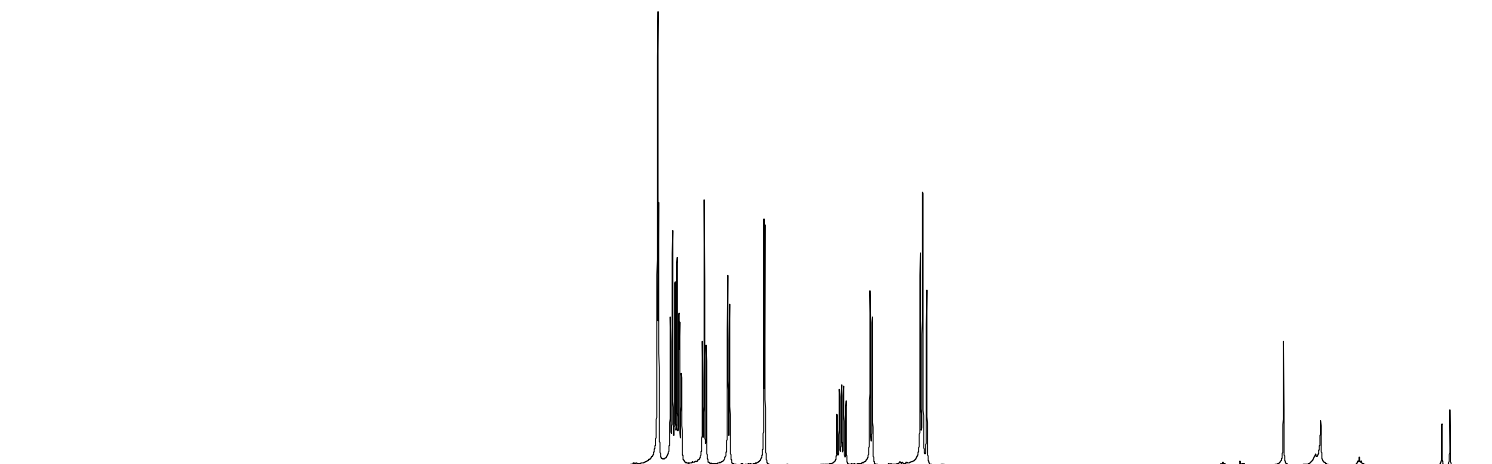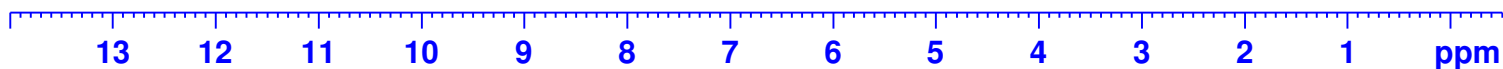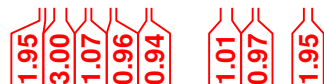



XY-3-37-C

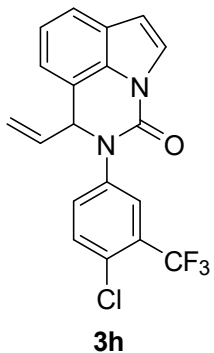

148.14  
139.46  
136.41  
133.37  
132.41  
132.03  
131.40  
129.57  
129.25  
128.00  
127.98  
126.56  
123.88  
123.85  
123.80  
121.13  
120.44  
119.51  
118.51  
118.41  
117.80  
108.16

77.46  
77.15  
76.83  
68.23

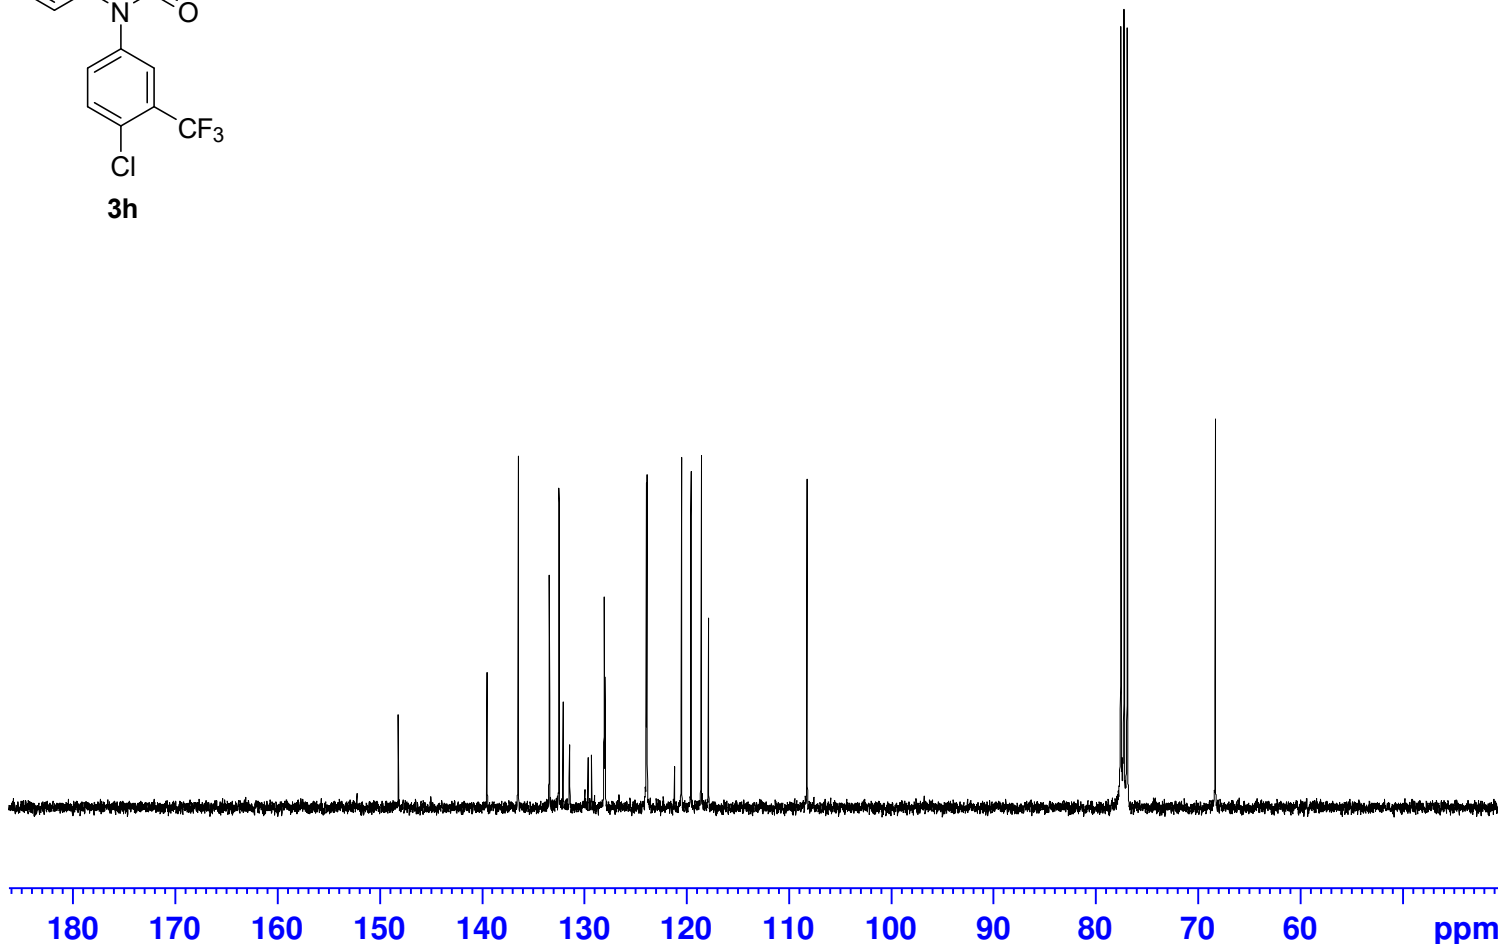

Current Data Parameters  
NAME 2023-4-3  
EXPNO 3  
PROCNO 1

F2 - Acquisition Parameters  
Date\_ 20230404  
Time 2.29 h  
INSTRUM Avance  
PROBHD z116098\_0833 (  
PULPROG zgpg30  
TD 65536  
SOLVENT CDC13  
NS 500  
DS 4  
SWH 23809.523 Hz  
FIDRES 0.726609 Hz  
AQ 1.3762560 sec  
RG 47.4244  
DW 21.000 usec  
DE 6.50 usec  
TE 294.2 K  
D1 2.00000000 sec  
D11 0.03000000 sec  
TD0 1  
SFO1 100.6228298 MHz  
NUC1 13C  
P0 3.33 usec  
P1 10.00 usec  
PLW1 87.89900208 W  
SFO2 400.1316005 MHz  
NUC2 1H  
CPDPRG[2] waltz65  
PCPD2 90.00 usec  
PLW2 20.73200035 W  
PLW12 0.25595000 W  
PLW13 0.12874000 W

F2 - Processing parameters  
SI 32768  
SF 100.6127604 MHz  
WDW EM  
SSB 0  
LB 1.00 Hz  
GB 0  
PC 1.40

xy-3-37

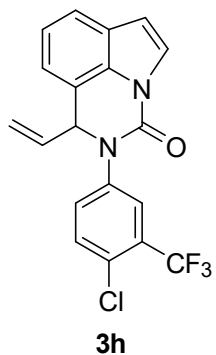

— -62.86



Current Data Parameters  
NAME 2023-4-13  
EXPNO 44  
PROCNO 1

F2 - Acquisition Parameters  
Date\_ 20230412  
Time 16.54  
INSTRUM spect  
PROBHD 5 mm PABBO BB-  
PULPROG zgfhigqn.2  
TD 131072  
SOLVENT CDC13  
NS 16  
DS 4  
SWH 66964.289 Hz  
FIDRES 0.510897 Hz  
AQ 0.9786710 sec  
RG 203  
DW 7.467 usec  
DE 6.50 usec  
TE 292.5 K  
D1 1.00000000 sec  
D11 0.03000000 sec  
D12 0.00002000 sec  
TD0 1

==== CHANNEL f1 =====  
SFO1 282.3761148 MHz  
NUC1 19F  
P1 14.50 usec  
PLW1 10.39999962 W

==== CHANNEL f2 =====  
SFO2 300.1312005 MHz  
NUC2 1H  
CPDPRG[2] waltz16  
PCPD2 90.00 usec  
PLW2 14.00000000 W  
PLW12 0.17284000 W

F2 - Processing parameters  
SI 65536  
SF 282.4043552 MHz  
WDW EM  
SSB 0  
LB 0.30 Hz  
GB 0  
PC 1.00

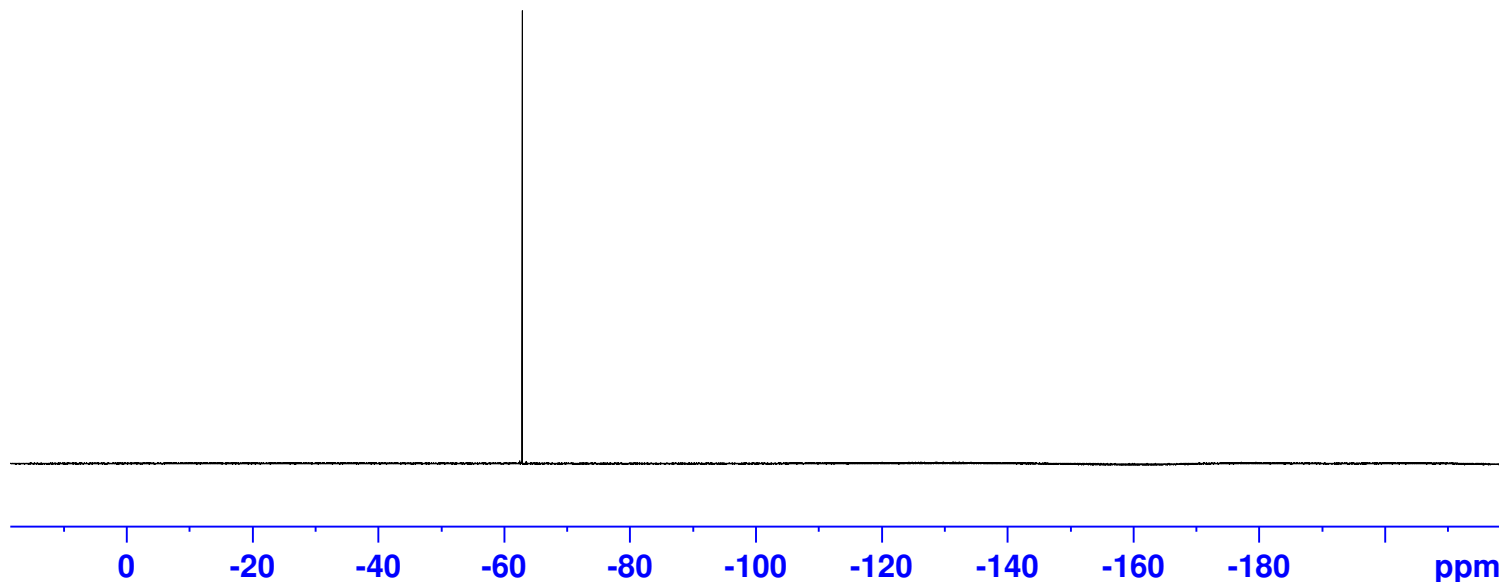

XY-3-38-H

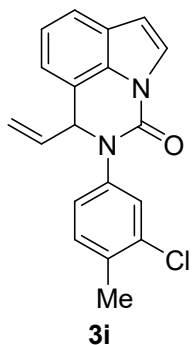

7.726  
7.717  
7.526  
7.507  
7.376  
7.371  
7.305  
7.285  
7.260  
7.257  
7.237  
7.218  
7.177  
7.172  
7.157  
7.152  
7.010  
6.991  
6.654  
6.645  
5.976  
5.955  
5.951  
5.934  
5.930  
5.913  
5.909  
5.888  
5.619  
5.598  
5.125  
5.116  
5.100  
5.074  
2.405

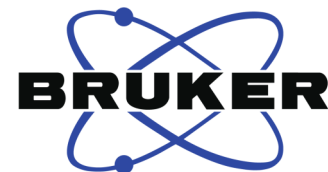

Current Data Parameters  
NAME 2023-3-31  
EXPNO 1  
PROCNO 1

F2 - Acquisition Parameters  
Date\_ 20230401  
Time 7.37 h  
INSTRUM Avance  
PROBHD z116098\_0833 (  
PULPROG zg30  
TD 65536  
SOLVENT CDC13  
NS 16  
DS 2  
SWH 8196.722 Hz  
FIDRES 0.250144 Hz  
AQ 3.9976959 sec  
RG 93.7735  
DW 61.000 usec  
DE 13.54 usec  
TE 293.4 K  
D1 1.00000000 sec  
TD0 1  
SFO1 400.1324708 MHz  
NUC1 1H  
P0 3.33 usec  
P1 10.00 usec  
PLW1 20.73200035 W

F2 - Processing parameters  
SI 65536  
SF 400.1300101 MHz  
WDW EM  
SSB 0  
LB 0.30 Hz  
GB 0  
PC 1.00

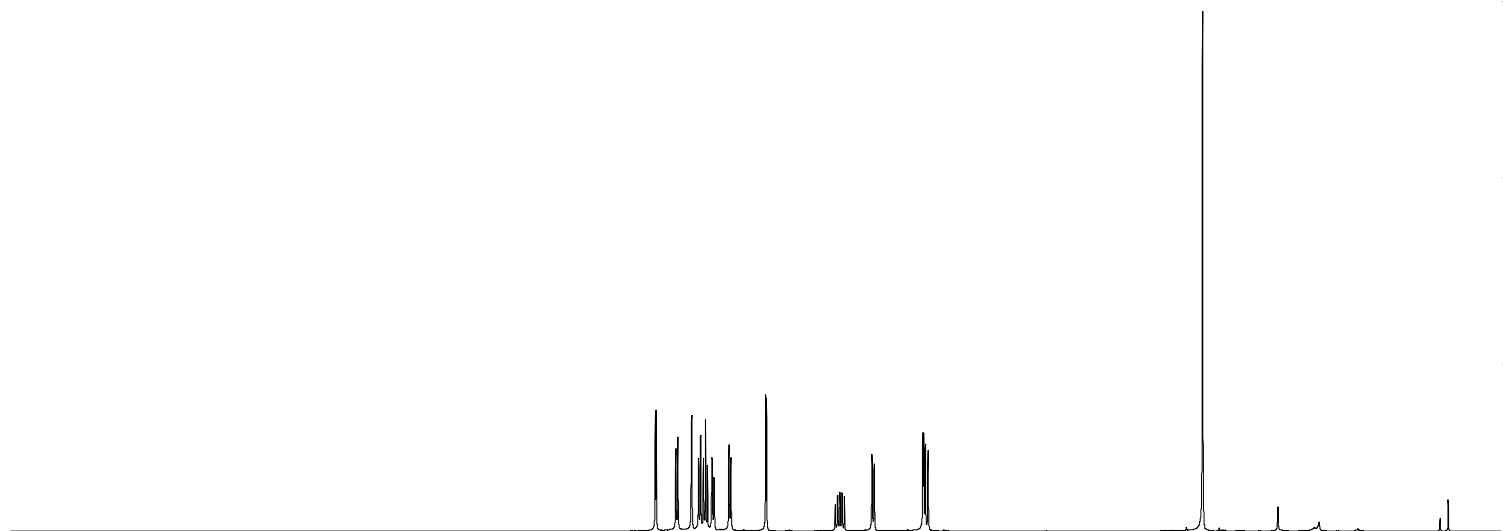

13 12 11 10 9 8 7 6 5 4 3 2 1 ppm

0.96  
0.96  
0.94  
0.98  
1.00  
0.96  
0.98  
0.94  
1.00  
0.98  
1.00  
0.95

2.99

XY-3-38-C

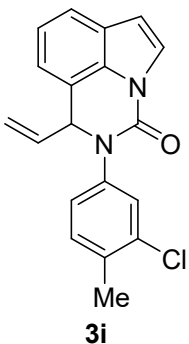

148.23  
139.24  
136.79  
135.82  
134.66  
132.14  
131.40  
129.24  
127.88  
127.05  
123.94  
123.53  
120.15  
119.36  
118.17  
117.95  
107.62

77.46  
77.15  
76.83  
68.22

19.90

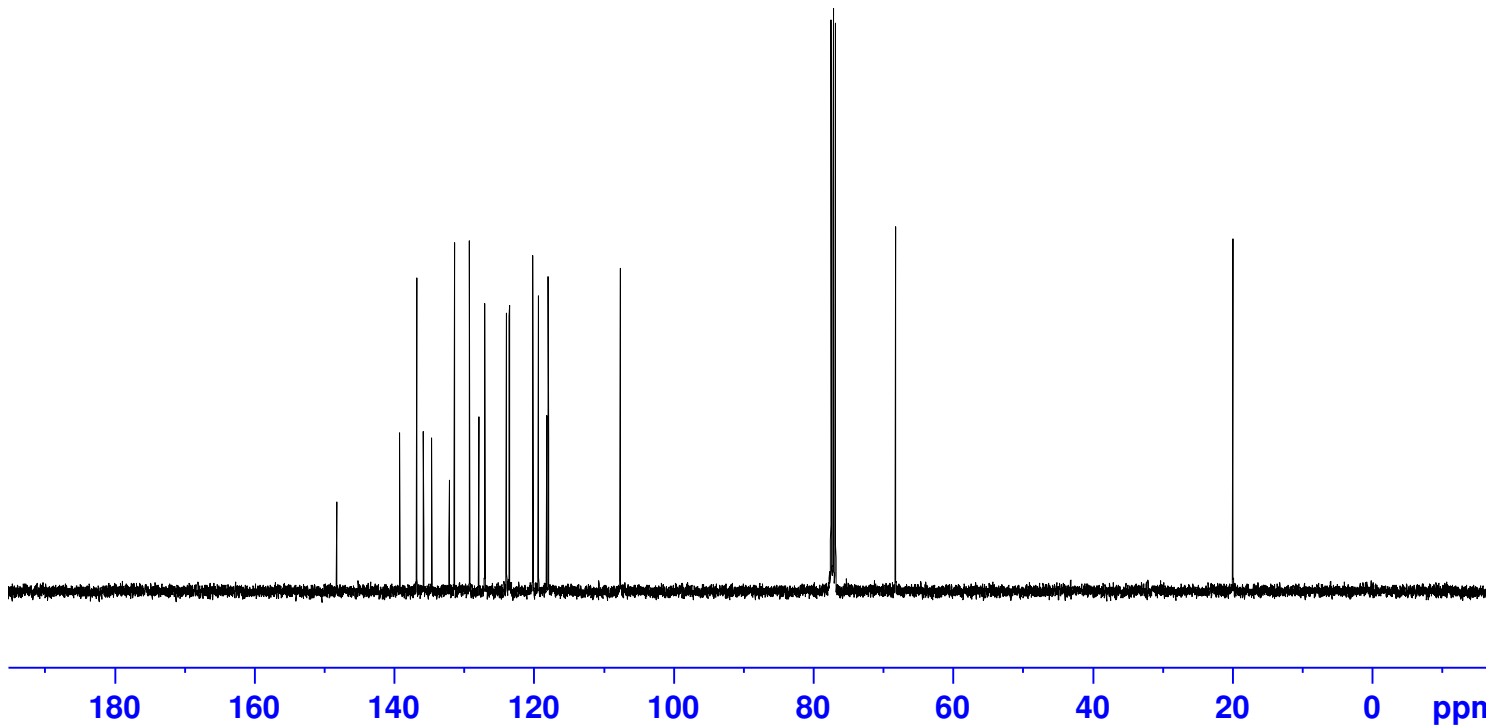

Current Data Parameters  
NAME 2023-3-31  
EXPNO 2  
PROCNO 1

F2 - Acquisition Parameters  
Date\_ 20230401  
Time 7.49 h  
INSTRUM Avance  
PROBHD z116098\_0833 (  
PULPROG zgpg30  
TD 65536  
SOLVENT CDC13  
NS 200  
DS 4  
SWH 23809.523 Hz  
FIDRES 0.726609 Hz  
AQ 1.3762560 sec  
RG 50.1934  
DW 21.000 usec  
DE 6.50 usec  
TE 294.1 K  
D1 2.00000000 sec  
D11 0.03000000 sec  
TD0 1  
SFO1 100.6228298 MHz  
NUC1 13C  
P0 3.33 usec  
P1 10.00 usec  
PLW1 87.89900208 W  
SFO2 400.1316005 MHz  
NUC2 1H  
CPDPRG[2] waltz65  
PCPD2 90.00 usec  
PLW2 20.73200035 W  
PLW12 0.25595000 W  
PLW13 0.12874000 W

F2 - Processing parameters  
SI 32768  
SF 100.6127632 MHz  
WDW EM  
SSB 0  
LB 1.00 Hz  
GB 0  
PC 1.40

XY-3-89-H

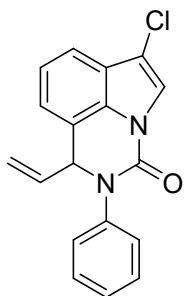

3j

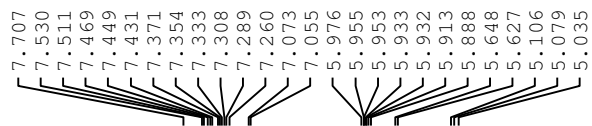

Current Data Parameters  
NAME 2023-5-17  
EXPNO 1  
PROCNO 1

F2 - Acquisition Parameters  
Date\_ 20230518  
Time 3.07 h  
INSTRUM Avance  
PROBHD z116098\_0833 (  
PULPROG zg30  
TD 65536  
SOLVENT CDC13  
NS 16  
DS 2  
SWH 8196.722 Hz  
FIDRES 0.250144 Hz  
AQ 3.9976959 sec  
RG 101  
DW 61.000 usec  
DE 13.54 usec  
TE 294.1 K  
D1 1.00000000 sec  
TD0 1  
SFO1 400.1324708 MHz  
NUC1 1H  
P0 3.33 usec  
P1 10.00 usec  
PLW1 20.73200035 W

F2 - Processing parameters  
SI 65536  
SF 400.1300099 MHz  
WDW EM  
SSB 0  
LB 0.30 Hz  
GB 0  
PC 1.00

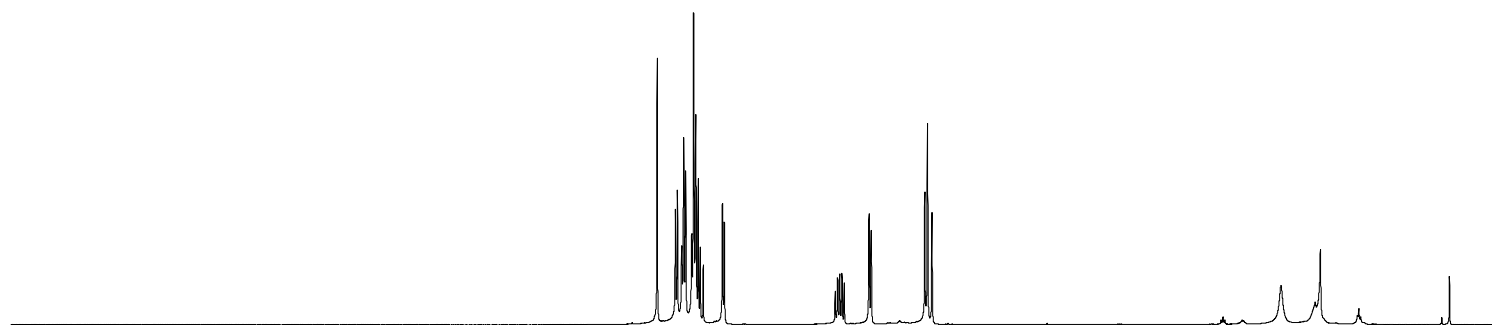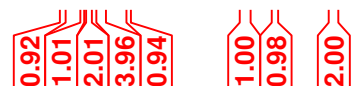

XY-3-89-H

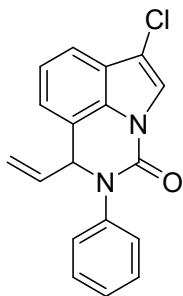

3j

147.42  
140.38  
136.63  
131.42  
129.46  
128.63  
127.97  
125.56  
123.99  
120.50  
120.46  
118.61  
118.05  
117.99  
112.63

77.46  
77.15  
76.83  
68.04

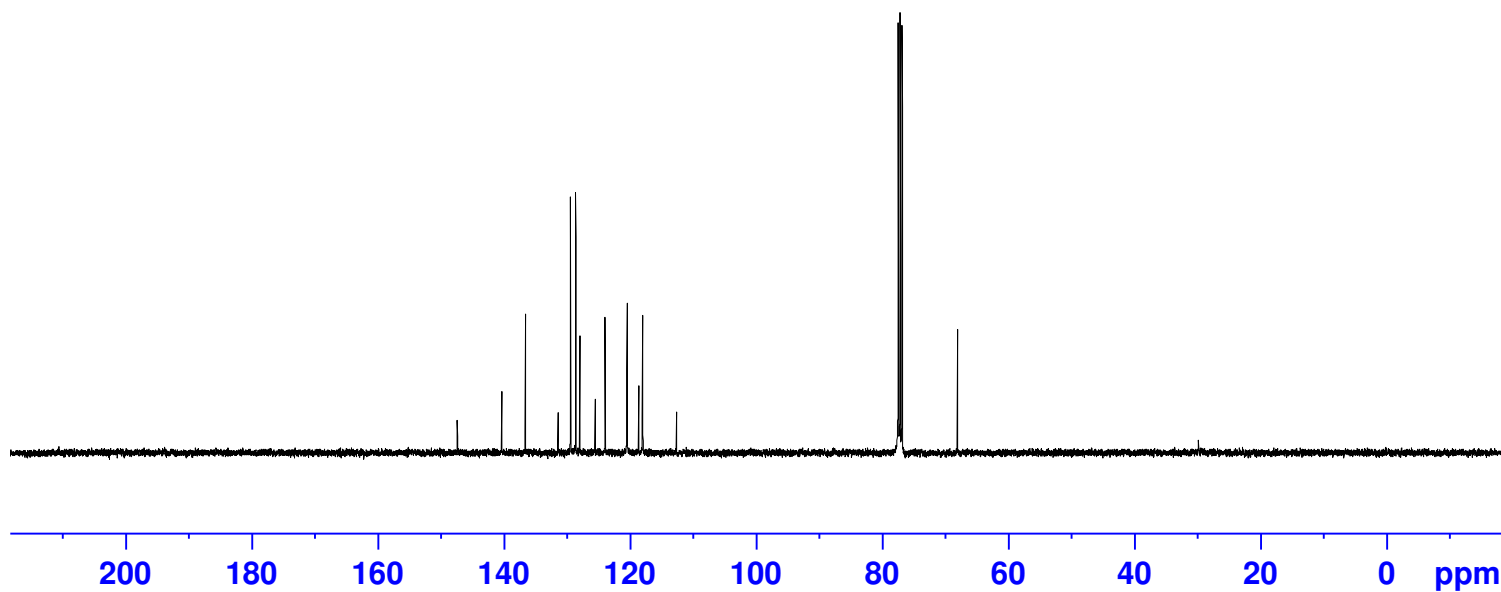

Current Data Parameters  
NAME 2023-5-17  
EXPNO 2  
PROCNO 1

F2 - Acquisition Parameters  
Date\_ 20230518  
Time 3.36 h  
INSTRUM Avance  
PROBHD z116098\_0833 (  
PULPROG zgpg30  
TD 65536  
SOLVENT CDC13  
NS 500  
DS 4  
SWH 23809.523 Hz  
FIDRES 0.726609 Hz  
AQ 1.3762560 sec  
RG 43.5965  
DW 21.000 usec  
DE 6.50 usec  
TE 294.5 K  
D1 2.00000000 sec  
D11 0.03000000 sec  
TD0 1  
SFO1 100.6228298 MHz  
NUC1 13C  
P0 3.33 usec  
P1 10.00 usec  
PLW1 87.89900208 W  
SFO2 400.1316005 MHz  
NUC2 1H  
CPDPRG[2] waltz65  
PCPD2 90.00 usec  
PLW2 20.73200035 W  
PLW12 0.25595000 W  
PLW13 0.12874000 W

F2 - Processing parameters  
SI 32768  
SF 100.6127599 MHz  
WDW EM  
SSB 0  
LB 1.00 Hz  
GB 0  
PC 1.40

XY-3-25-B-H

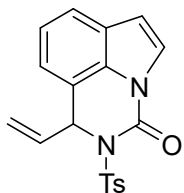

3k

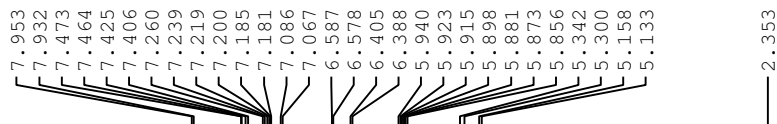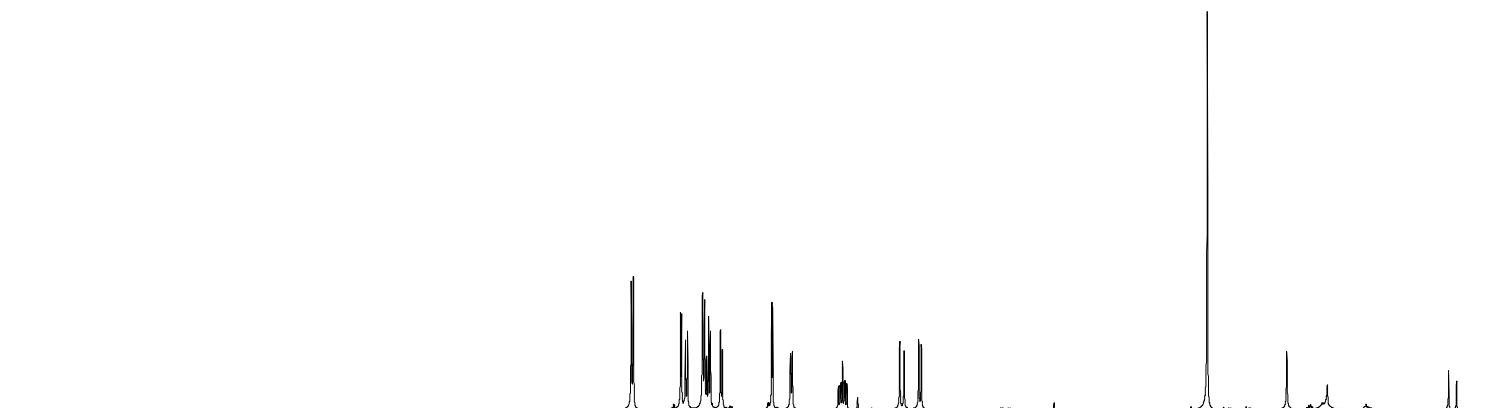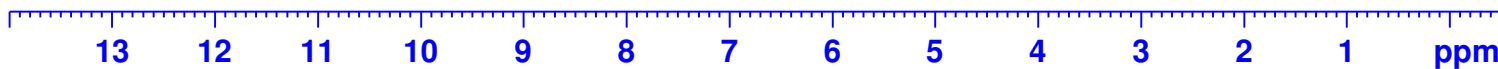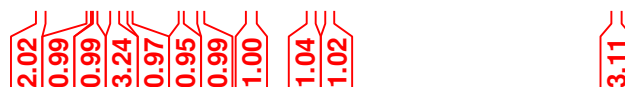

Current Data Parameters  
NAME 2023-3-22  
EXPNO 1  
PROCNO 1

F2 - Acquisition Parameters  
Date\_ 20230322  
Time 21.11 h  
INSTRUM Avance  
PROBHD Z116098\_0833 (  
PULPROG zg30  
TD 65536  
SOLVENT CDC13  
NS 16  
DS 2  
SWH 8196.722 Hz  
FIDRES 0.250144 Hz  
AQ 3.9976959 sec  
RG 101  
DW 61.000 usec  
DE 13.54 usec  
TE 293.2 K  
D1 1.00000000 sec  
TD0 1  
SFO1 400.1324708 MHz  
NUC1 1H  
P0 3.33 usec  
P1 10.00 usec  
PLW1 20.73200035 W

F2 - Processing parameters  
SI 65536  
SF 400.1300397 MHz  
WDW EM  
SSB 0  
LB 0.30 Hz  
GB 0  
PC 1.00

XY-3-25-B-C

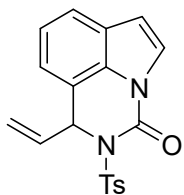

3k

145.90  
145.17  
136.77  
136.12  
131.85  
129.56  
129.37  
127.67  
124.34  
123.65  
120.56  
119.92  
118.04  
117.48  
110.15

77.47  
77.15  
76.83

63.07

21.80

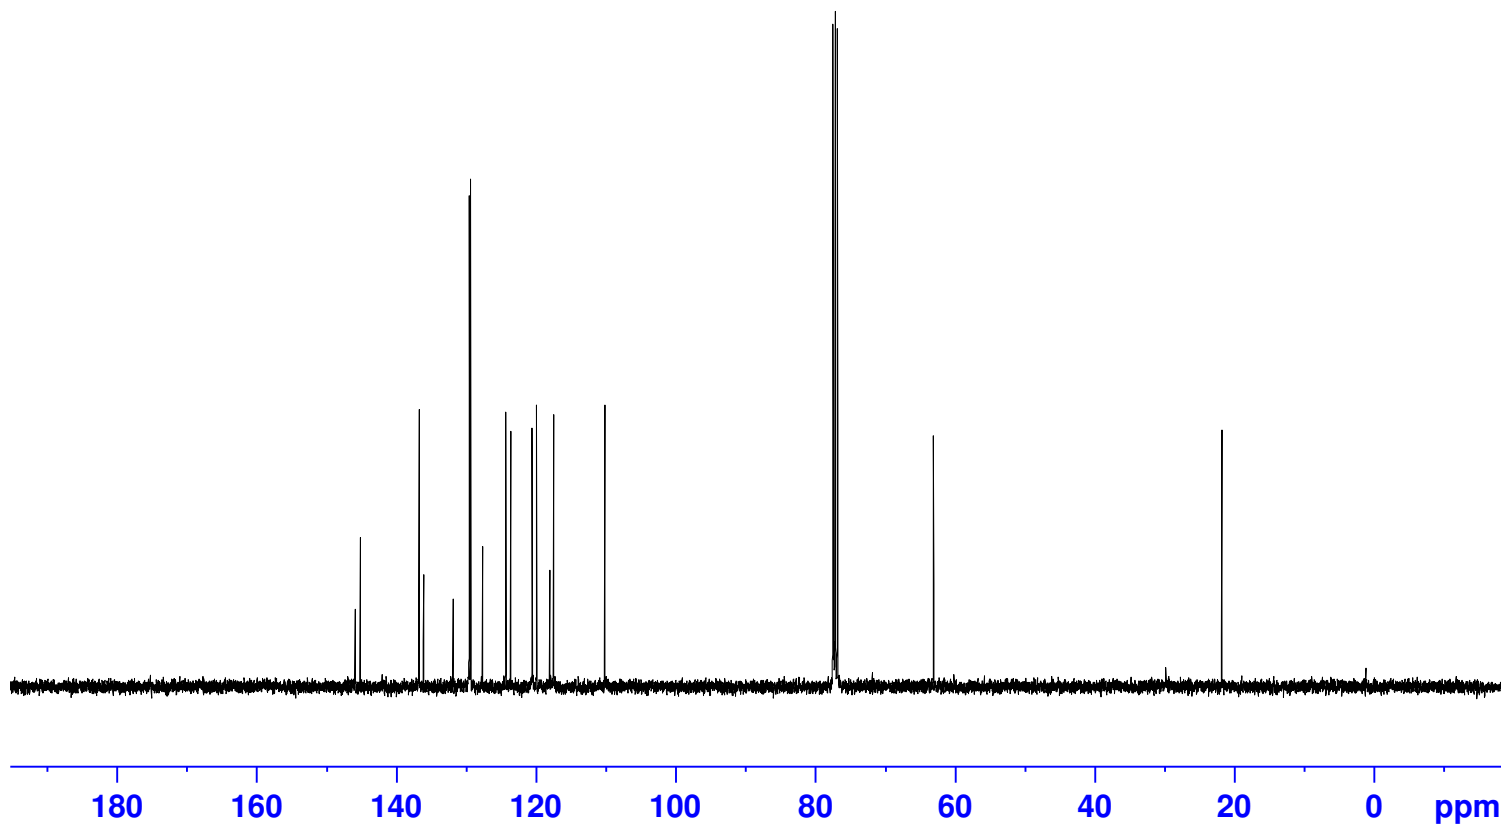

Current Data Parameters  
NAME 2023-3-23  
EXPNO 1  
PROCNO 1

F2 - Acquisition Parameters  
Date\_ 20230324  
Time 0.41 h  
INSTRUM Avance  
PROBHD z116098\_0833 (  
PULPROG zgpg30  
TD 65536  
SOLVENT CDCl3  
NS 200  
DS 4  
SWH 23809.523 Hz  
FIDRES 0.726609 Hz  
AQ 1.3762560 sec  
RG 48.6724  
DW 21.000 usec  
DE 6.50 usec  
TE 294.0 K  
D1 2.00000000 sec  
D11 0.03000000 sec  
TD0 1  
SFO1 100.6228298 MHz  
NUC1 13C  
P0 3.33 usec  
P1 10.00 usec  
PLW1 87.89900208 W  
SFO2 400.1316005 MHz  
NUC2 1H  
CPDPRG[2] waltz65  
PCPD2 90.00 usec  
PLW2 20.73200035 W  
PLW12 0.25595000 W  
PLW13 0.12874000 W

F2 - Processing parameters  
SI 32768  
SF 100.6127619 MHz  
WDW EM  
SSB 0  
LB 1.00 Hz  
GB 0  
PC 1.40



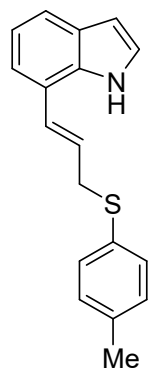

4a

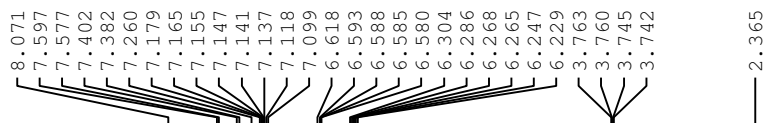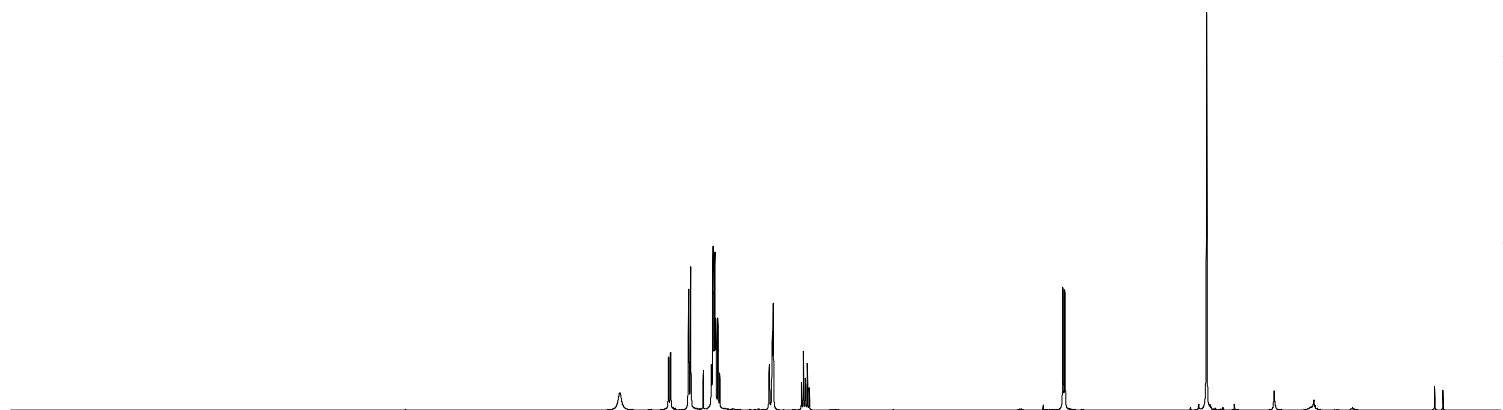

13 12 11 10 9 8 7 6 5 4 3 2 1 ppm

0.95  
0.95  
1.84  
5.00  
1.91  
0.99

1.99

3.10



Current Data Parameters  
 NAME 2023-5-4  
 EXPNO 4  
 PROCNO 1

F2 - Acquisition Parameters  
 Date\_ 20230504  
 Time 17.42 h  
 INSTRUM Avance  
 PROBHD z116098\_0833 (  
 PULPROG zg30  
 TD 65536  
 SOLVENT CDCl3  
 NS 16  
 DS 2  
 SWH 8196.722 Hz  
 FIDRES 0.250144 Hz  
 AQ 3.9976959 sec  
 RG 54.0541  
 DW 61.000 usec  
 DE 13.54 usec  
 TE 294.6 K  
 D1 1.00000000 sec  
 TD0 1  
 SFO1 400.1324708 MHz  
 NUC1 1H  
 P0 3.33 usec  
 P1 10.00 usec  
 PLW1 20.73200035 W

F2 - Processing parameters  
 SI 65536  
 SF 400.1300096 MHz  
 WDW EM  
 SSB 0  
 LB 0.30 Hz  
 GB 0  
 PC 1.00

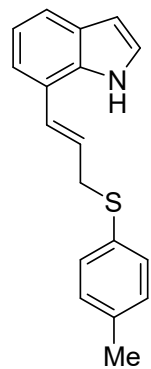

4a

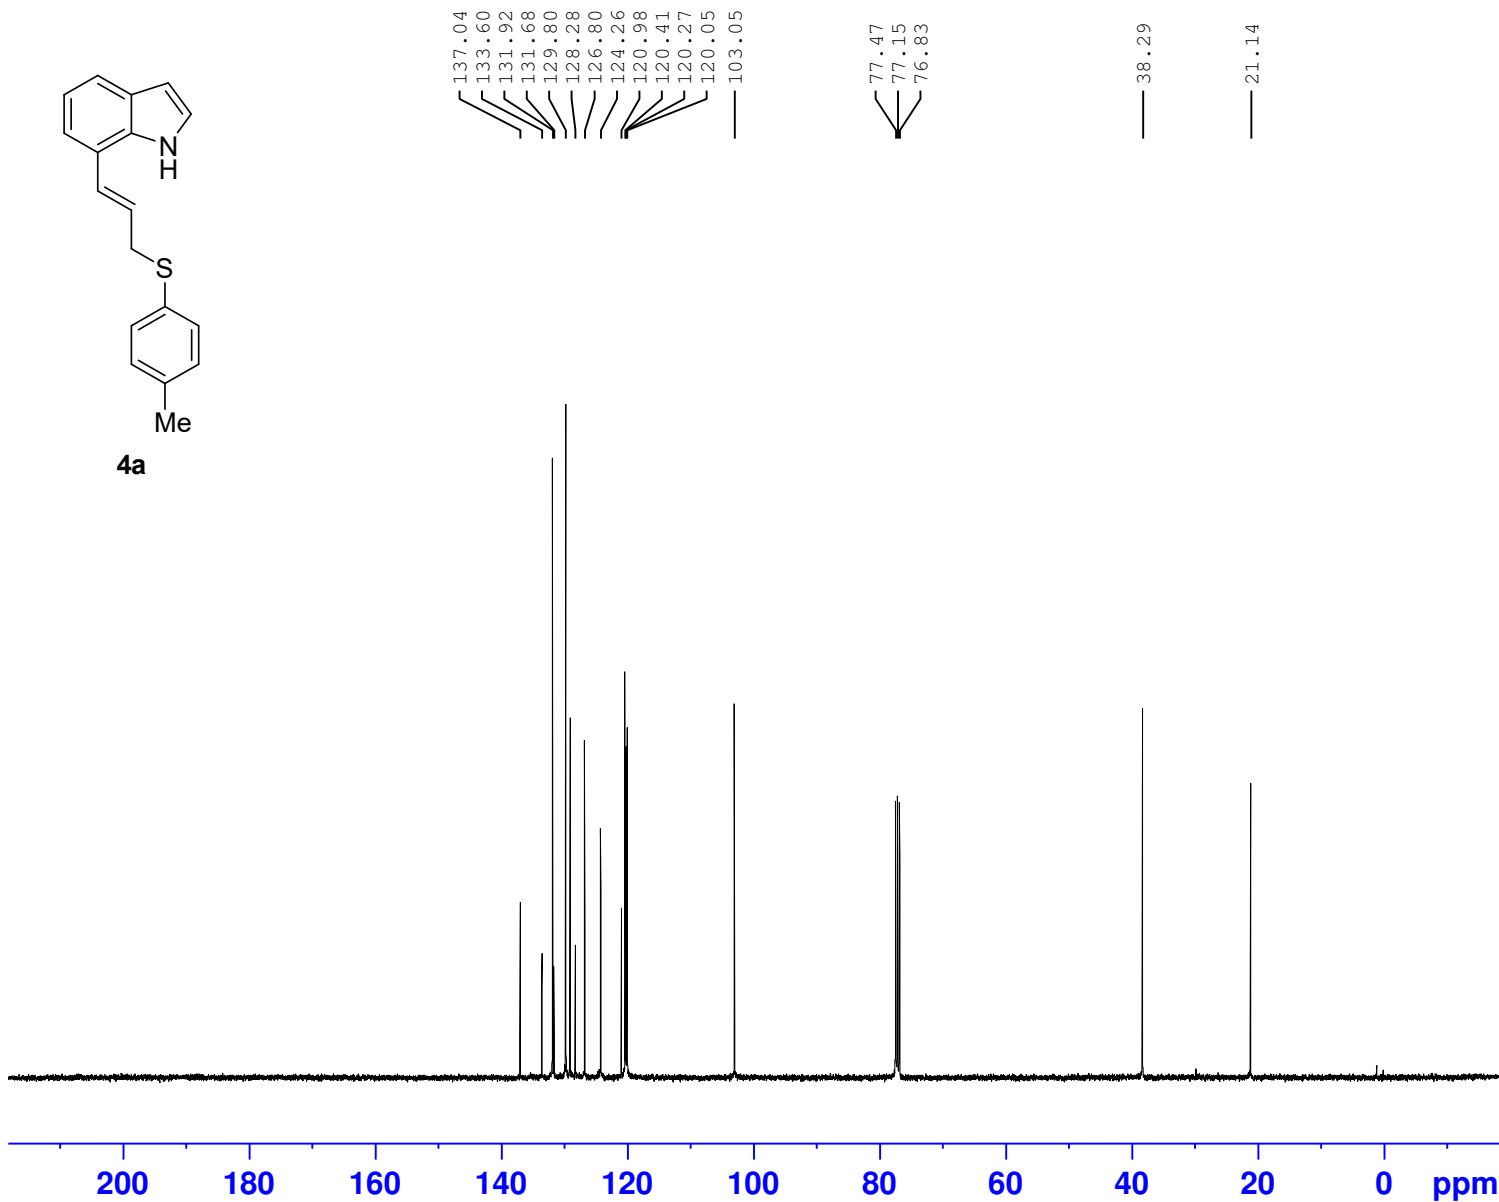

Current Data Parameters  
 NAME 2023-5-4  
 EXPNO 2  
 PROCNO 1

F2 - Acquisition Parameters  
 Date\_ 20230429  
 Time 2.32 h  
 INSTRUM Avance  
 PROBHD z116098\_0833 (  
 PULPROG zgpg30  
 TD 65536  
 SOLVENT CDC13  
 NS 500  
 DS 4  
 SWH 23809.523 Hz  
 FIDRES 0.726609 Hz  
 AQ 1.3762560 sec  
 RG 47.2408  
 DW 21.000 usec  
 DE 6.50 usec  
 TE 295.2 K  
 D1 2.00000000 sec  
 D11 0.03000000 sec  
 TD0 1  
 SFO1 100.6228298 MHz  
 NUC1 13C  
 P0 3.33 usec  
 P1 10.00 usec  
 PLW1 87.89900208 W  
 SFO2 400.1316005 MHz  
 NUC2 1H  
 CPDPRG[2] waltz65  
 PCPD2 90.00 usec  
 PLW2 20.73200035 W  
 PLW12 0.25595000 W  
 PLW13 0.12874000 W

F2 - Processing parameters  
 SI 32768  
 SF 100.6127704 MHz  
 WDW EM  
 SSB 0  
 LB 1.00 Hz  
 GB 0  
 PC 1.40

XY-3-71-H

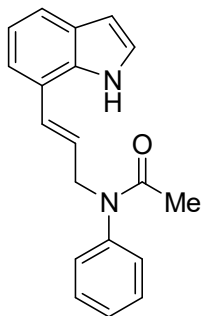

4b

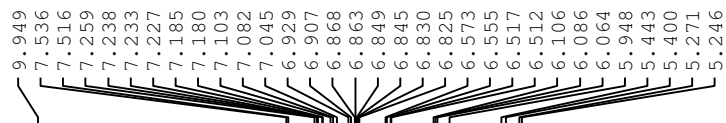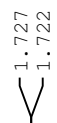

Current Data Parameters  
NAME 2023-4-27  
EXPNO 9  
PROCNO 1

F2 - Acquisition Parameters  
Date\_ 20230428  
Time 16.05 h  
INSTRUM Avance  
PROBHD z116098\_0833 (  
PULPROG zg30  
TD 65536  
SOLVENT CDC13  
NS 16  
DS 2  
SWH 8196.722 Hz  
FIDRES 0.250144 Hz  
AQ 3.9976959 sec  
RG 91.6422  
DW 61.000 usec  
DE 13.54 usec  
TE 293.9 K  
D1 1.00000000 sec  
TD0 1  
SFO1 400.1324708 MHz  
NUC1 1H  
P0 3.33 usec  
P1 10.00 usec  
PLW1 20.73200035 W

F2 - Processing parameters  
SI 65536  
SF 400.1300415 MHz  
WDW EM  
SSB 0  
LB 0.30 Hz  
GB 0  
PC 1.00

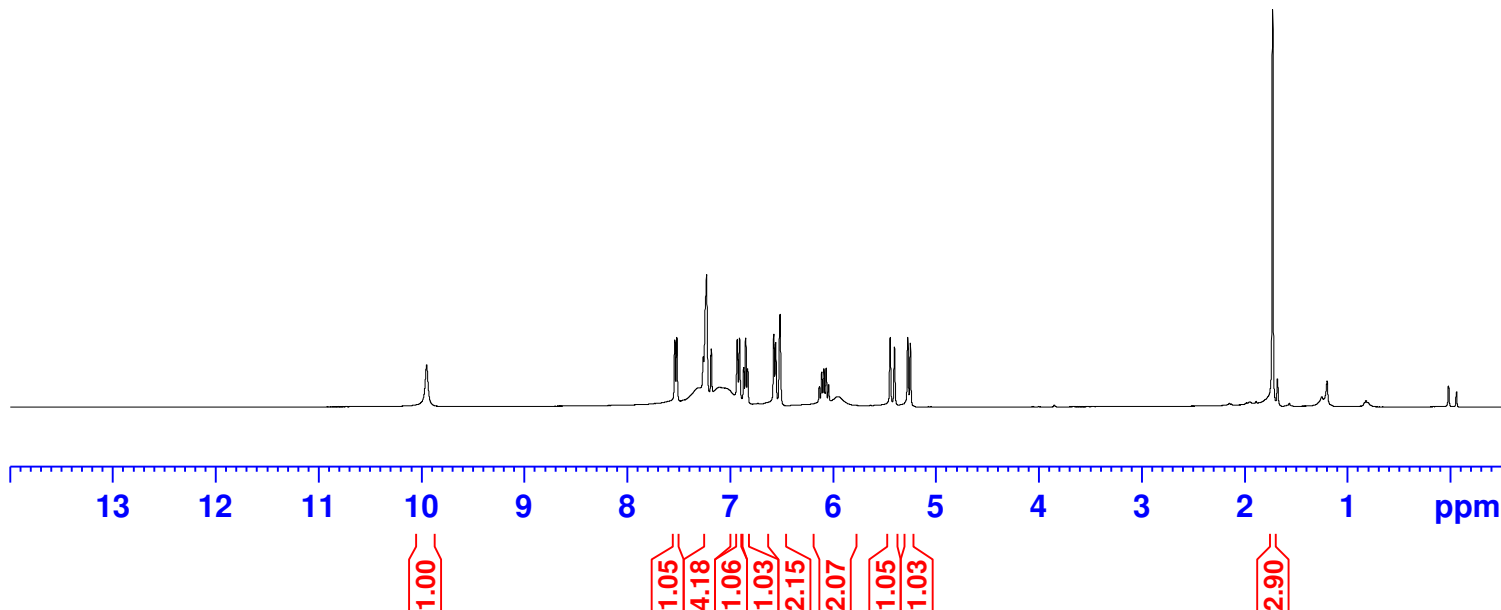

XY-3-71-C

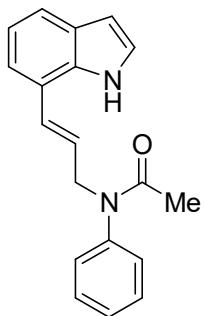

4b

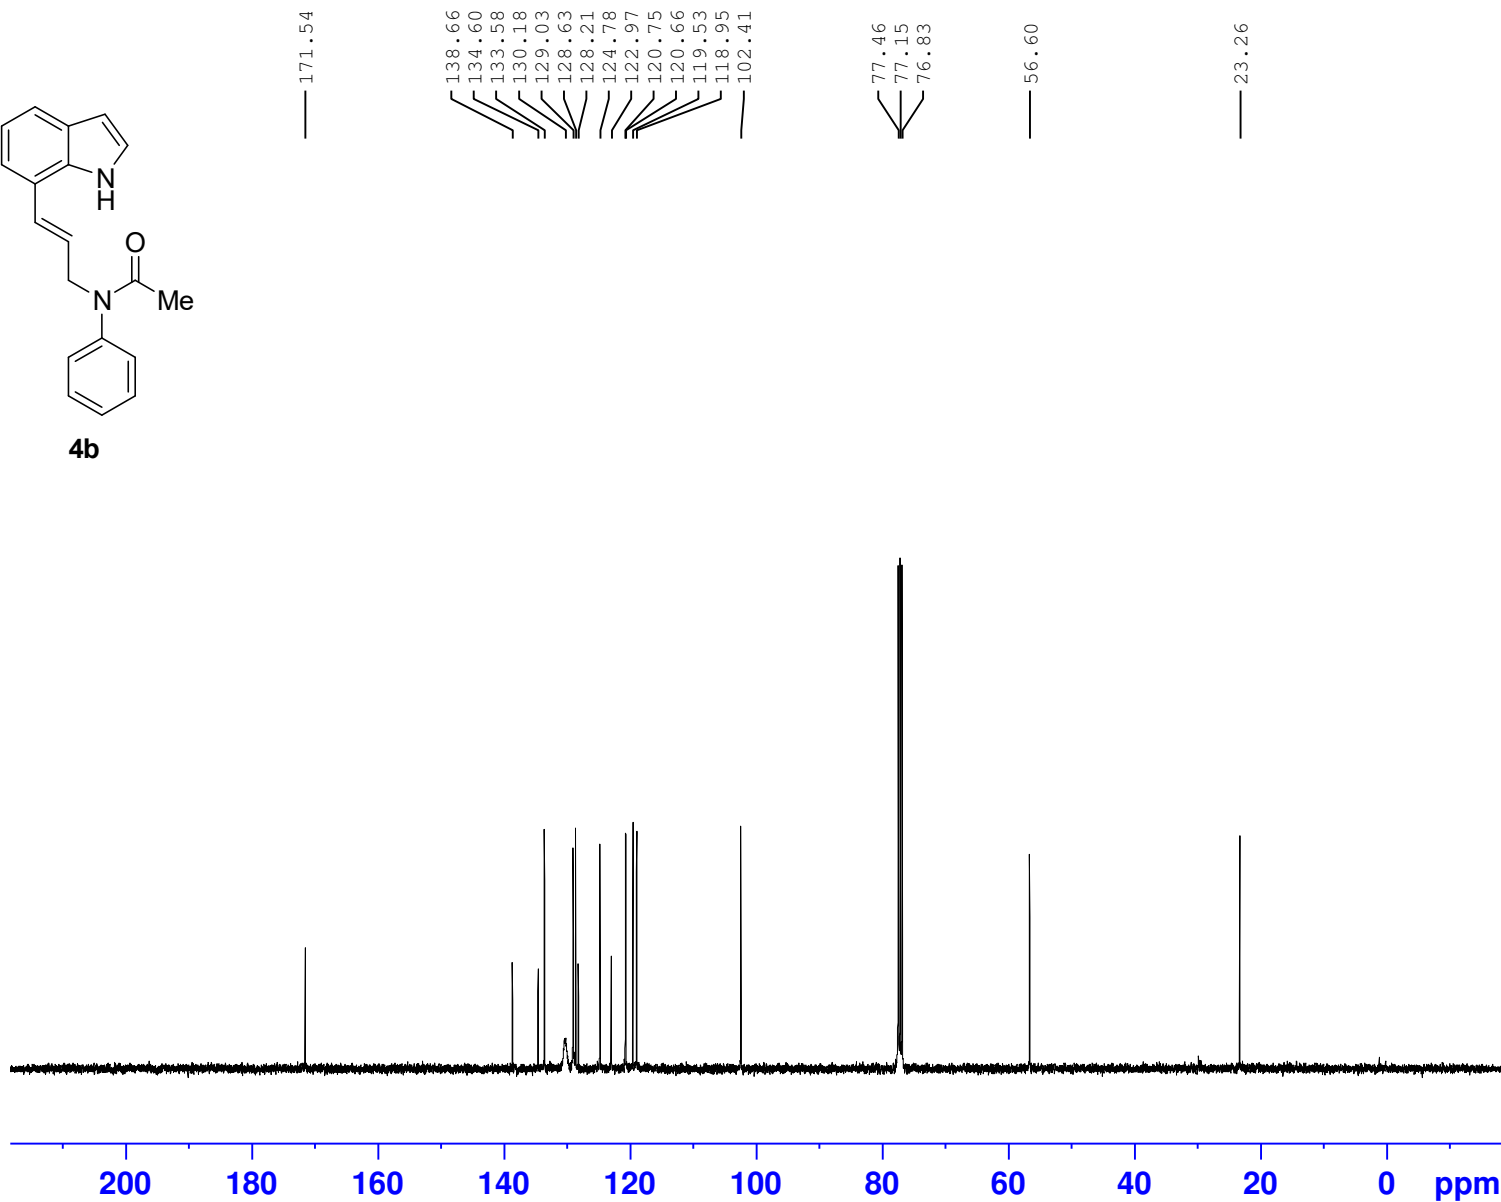

Current Data Parameters  
NAME 2023-4-27  
EXPNO 7  
PROCNO 1

F2 - Acquisition Parameters  
Date\_ 20230428  
Time 2.30 h  
INSTRUM Avance  
PROBHD z116098\_0833 (  
PULPROG zgpg30  
TD 65536  
SOLVENT CDC13  
NS 500  
DS 4  
SWH 23809.523 Hz  
FIDRES 0.726609 Hz  
AQ 1.3762560 sec  
RG 47.4244  
DW 21.000 usec  
DE 6.50 usec  
TE 295.0 K  
D1 2.00000000 sec  
D11 0.03000000 sec  
TD0 1  
SFO1 100.6228298 MHz  
NUC1 13C  
P0 3.33 usec  
P1 10.00 usec  
PLW1 87.89900208 W  
SFO2 400.1316005 MHz  
NUC2 1H  
CPDPRG[2] waltz65  
PCPD2 90.00 usec  
PLW2 20.73200035 W  
PLW12 0.25595000 W  
PLW13 0.12874000 W

F2 - Processing parameters  
SI 32768  
SF 100.6127620 MHz  
WDW EM  
SSB 0  
LB 1.00 Hz  
GB 0  
PC 1.40

XY-3-79-H

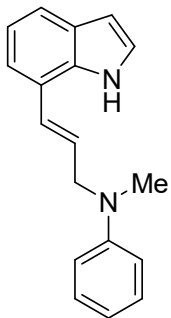

4c

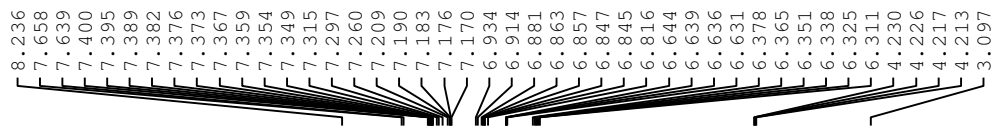

Current Data Parameters  
NAME 2023-5-10  
EXPNO 1  
PROCNO 1

F2 - Acquisition Parameters  
Date\_ 20230511  
Time 1.49 h  
INSTRUM Avance  
PROBHD z116098\_0833 (  
PULPROG zg30  
TD 65536  
SOLVENT CDCl3  
NS 16  
DS 2  
SWH 8196.722 Hz  
FIDRES 0.250144 Hz  
AQ 3.9976959 sec  
RG 43.4783  
DW 61.000 usec  
DE 13.54 usec  
TE 294.3 K  
D1 1.00000000 sec  
TD0 1  
SFO1 400.1324708 MHz  
NUC1 1H  
P0 3.33 usec  
P1 10.00 usec  
PLW1 20.73200035 W

F2 - Processing parameters  
SI 65536  
SF 400.1300098 MHz  
WDW EM  
SSB 0  
LB 0.30 Hz  
GB 0  
PC 1.00

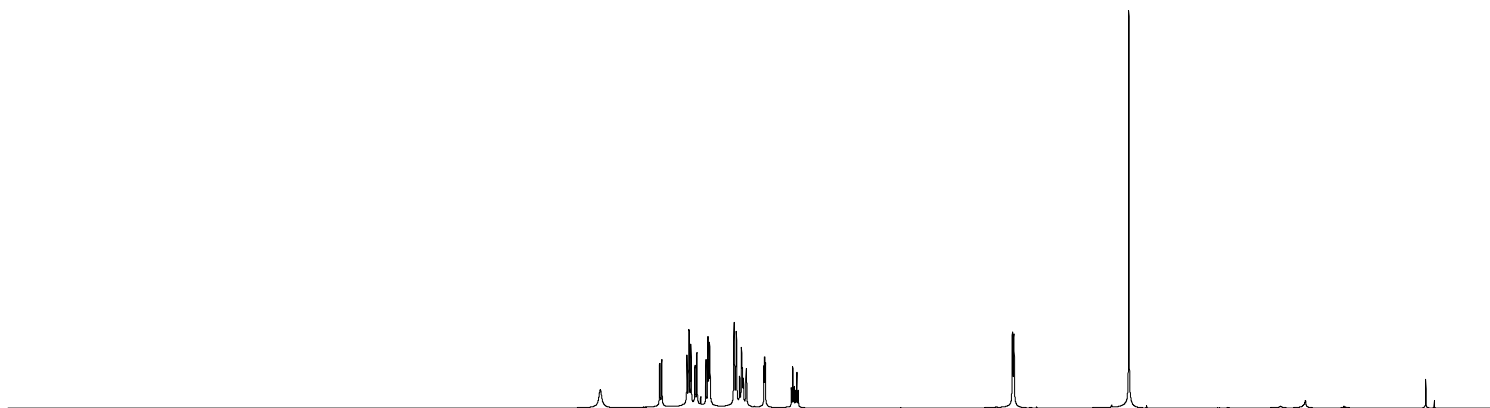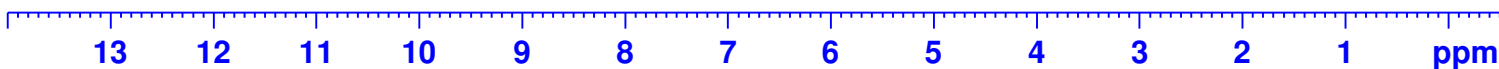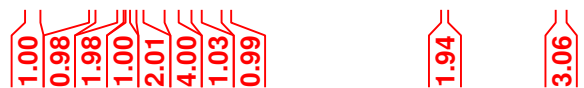

XY-3-79-C

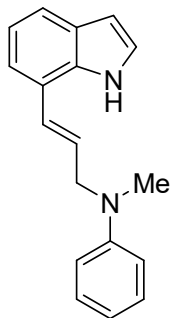

4c

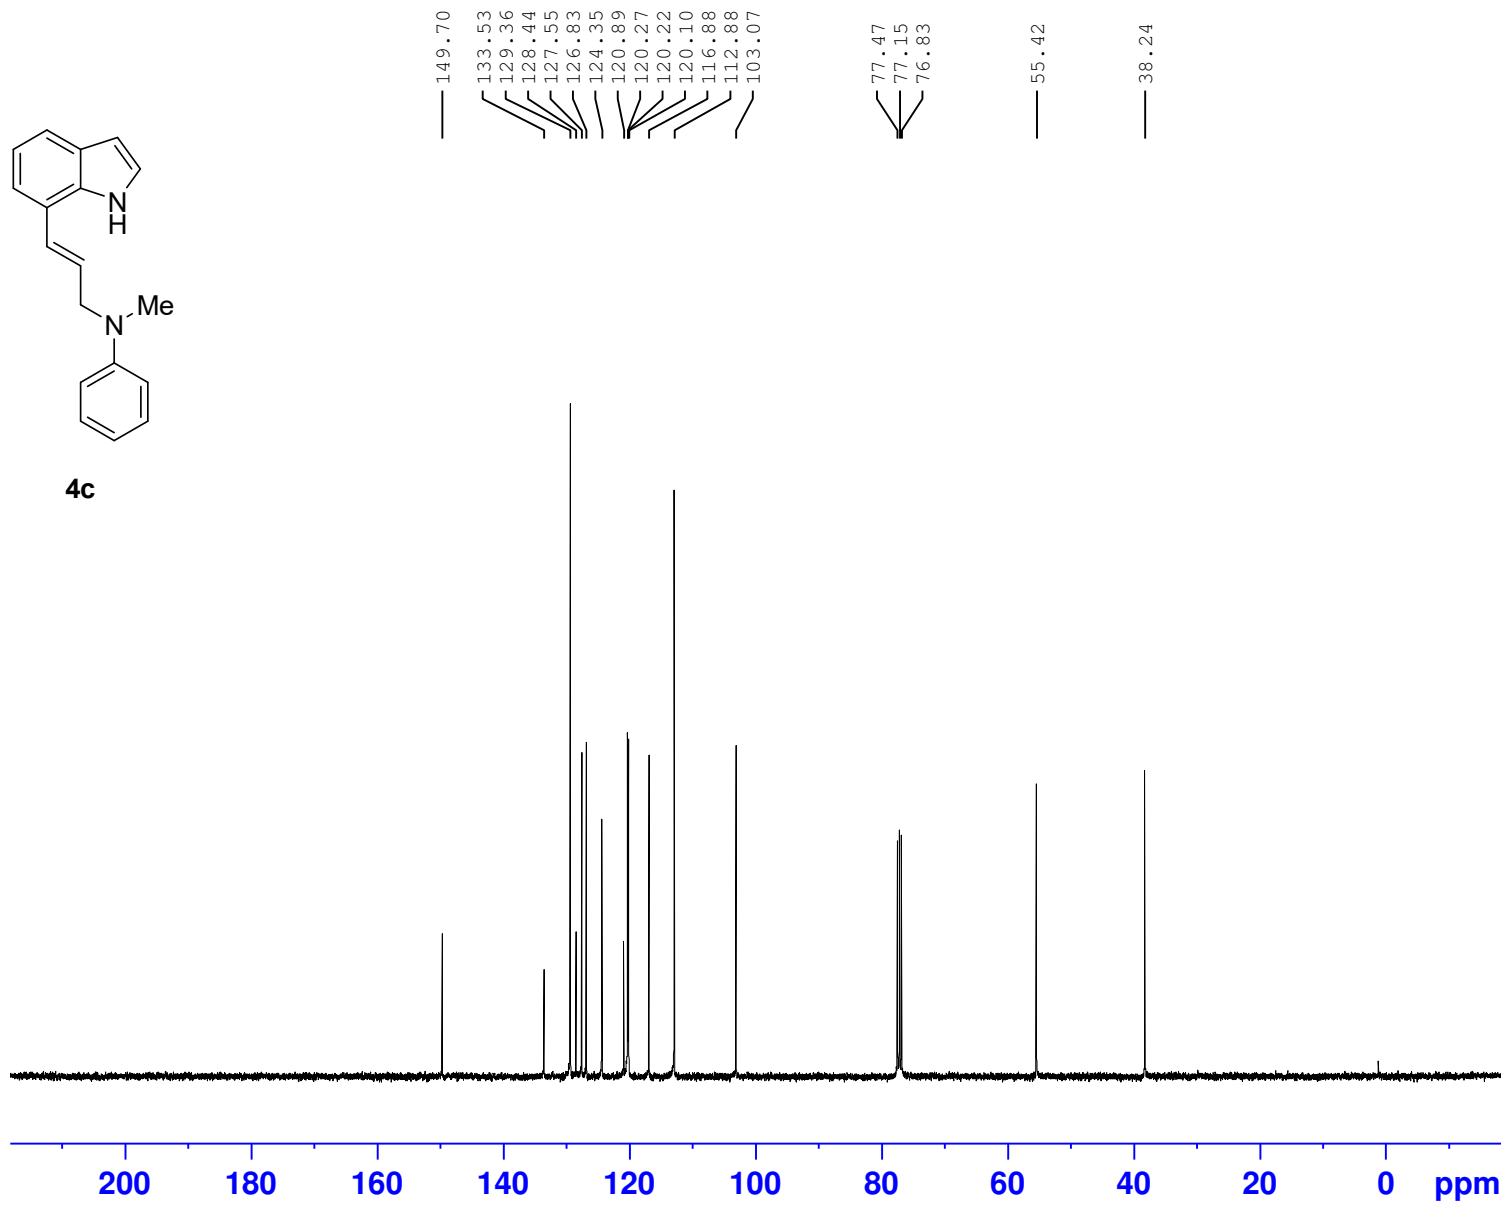

Current Data Parameters  
NAME 2023-5-10  
EXPNO 2  
PROCNO 1

F2 - Acquisition Parameters  
Date\_ 20230511  
Time 2.02 h  
INSTRUM Avance  
PROBHD z116098\_0833 (  
PULPROG zgpg30  
TD 65536  
SOLVENT CDC13  
NS 200  
DS 4  
SWH 23809.523 Hz  
FIDRES 0.726609 Hz  
AQ 1.3762560 sec  
RG 47.4244  
DW 21.000 usec  
DE 6.50 usec  
TE 294.8 K  
D1 2.00000000 sec  
D11 0.03000000 sec  
TD0 1  
SFO1 100.6228298 MHz  
NUC1 13C  
P0 3.33 usec  
P1 10.00 usec  
PLW1 87.89900208 W  
SFO2 400.1316005 MHz  
NUC2 1H  
CPDPRG[2] waltz65  
PCPD2 90.00 usec  
PLW2 20.73200035 W  
PLW12 0.25595000 W  
PLW13 0.12874000 W

F2 - Processing parameters  
SI 32768  
SF 100.6127743 MHz  
WDW EM  
SSB 0  
LB 1.00 Hz  
GB 0  
PC 1.40

XY-3-69-H

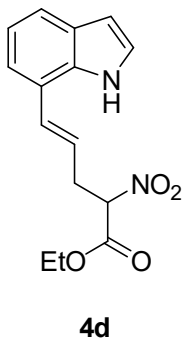

8.430  
7.597  
7.577  
7.260  
7.242  
7.235  
7.228  
7.173  
7.155  
7.117  
7.098  
7.079  
6.850  
6.810  
6.589  
6.584  
6.581  
6.576  
6.198  
6.180  
6.161  
6.140  
6.122  
5.305  
5.291  
5.284  
5.269  
4.349  
4.347  
4.331  
4.330  
4.313  
4.295  
3.232  
3.214  
3.195  
3.189  
3.185  
3.173  
3.156  
3.153  
3.134  
1.332  
1.315  
1.297



Current Data Parameters  
NAME 2023-4-27  
EXPNO 4  
PROCNO 1

F2 - Acquisition Parameters  
Date\_ 20230428  
Time 0.53 h  
INSTRUM Avance  
PROBHD z116098\_0833 (  
PULPROG zg30  
TD 65536  
SOLVENT CDCl3  
NS 16  
DS 2  
SWH 8196.722 Hz  
FIDRES 0.250144 Hz  
AQ 3.9976959 sec  
RG 98.3478  
DW 61.000 usec  
DE 13.54 usec  
TE 294.5 K  
D1 1.00000000 sec  
TD0 1  
SFO1 400.1324708 MHz  
NUC1 1H  
P0 3.33 usec  
P1 10.00 usec  
PLW1 20.73200035 W

F2 - Processing parameters  
SI 65536  
SF 400.1300098 MHz  
WDW EM  
SSB 0  
LB 0.30 Hz  
GB 0  
PC 1.00

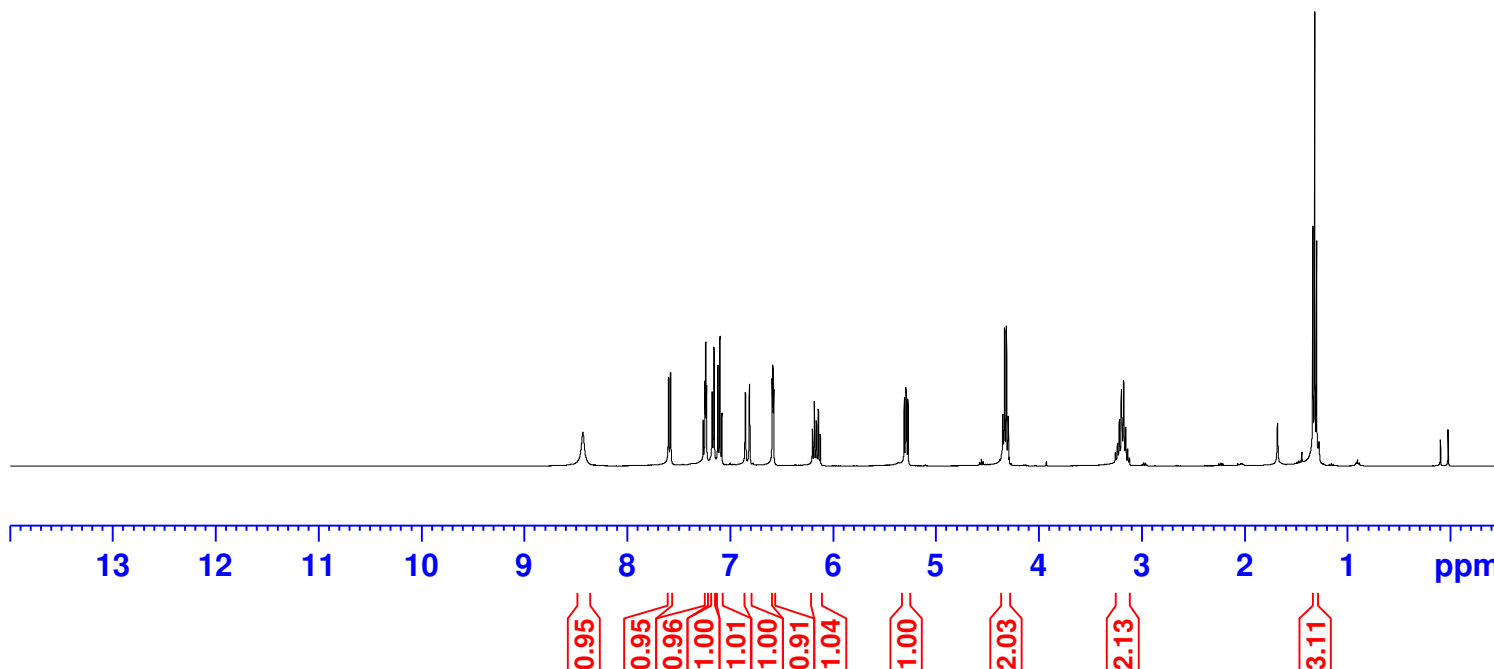

XY-3-69-C

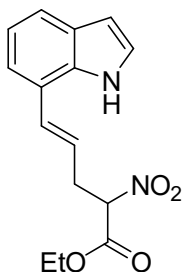

4d

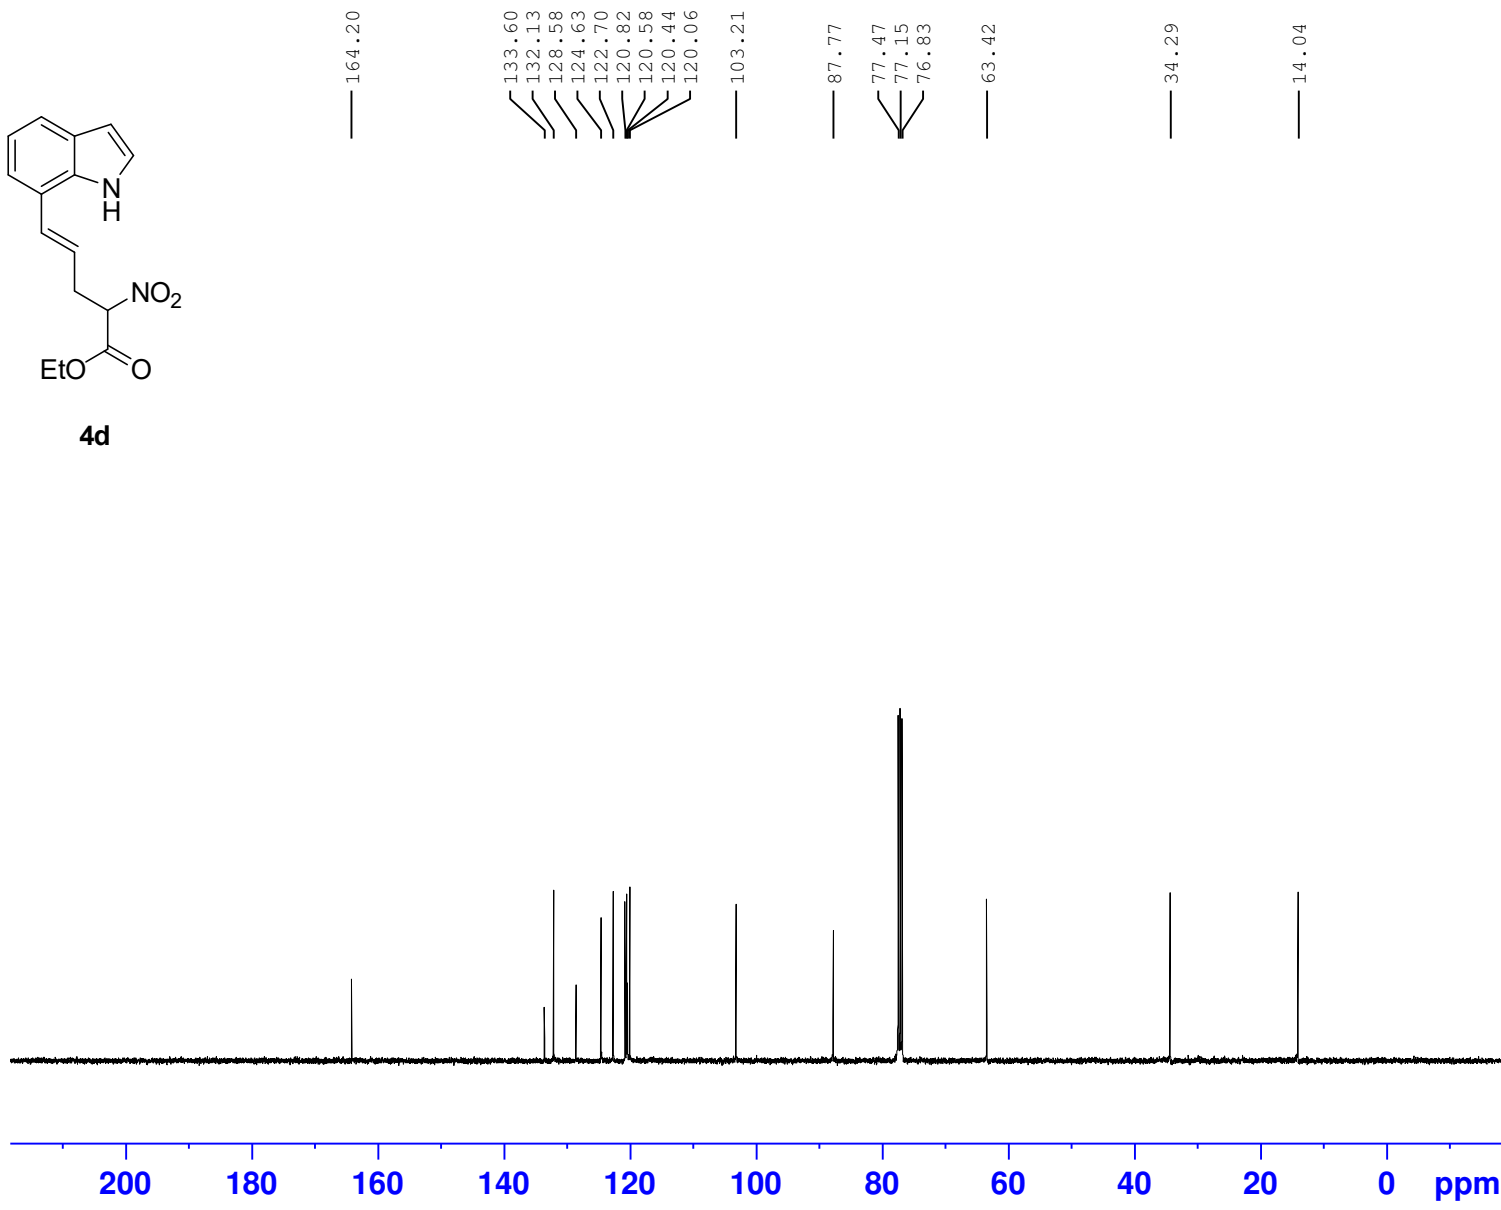

164.20  
 133.60  
 132.13  
 128.58  
 124.63  
 122.70  
 120.82  
 120.58  
 120.44  
 120.06  
 103.21  
 87.77  
 77.47  
 77.15  
 76.83  
 63.42  
 34.29  
 14.04



Current Data Parameters  
 NAME 2023-4-27  
 EXPNO 5  
 PROCNO 1

F2 - Acquisition Parameters  
 Date\_ 20230428  
 Time 1.23 h  
 INSTRUM Avance  
 PROBHD z116098\_0833 (  
 PULPROG zgpg30  
 TD 65536  
 SOLVENT CDC13  
 NS 500  
 DS 4  
 SWH 23809.523 Hz  
 FIDRES 0.726609 Hz  
 AQ 1.3762560 sec  
 RG 47.4244  
 DW 21.000 usec  
 DE 6.50 usec  
 TE 294.8 K  
 D1 2.00000000 sec  
 D11 0.03000000 sec  
 TD0 1  
 SFO1 100.6228298 MHz  
 NUC1 13C  
 P0 3.33 usec  
 P1 10.00 usec  
 PLW1 87.89900208 W  
 SFO2 400.1316005 MHz  
 NUC2 1H  
 CPDPRG[2] waltz65  
 PCPD2 90.00 usec  
 PLW2 20.73200035 W  
 PLW12 0.25595000 W  
 PLW13 0.12874000 W

F2 - Processing parameters  
 SI 32768  
 SF 100.6127611 MHz  
 WDW EM  
 SSB 0  
 LB 1.00 Hz  
 GB 0  
 PC 1.40



XY-3-70-H

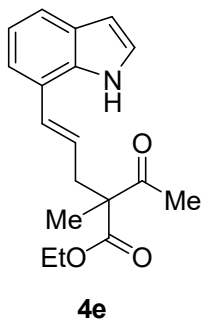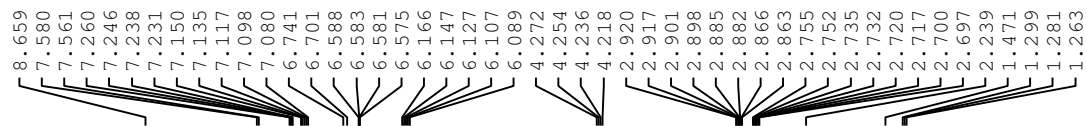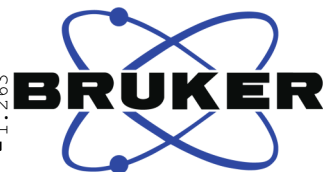

Current Data Parameters  
NAME 2023-4-27  
EXPNO 8  
PROCNO 1

F2 - Acquisition Parameters  
Date\_ 20230428  
Time 15.59 h  
INSTRUM Avance  
PROBHD z116098\_0833 (  
PULPROG zg30  
TD 65536  
SOLVENT CDC13  
NS 16  
DS 2  
SWH 8196.722 Hz  
FIDRES 0.250144 Hz  
AQ 3.9976959 sec  
RG 41.6667  
DW 61.000 usec  
DE 13.54 usec  
TE 293.7 K  
D1 1.00000000 sec  
TD0 1  
SFO1 400.1324708 MHz  
NUC1 1H  
P0 3.33 usec  
P1 10.00 usec  
PLW1 20.73200035 W

F2 - Processing parameters  
SI 65536  
SF 400.1300097 MHz  
WDW EM  
SSB 0  
LB 0.30 Hz  
GB 0  
PC 1.00

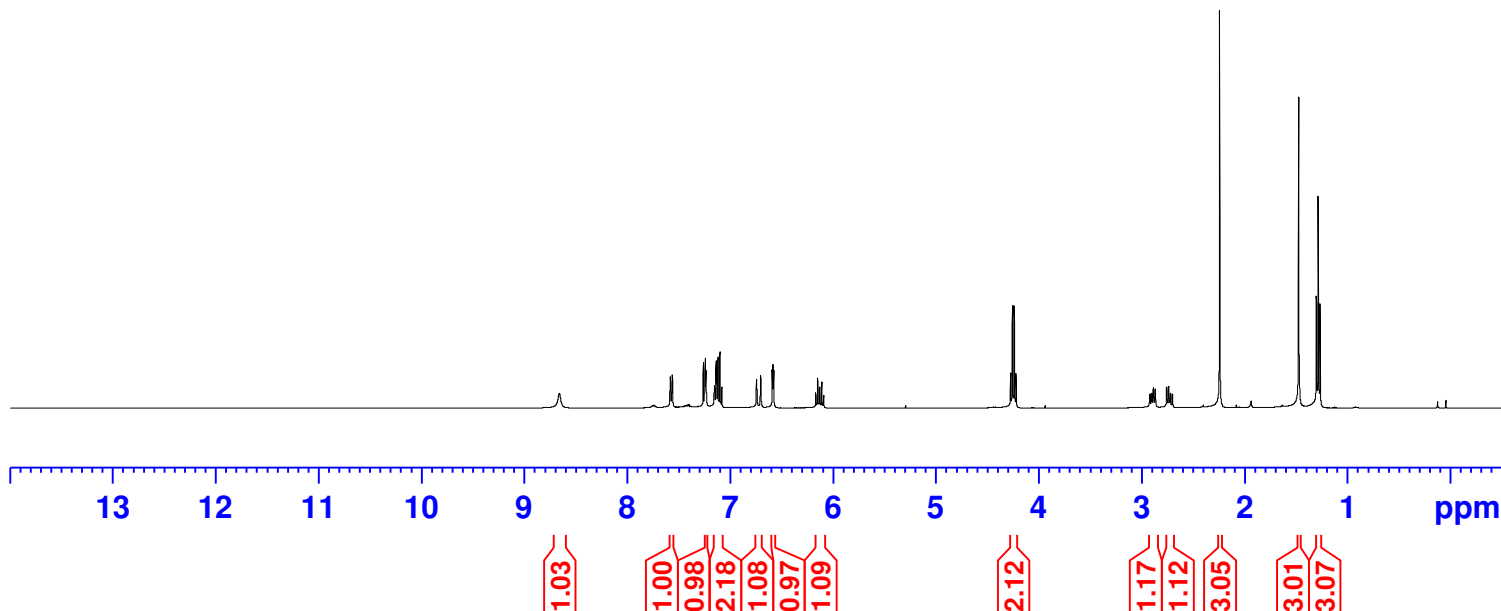

XY-3-70-C



Current Data Parameters  
 NAME 2023-4-27  
 EXPNO 6  
 PROCNO 1

F2 - Acquisition Parameters  
 Date\_ 20230428  
 Time 1.57 h  
 INSTRUM Avance  
 PROBHD z116098\_0833 (  
 PULPROG zgpg30  
 TD 65536  
 SOLVENT CDC13  
 NS 500  
 DS 4  
 SWH 23809.523 Hz  
 FIDRES 0.726609 Hz  
 AQ 1.3762560 sec  
 RG 46.0295  
 DW 21.000 usec  
 DE 6.50 usec  
 TE 294.8 K  
 D1 2.00000000 sec  
 D11 0.03000000 sec  
 TD0 1  
 SFO1 100.6228298 MHz  
 NUC1 13C  
 P0 3.33 usec  
 P1 10.00 usec  
 PLW1 87.89900208 W  
 SFO2 400.1316005 MHz  
 NUC2 1H  
 CPDPRG[2] waltz65  
 PCPD2 90.00 usec  
 PLW2 20.73200035 W  
 PLW12 0.25595000 W  
 PLW13 0.12874000 W

F2 - Processing parameters  
 SI 32768  
 SF 100.6127675 MHz  
 WDW EM  
 SSB 0  
 LB 1.00 Hz  
 GB 0  
 PC 1.40

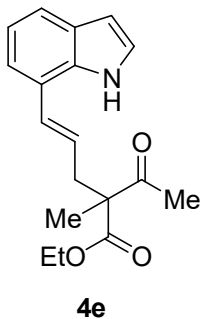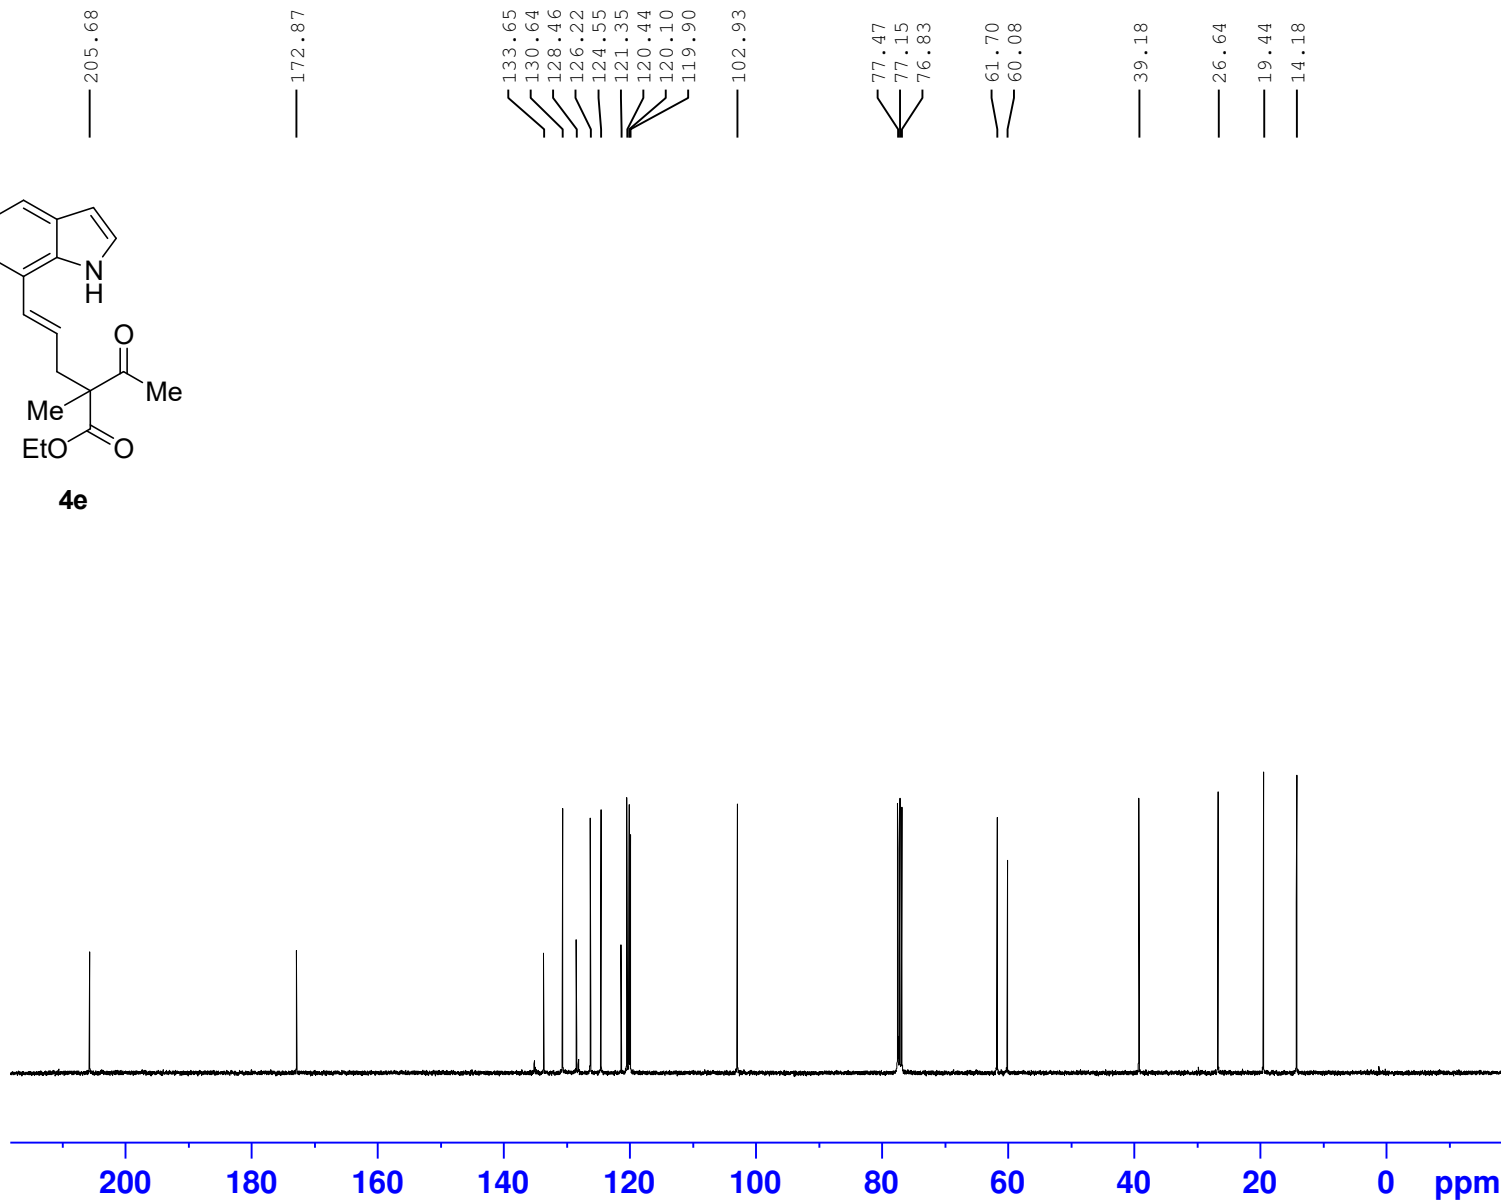

205.68  
 172.87  
 133.65  
 130.64  
 128.46  
 126.22  
 124.55  
 121.35  
 120.44  
 120.10  
 119.90  
 102.93  
 77.47  
 77.15  
 76.83  
 61.70  
 60.08  
 39.18  
 26.64  
 19.44  
 14.18

XY-4-8-H

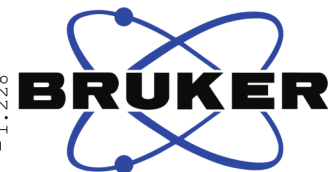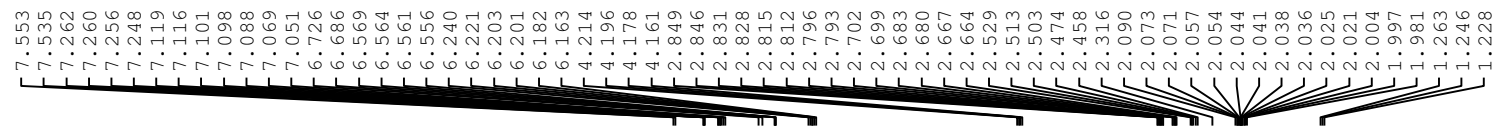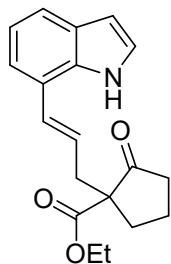

4f

Current Data Parameters  
NAME 2023-6-10  
EXPNO 1  
PROCNO 1

F2 - Acquisition Parameters  
Date\_ 20230610  
Time 18.51 h  
INSTRUM Avance  
PROBHD z116098\_0833 (  
PULPROG zg30  
TD 65536  
SOLVENT CDC13  
NS 16  
DS 2  
SWH 8196.722 Hz  
FIDRES 0.250144 Hz  
AQ 3.9976959 sec  
RG 101  
DW 61.000 usec  
DE 13.54 usec  
TE 294.9 K  
D1 1.00000000 sec  
TD0 1  
SFO1 400.1324708 MHz  
NUC1 1H  
P0 3.33 usec  
P1 10.00 usec  
PLW1 20.73200035 W

F2 - Processing parameters  
SI 65536  
SF 400.1300097 MHz  
WDW EM  
SSB 0  
LB 0.30 Hz  
GB 0  
PC 1.00

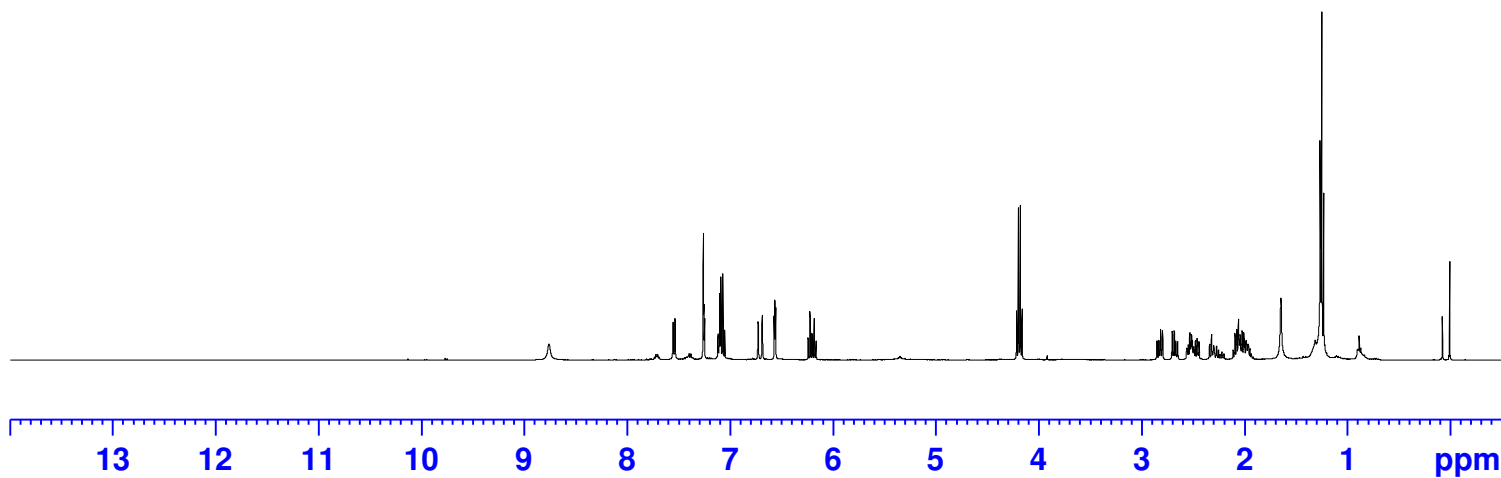

XY-4-8-C

— 215.17  
 — 171.43  
 133.77  
 130.77  
 128.51  
 126.69  
 124.59  
 121.46  
 120.55  
 120.15  
 119.92  
 — 102.96  
 77.46  
 77.15  
 76.83  
 61.79  
 60.70  
 38.41  
 37.58  
 33.39  
 19.75  
 14.26

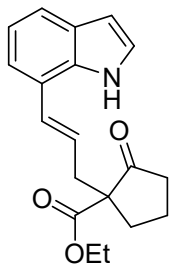

4f

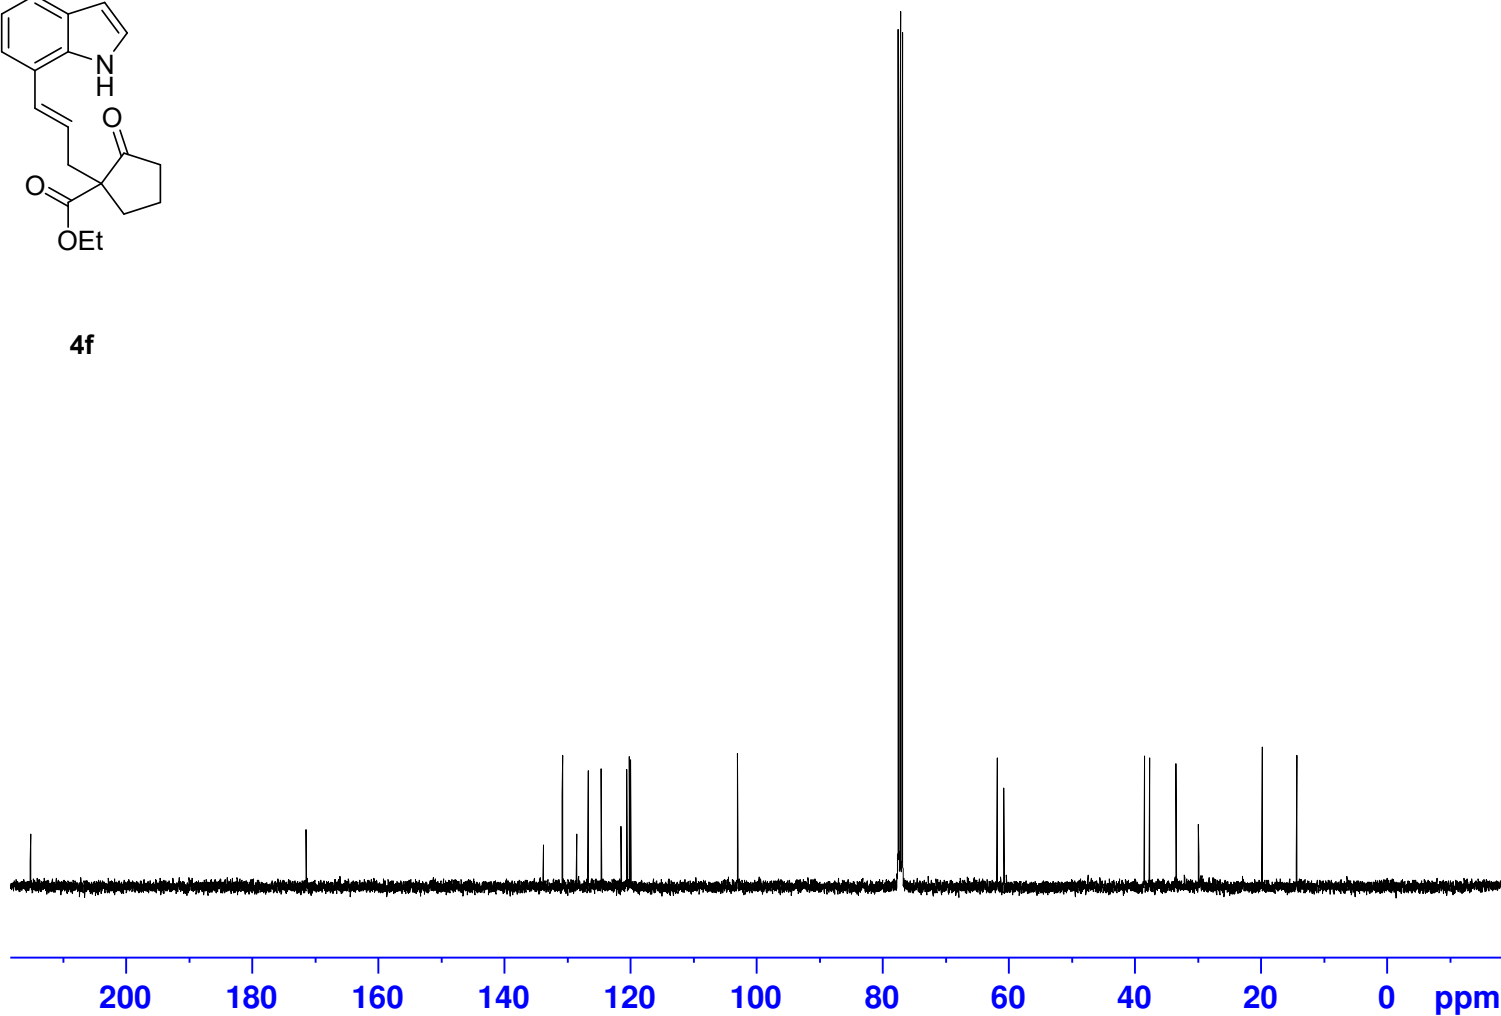

Current Data Parameters  
 NAME 2023-6-13  
 EXPNO 1  
 PROCNO 1

F2 - Acquisition Parameters  
 Date\_ 20230614  
 Time 7.14 h  
 INSTRUM Avance  
 PROBHD z116098\_0833 (  
 PULPROG zgpg30  
 TD 65536  
 SOLVENT CDCl3  
 NS 500  
 DS 4  
 SWH 23809.523 Hz  
 FIDRES 0.726609 Hz  
 AQ 1.3762560 sec  
 RG 46.0295  
 DW 21.000 usec  
 DE 6.50 usec  
 TE 294.4 K  
 D1 2.00000000 sec  
 D11 0.03000000 sec  
 TD0 1  
 SFO1 100.6228298 MHz  
 NUC1 13C  
 P0 3.33 usec  
 P1 10.00 usec  
 PLW1 87.89900208 W  
 SFO2 400.1316005 MHz  
 NUC2 1H  
 CPDPRG[2] waltz65  
 PCPD2 90.00 usec  
 PLW2 20.73200035 W  
 PLW12 0.25595000 W  
 PLW13 0.12874000 W

F2 - Processing parameters  
 SI 32768  
 SF 100.6127584 MHz  
 WDW EM  
 SSB 0  
 LB 1.00 Hz  
 GB 0  
 PC 1.40

XY-4-22-H

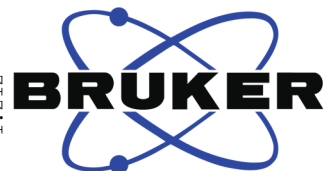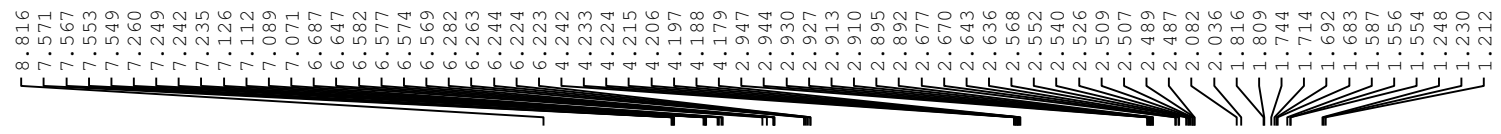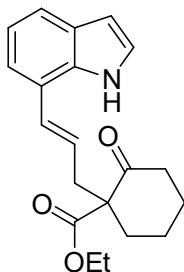

4g

Current Data Parameters  
 NAME 2023-6-16-1  
 EXPNO 3  
 PROCNO 1

F2 - Acquisition Parameters  
 Date\_ 20230617  
 Time 4.21 h  
 INSTRUM Avance  
 PROBHD z116098\_0833 (  
 PULPROG zg30  
 TD 65536  
 SOLVENT CDC13  
 NS 16  
 DS 2  
 SWH 8196.722 Hz  
 FIDRES 0.250144 Hz  
 AQ 3.9976959 sec  
 RG 32  
 DW 61.000 usec  
 DE 13.54 usec  
 TE 294.4 K  
 D1 1.00000000 sec  
 TD0 1  
 SFO1 400.1324708 MHz  
 NUC1 1H  
 P0 3.33 usec  
 P1 10.00 usec  
 PLW1 20.73200035 W

F2 - Processing parameters  
 SI 65536  
 SF 400.1300094 MHz  
 WDW EM  
 SSB 0  
 LB 0.30 Hz  
 GB 0  
 PC 1.00

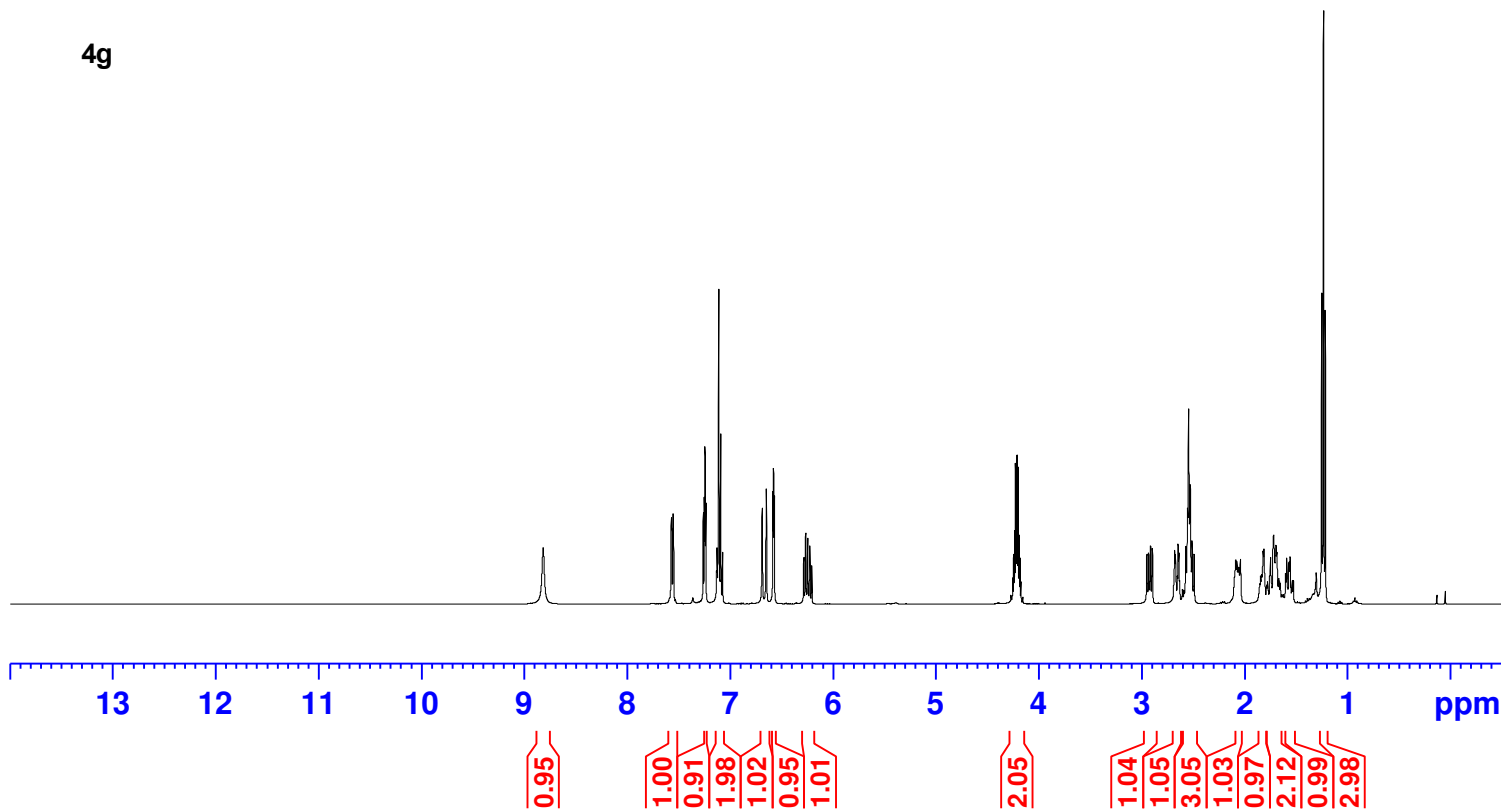

XY-4-22-C

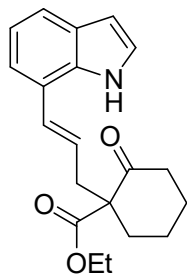

4g

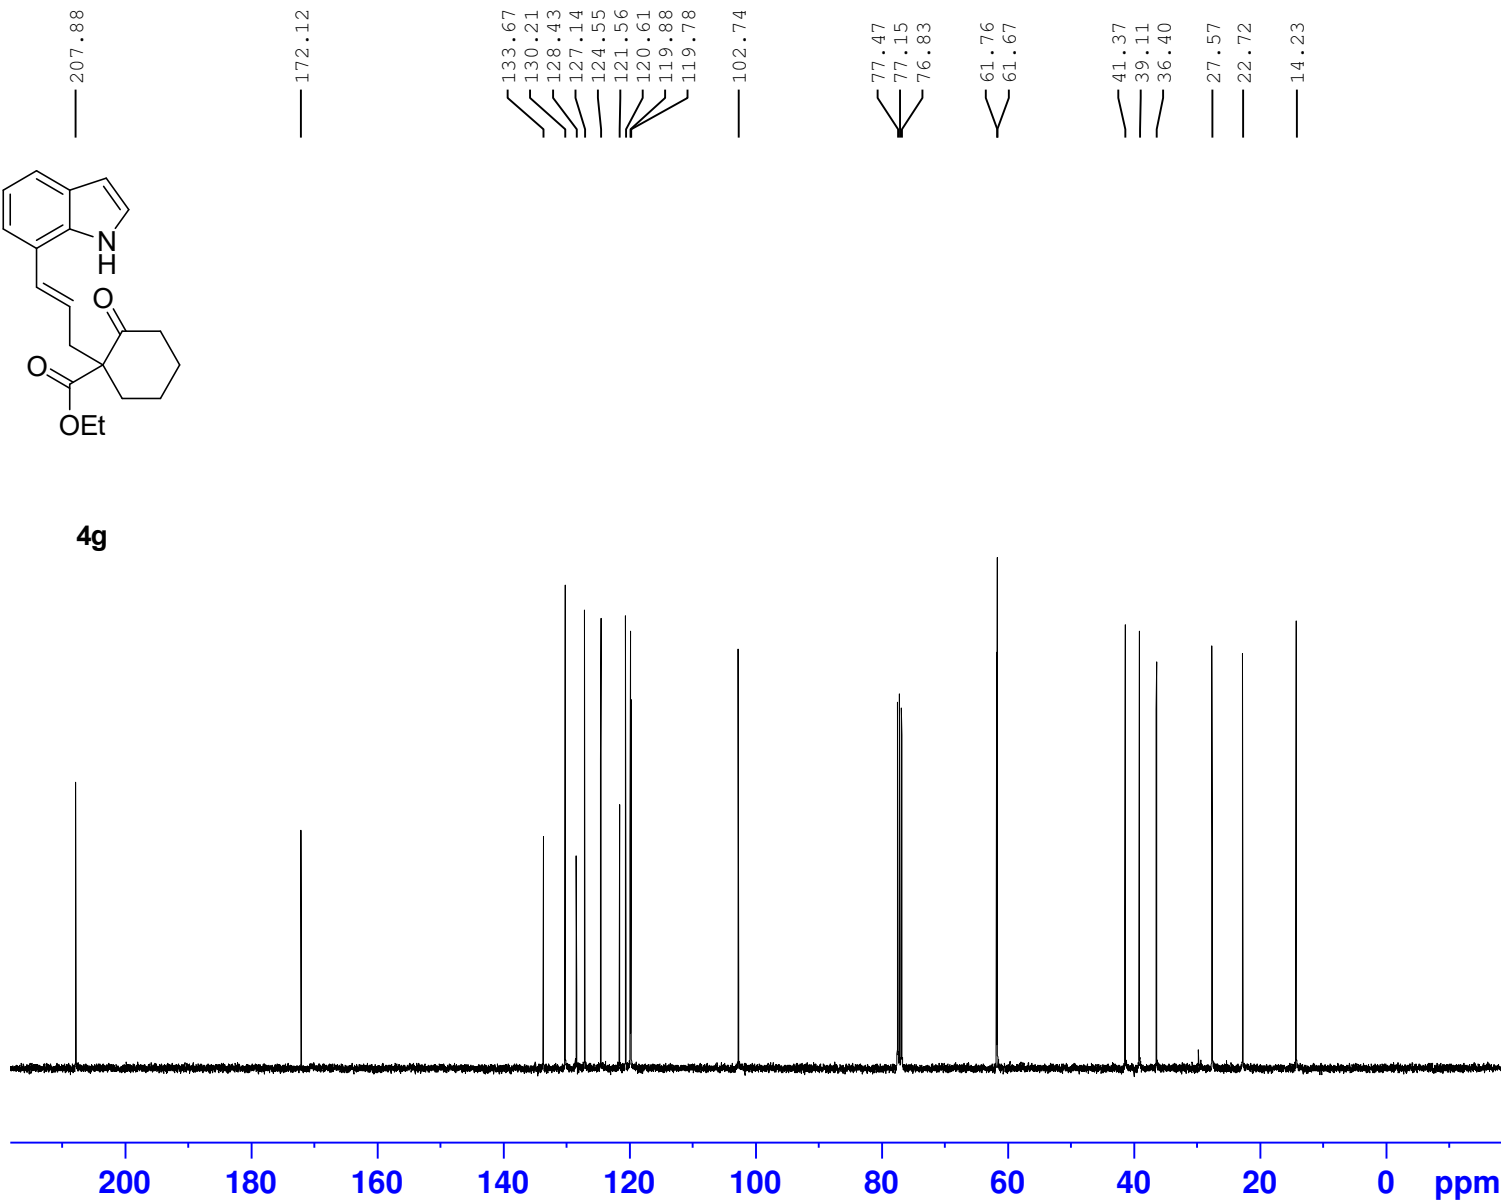

Current Data Parameters  
 NAME 2023-6-16-1  
 EXPNO 4  
 PROCNO 1

F2 - Acquisition Parameters  
 Date\_ 20230617  
 Time 4.33 h  
 INSTRUM Avance  
 PROBHD z116098\_0833 (  
 PULPROG zgpg30  
 TD 65536  
 SOLVENT CDC13  
 NS 200  
 DS 4  
 SWH 23809.523 Hz  
 FIDRES 0.726609 Hz  
 AQ 1.3762560 sec  
 RG 47.4244  
 DW 21.000 usec  
 DE 6.50 usec  
 TE 294.8 K  
 D1 2.00000000 sec  
 D11 0.03000000 sec  
 TD0 1  
 SFO1 100.6228298 MHz  
 NUC1 13C  
 P0 3.33 usec  
 P1 10.00 usec  
 PLW1 87.89900208 W  
 SFO2 400.1316005 MHz  
 NUC2 1H  
 CPDPRG[2] waltz65  
 PCPD2 90.00 usec  
 PLW2 20.73200035 W  
 PLW12 0.25595000 W  
 PLW13 0.12874000 W

F2 - Processing parameters  
 SI 32768  
 SF 100.6127705 MHz  
 WDW EM  
 SSB 0  
 LB 1.00 Hz  
 GB 0  
 PC 1.40

XY-4-15-H

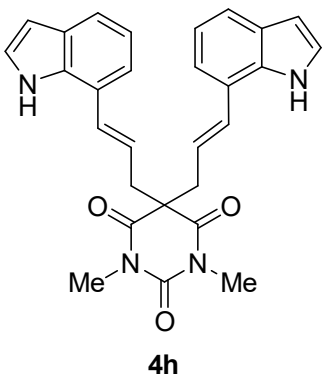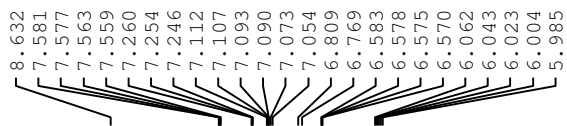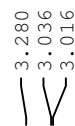

Current Data Parameters  
NAME 2023-6-12  
EXPNO 2  
PROCNO 1

F2 - Acquisition Parameters  
Date\_ 20230613  
Time 2.49 h  
INSTRUM Avance  
PROBHD z116098\_0833 (  
PULPROG zg30  
TD 65536  
SOLVENT CDC13  
NS 16  
DS 2  
SWH 8196.722 Hz  
FIDRES 0.250144 Hz  
AQ 3.9976959 sec  
RG 101  
DW 61.000 usec  
DE 13.54 usec  
TE 294.3 K  
D1 1.00000000 sec  
TD0 1  
SFO1 400.1324708 MHz  
NUC1 1H  
P0 3.33 usec  
P1 10.00 usec  
PLW1 20.73200035 W

F2 - Processing parameters  
SI 65536  
SF 400.1300098 MHz  
WDW EM  
SSB 0  
LB 0.30 Hz  
GB 0  
PC 1.00

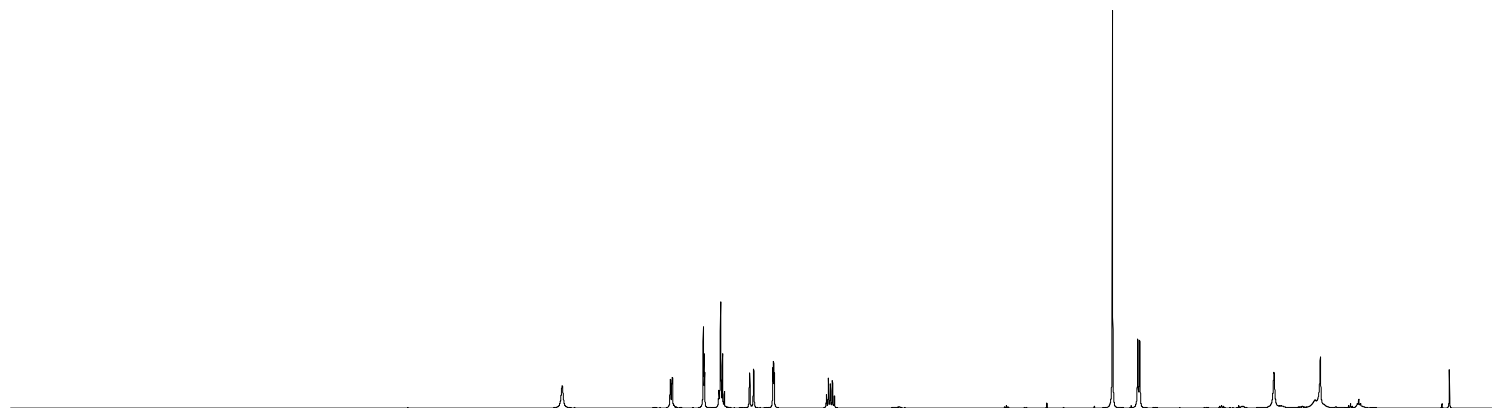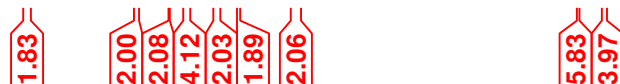

XY-4-15-C

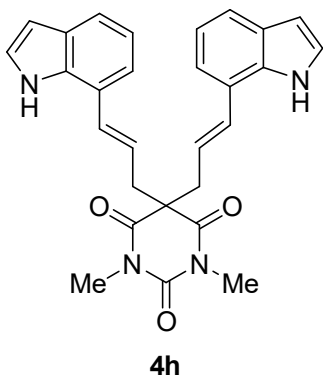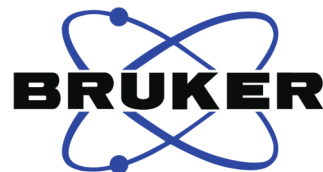

Current Data Parameters  
NAME 2023-6-12  
EXPNO 3  
PROCNO 1

F2 - Acquisition Parameters  
Date\_ 20230613  
Time 3.19 h  
INSTRUM Avance  
PROBHD z116098\_0833 (  
PULPROG zgpg30  
TD 65536  
SOLVENT CDC13  
NS 500  
DS 4  
SWH 23809.523 Hz  
FIDRES 0.726609 Hz  
AQ 1.3762560 sec  
RG 47.4244  
DW 21.000 usec  
DE 6.50 usec  
TE 294.4 K  
D1 2.00000000 sec  
D11 0.03000000 sec  
TD0 1  
SFO1 100.6228298 MHz  
NUC1 13C  
P0 3.33 usec  
P1 10.00 usec  
PLW1 87.89900208 W  
SFO2 400.1316005 MHz  
NUC2 1H  
CPDPRG[2] waltz65  
PCPD2 90.00 usec  
PLW2 20.73200035 W  
PLW12 0.25595000 W  
PLW13 0.12874000 W

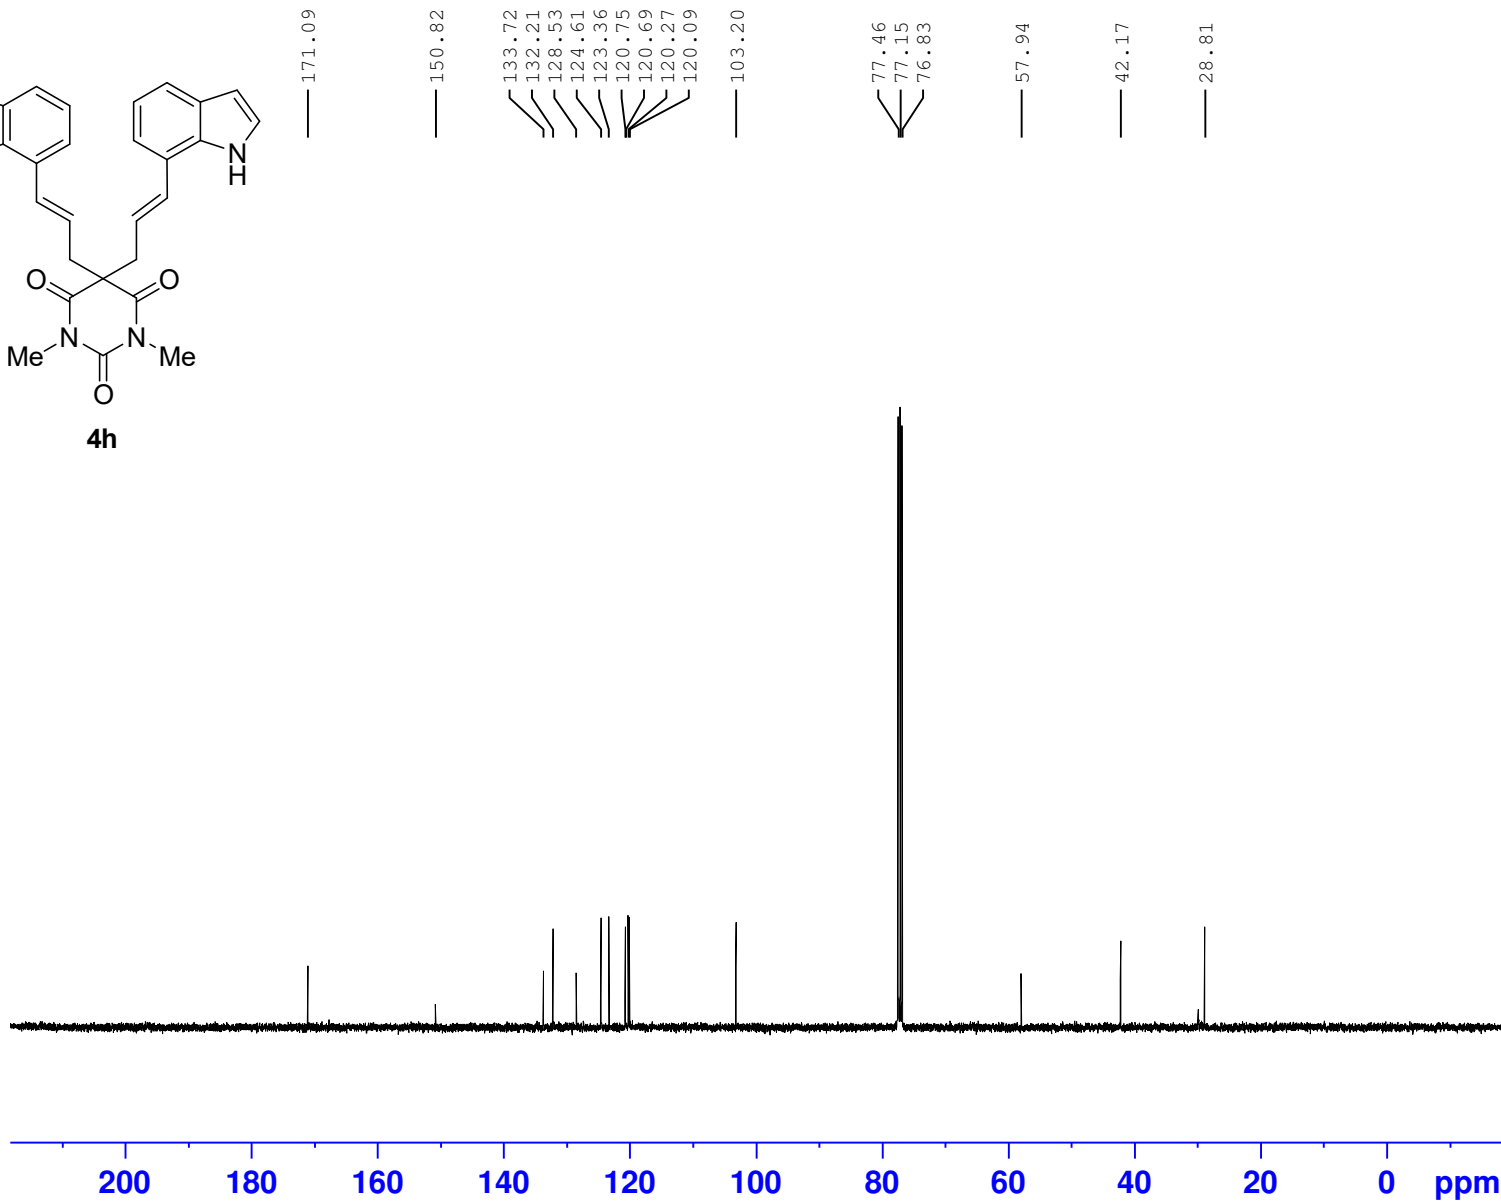

F2 - Processing parameters  
SI 32768  
SF 100.6127584 MHz  
WDW EM  
SSB 0  
LB 1.00 Hz  
GB 0  
PC 1.40



XY-4-20-H

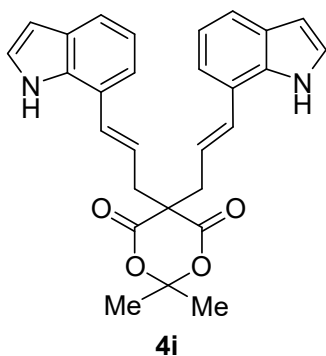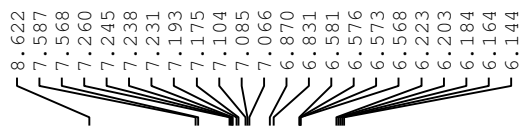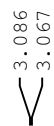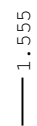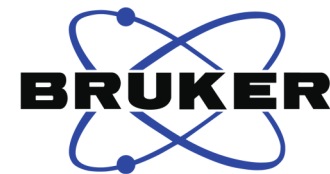

Current Data Parameters  
NAME 2023-6-14  
EXPNO 1  
PROCNO 1

F2 - Acquisition Parameters  
Date\_ 20230615  
Time 6.07 h  
INSTRUM Avance  
PROBHD z116098\_0833 (  
PULPROG zg30  
TD 65536  
SOLVENT CDC13  
NS 16  
DS 2  
SWH 8196.722 Hz  
FIDRES 0.250144 Hz  
AQ 3.9976959 sec  
RG 101  
DW 61.000 usec  
DE 13.54 usec  
TE 294.2 K  
D1 1.00000000 sec  
TD0 1  
SFO1 400.1324708 MHz  
NUC1 1H  
P0 3.33 usec  
P1 10.00 usec  
PLW1 20.73200035 W

F2 - Processing parameters  
SI 65536  
SF 400.1300101 MHz  
WDW EM  
SSB 0  
LB 0.30 Hz  
GB 0  
PC 1.00

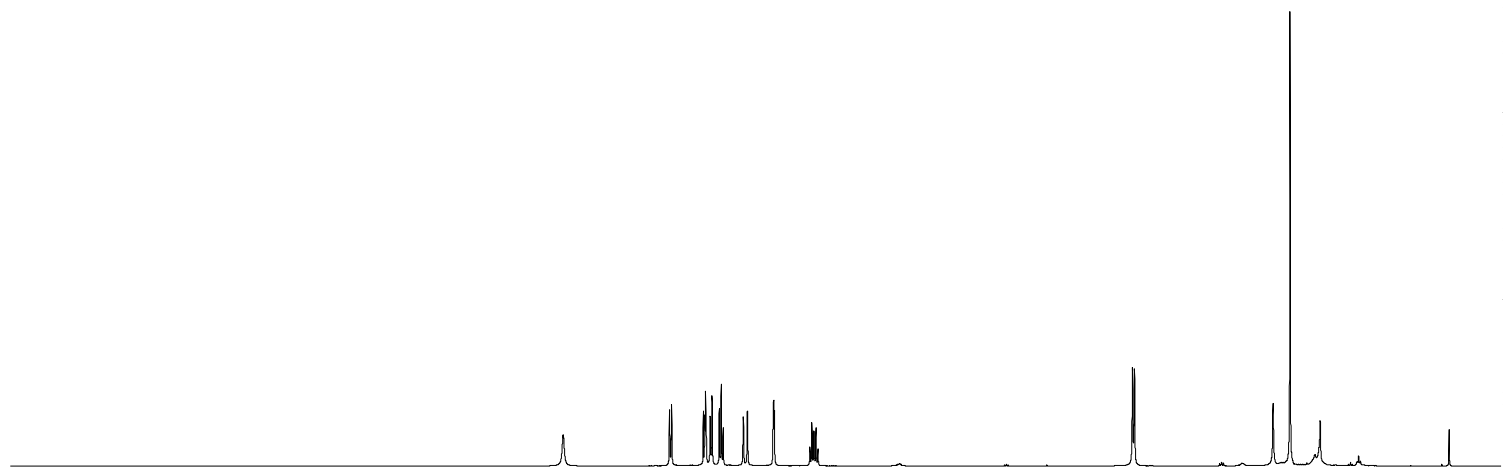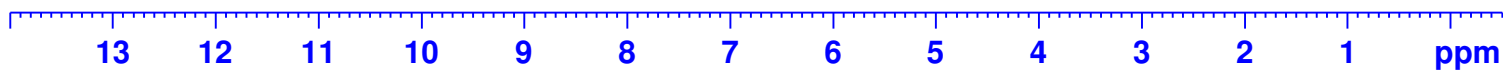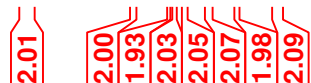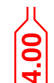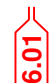

XY-4-20-C

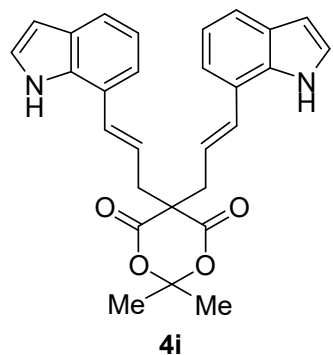

169.17

133.71  
132.64  
128.61  
124.64  
123.03  
120.85  
120.35  
120.20  
120.11  
106.46  
103.14

77.47  
77.15  
76.83

56.48

42.08

29.82

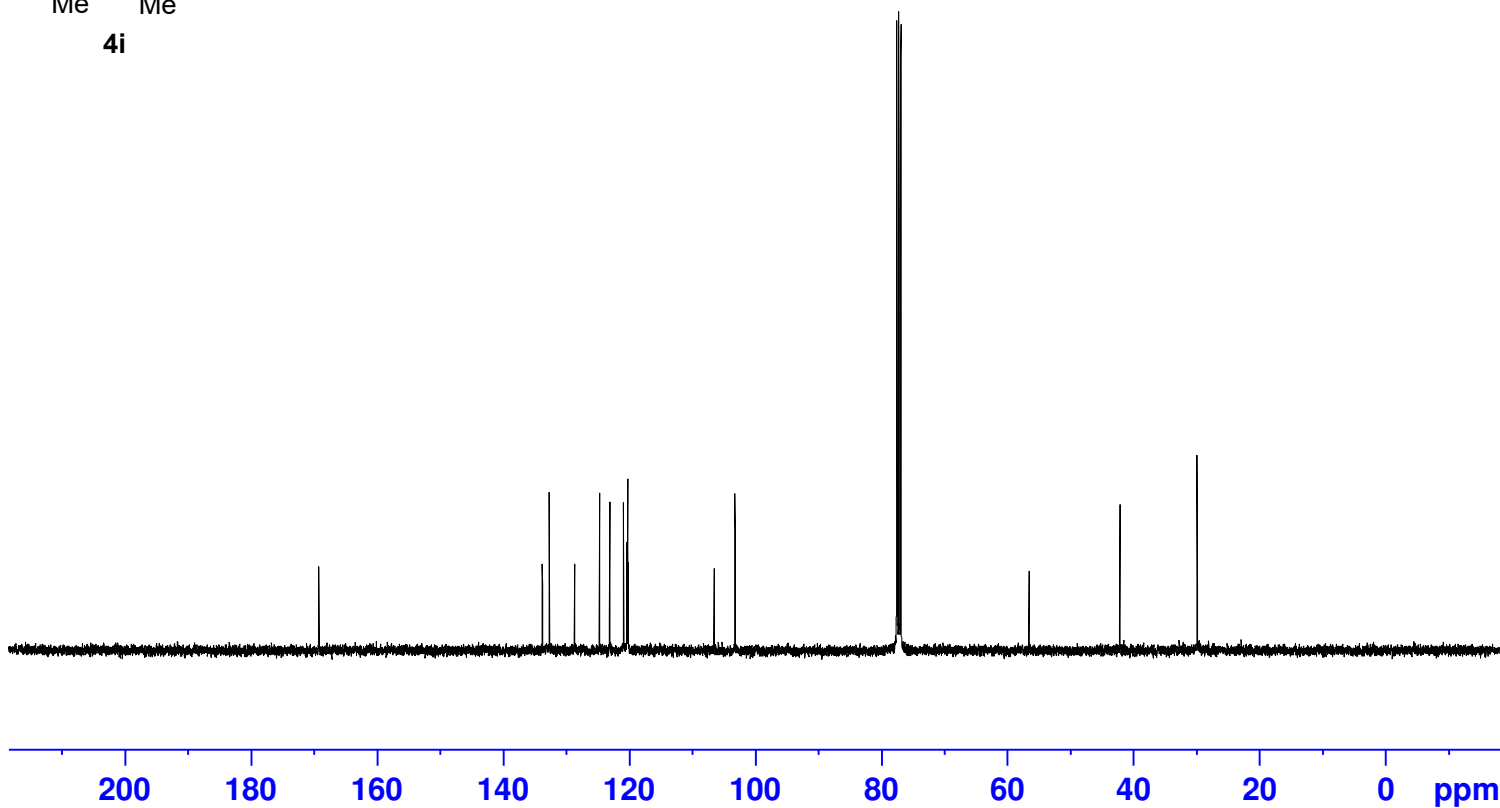

Current Data Parameters  
NAME 2023-6-16-1  
EXPNO 2  
PROCNO 1

F2 - Acquisition Parameters  
Date\_ 20230617  
Time 4.16 h  
INSTRUM Avance  
PROBHD z116098\_0833 (  
PULPROG zgpg30  
TD 65536  
SOLVENT CDC13  
NS 500  
DS 4  
SWH 23809.523 Hz  
FIDRES 0.726609 Hz  
AQ 1.3762560 sec  
RG 47.4244  
DW 21.000 usec  
DE 6.50 usec  
TE 294.7 K  
D1 2.00000000 sec  
D11 0.03000000 sec  
TD0 1  
SFO1 100.6228298 MHz  
NUC1 13C  
P0 3.33 usec  
P1 10.00 usec  
PLW1 87.89900208 W  
SFO2 400.1316005 MHz  
NUC2 1H  
CPDPRG[2] waltz65  
PCPD2 90.00 usec  
PLW2 20.73200035 W  
PLW12 0.25595000 W  
PLW13 0.12874000 W

F2 - Processing parameters  
SI 32768  
SF 100.6127592 MHz  
WDW EM  
SSB 0  
LB 1.00 Hz  
GB 0  
PC 1.40

XY-4-32-H

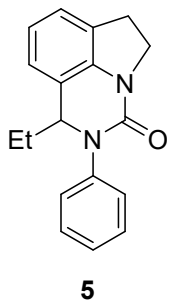

7.429  
7.424  
7.408  
7.395  
7.391  
7.368  
7.365  
7.347  
7.344  
7.296  
7.293  
7.289  
7.275  
7.260  
7.257  
7.133  
7.116  
6.956  
6.937  
6.920  
6.912  
6.895  
4.925  
4.911  
4.898  
4.101  
4.080  
4.058  
3.255  
3.234  
3.213  
1.781  
1.779  
1.766  
1.763  
1.748  
1.730  
0.855  
0.837  
0.818



Current Data Parameters  
NAME 2023-6-26  
EXPNO 1  
PROCNO 1

F2 - Acquisition Parameters  
Date\_ 20230627  
Time 5.34 h  
INSTRUM Avance  
PROBHD z116098\_0833 (  
PULPROG zg30  
TD 65536  
SOLVENT CDC13  
NS 16  
DS 2  
SWH 8196.722 Hz  
FIDRES 0.250144 Hz  
AQ 3.9976959 sec  
RG 85.4993  
DW 61.000 usec  
DE 13.54 usec  
TE 294.4 K  
D1 1.00000000 sec  
TD0 1  
SFO1 400.1324708 MHz  
NUC1 1H  
P0 3.33 usec  
P1 10.00 usec  
PLW1 20.73200035 W

F2 - Processing parameters  
SI 65536  
SF 400.1300102 MHz  
WDW EM  
SSB 0  
LB 0.30 Hz  
GB 0  
PC 1.00

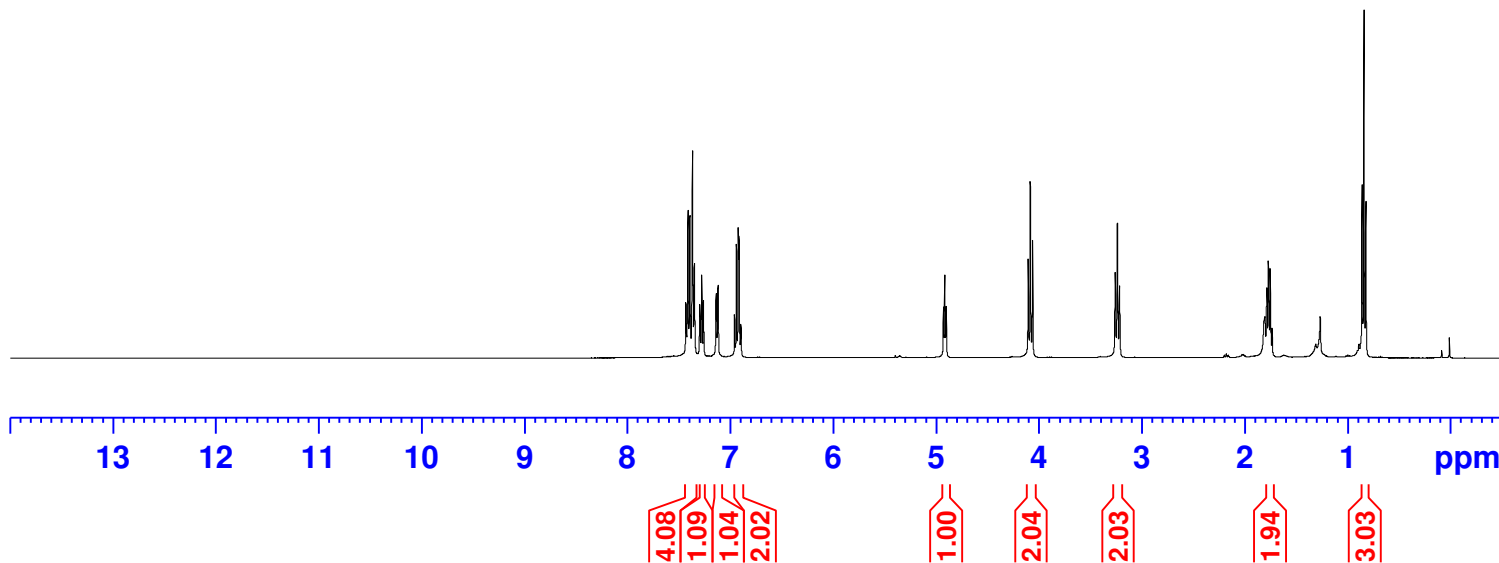

XY-4-32-H

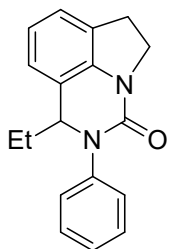

5

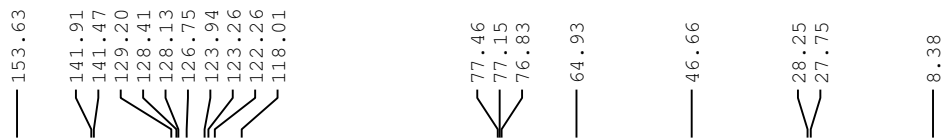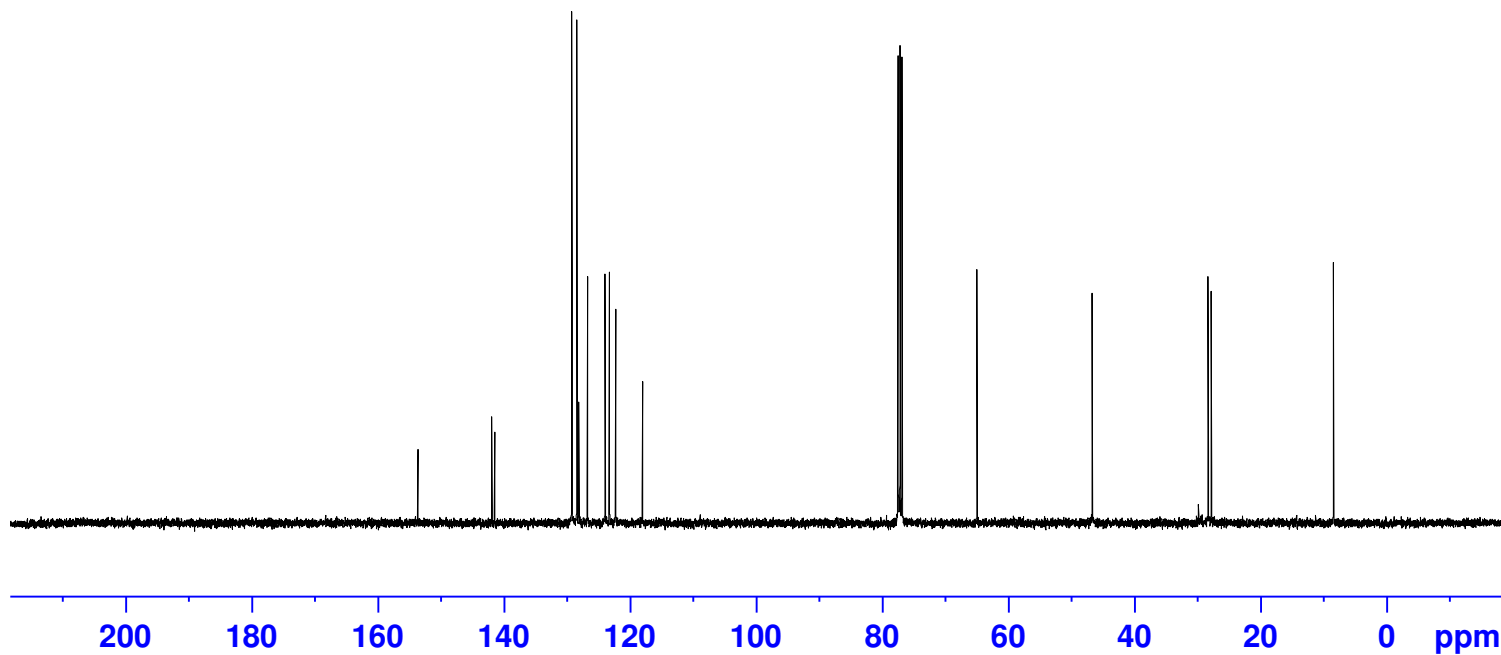

Current Data Parameters  
NAME 2023-6-26  
EXPNO 2  
PROCNO 1

F2 - Acquisition Parameters  
Date\_ 20230627  
Time 5.52 h  
INSTRUM Avance  
PROBHD z116098\_0833 (  
PULPROG zgpg30  
TD 65536  
SOLVENT CDC13  
NS 300  
DS 4  
SWH 23809.523 Hz  
FIDRES 0.726609 Hz  
AQ 1.3762560 sec  
RG 48.6724  
DW 21.000 usec  
DE 6.50 usec  
TE 294.5 K  
D1 2.00000000 sec  
D11 0.03000000 sec  
TD0 1  
SFO1 100.6228298 MHz  
NUC1 13C  
P0 3.33 usec  
P1 10.00 usec  
PLW1 87.89900208 W  
SFO2 400.1316005 MHz  
NUC2 1H  
CPDPRG[2] waltz65  
PCPD2 90.00 usec  
PLW2 20.73200035 W  
PLW12 0.25595000 W  
PLW13 0.12874000 W

F2 - Processing parameters  
SI 32768  
SF 100.6127634 MHz  
WDW EM  
SSB 0  
LB 1.00 Hz  
GB 0  
PC 1.40

XY-4-27-H

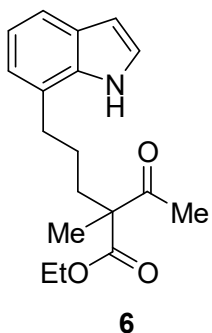

8.368  
7.520  
7.500  
7.260  
7.215  
7.208  
7.201  
7.072  
7.054  
7.035  
6.992  
6.974  
6.564  
6.559  
6.556  
6.551  
4.190  
4.185  
4.172  
4.168  
4.154  
4.150  
4.137  
4.132  
2.869  
2.852  
2.848  
2.831  
2.109  
2.042  
2.029  
2.022  
2.014  
2.008  
2.003  
1.988  
1.915  
1.898  
1.890  
1.881  
1.874  
1.861  
1.840  
1.708  
1.688



Current Data Parameters  
NAME 2023-6-21  
EXPNO 4  
PROCNO 1

F2 - Acquisition Parameters  
Date\_ 20230621  
Time 16.58 h  
INSTRUM Avance  
PROBHD z116098\_0833 (  
PULPROG zg30  
TD 65536  
SOLVENT CDC13  
NS 16  
DS 2  
SWH 8196.722 Hz  
FIDRES 0.250144 Hz  
AQ 3.9976959 sec  
RG 101  
DW 61.000 usec  
DE 13.54 usec  
TE 294.5 K  
D1 1.00000000 sec  
TD0 1  
SFO1 400.1324708 MHz  
NUC1 1H  
P0 3.33 usec  
P1 10.00 usec  
PLW1 20.73200035 W

F2 - Processing parameters  
SI 65536  
SF 400.1300100 MHz  
WDW EM  
SSB 0  
LB 0.30 Hz  
GB 0  
PC 1.00

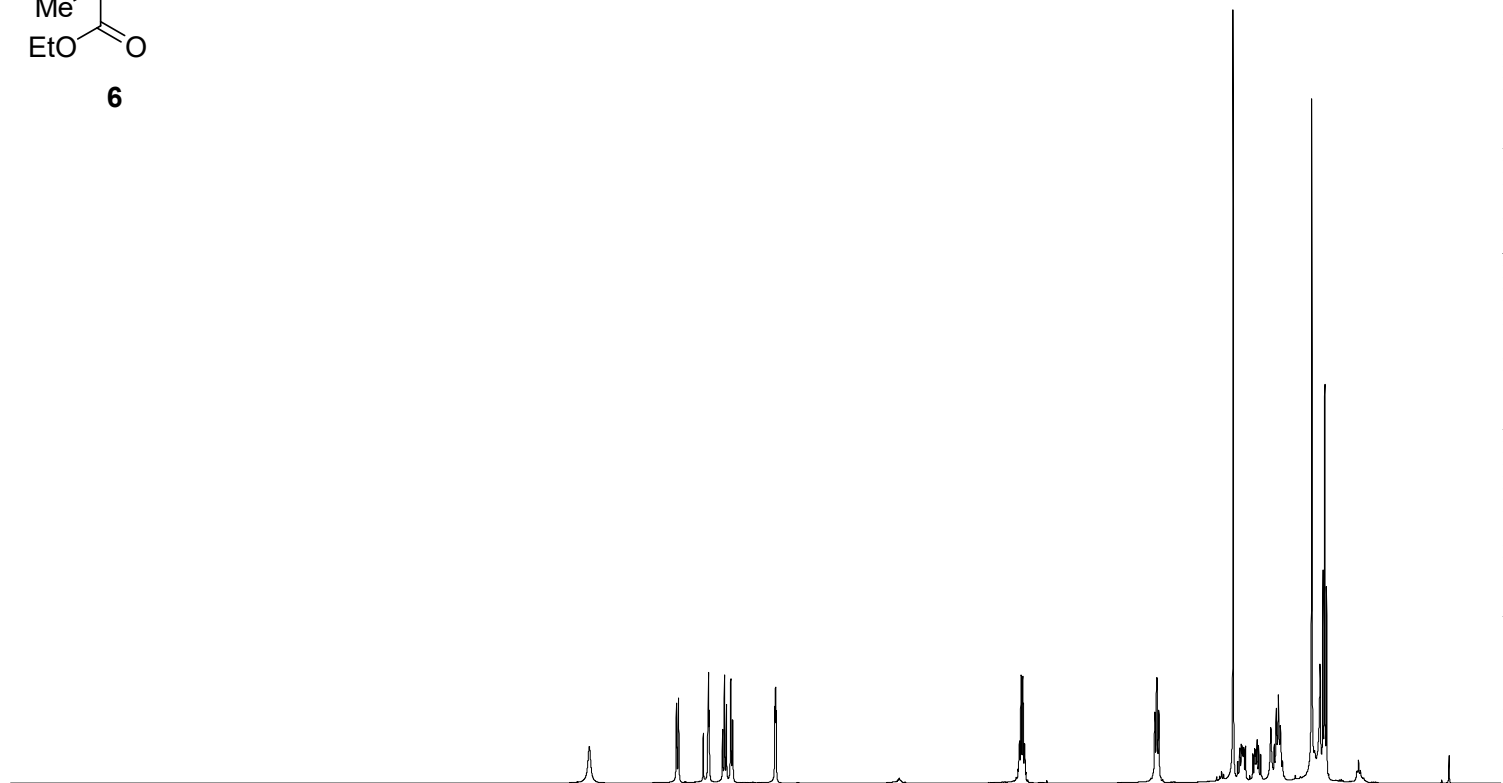

13 12 11 10 9 8 7 6 5 4 3 2 1 ppm

0.97  
1.00  
1.04  
1.07  
1.02  
0.98  
2.13  
2.04  
2.94  
1.12  
1.14  
2.19  
3.05  
3.16

XY-4-27-C

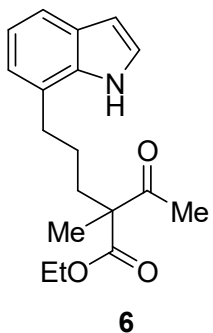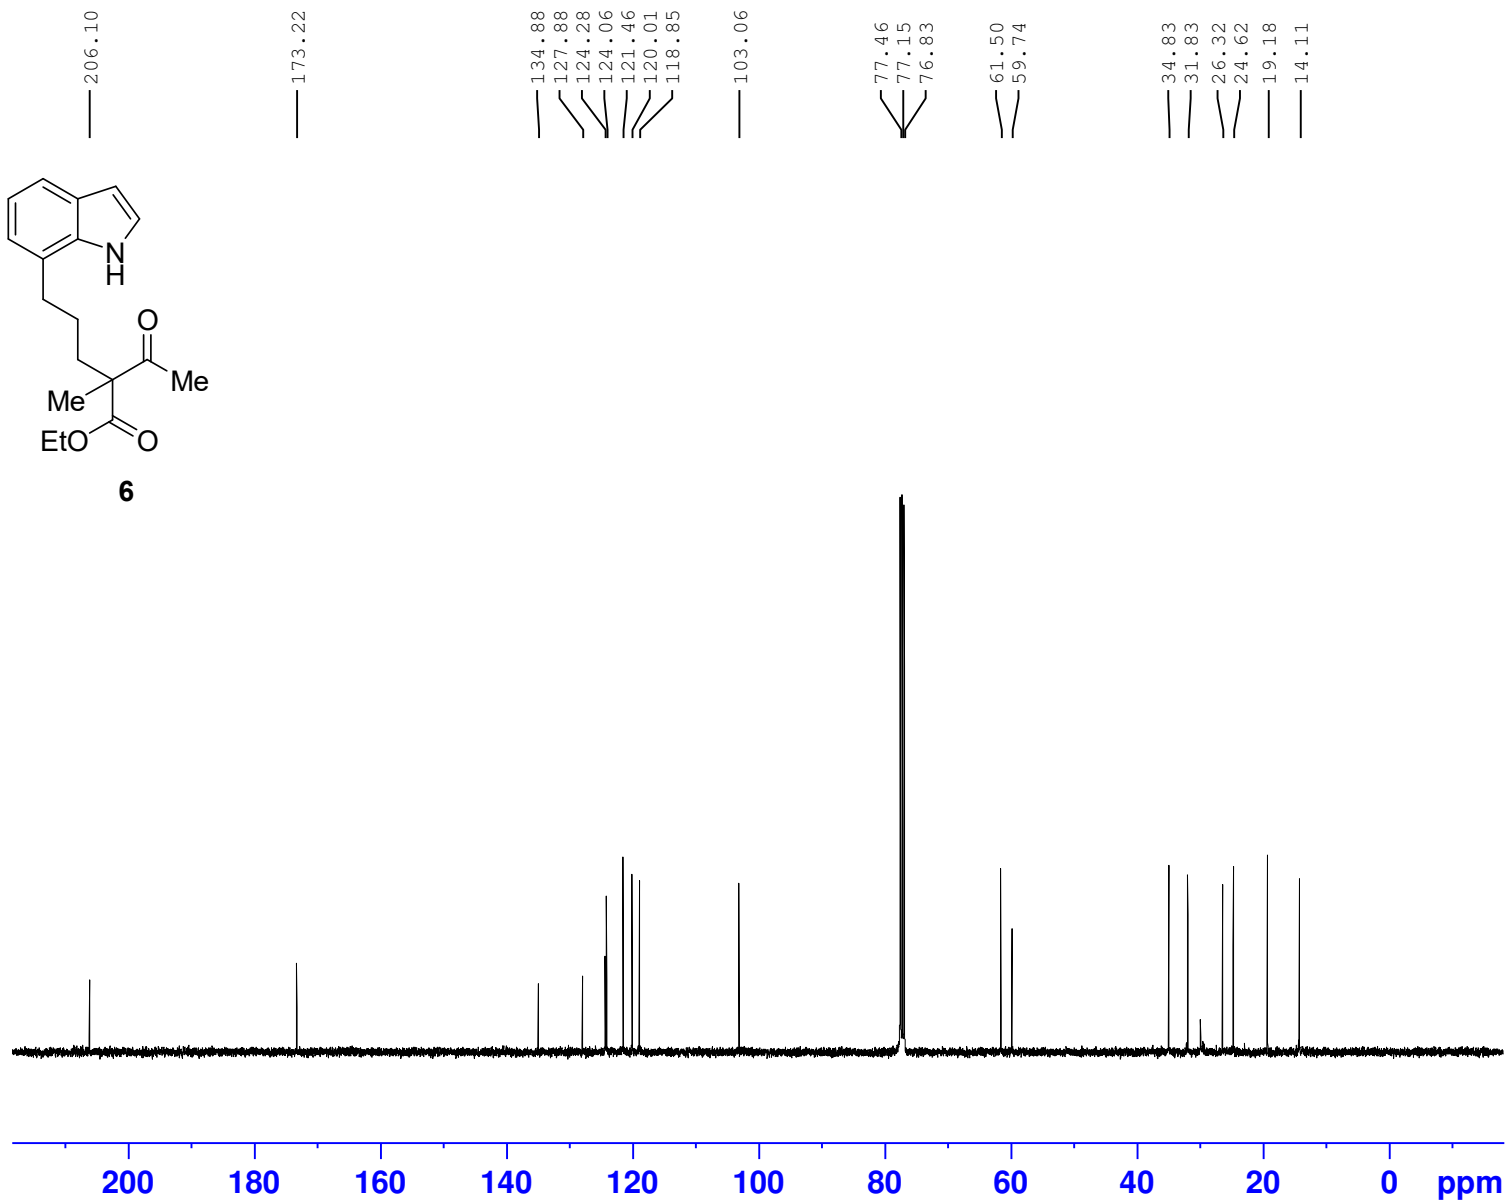

Current Data Parameters  
 NAME 2023-6-21  
 EXPNO 5  
 PROCNO 1

F2 - Acquisition Parameters  
 Date\_ 20230622  
 Time 3.48 h  
 INSTRUM Avance  
 PROBHD z116098\_0833 (  
 PULPROG zgpg30  
 TD 65536  
 SOLVENT CDC13  
 NS 500  
 DS 4  
 SWH 23809.523 Hz  
 FIDRES 0.726609 Hz  
 AQ 1.3762560 sec  
 RG 47.4244  
 DW 21.000 usec  
 DE 6.50 usec  
 TE 294.6 K  
 D1 2.00000000 sec  
 D11 0.03000000 sec  
 TD0 1  
 SFO1 100.6228298 MHz  
 NUC1 13C  
 P0 3.33 usec  
 P1 10.00 usec  
 PLW1 87.89900208 W  
 SFO2 400.1316005 MHz  
 NUC2 1H  
 CPDPRG[2] waltz65  
 PCPD2 90.00 usec  
 PLW2 20.73200035 W  
 PLW12 0.25595000 W  
 PLW13 0.12874000 W

F2 - Processing parameters  
 SI 32768  
 SF 100.6127599 MHz  
 WDW EM  
 SSB 0  
 LB 1.00 Hz  
 GB 0  
 PC 1.40

XY-4-48-H

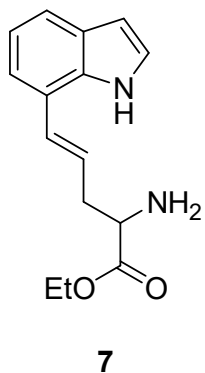

9.120  
7.557  
7.538  
7.260  
7.242  
7.235  
7.228  
7.138  
7.121  
7.088  
7.069  
7.050  
6.810  
6.771  
6.557  
6.552  
6.549  
6.544  
6.210  
6.191  
6.172  
6.152  
6.133  
4.224  
4.220  
4.206  
4.203  
4.188  
4.185  
4.171  
4.167  
3.710  
3.696  
3.682  
2.707  
2.686  
2.673  
2.667  
2.649  
2.631  
1.288  
1.270  
1.253



Current Data Parameters  
NAME 2023-7-6  
EXPNO 1  
PROCNO 1

F2 - Acquisition Parameters  
Date\_ 20230707  
Time 6.11 h  
INSTRUM Avance  
PROBHD z116098\_0833 (  
PULPROG zg30  
TD 65536  
SOLVENT CDC13  
NS 16  
DS 2  
SWH 8196.722 Hz  
FIDRES 0.250144 Hz  
AQ 3.9976959 sec  
RG 101  
DW 61.000 usec  
DE 13.54 usec  
TE 294.5 K  
D1 1.00000000 sec  
TD0 1  
SFO1 400.1324708 MHz  
NUC1 1H  
P0 3.33 usec  
P1 10.00 usec  
PLW1 20.73200035 W

F2 - Processing parameters  
SI 65536  
SF 400.1300098 MHz  
WDW EM  
SSB 0  
LB 0.30 Hz  
GB 0  
PC 1.00

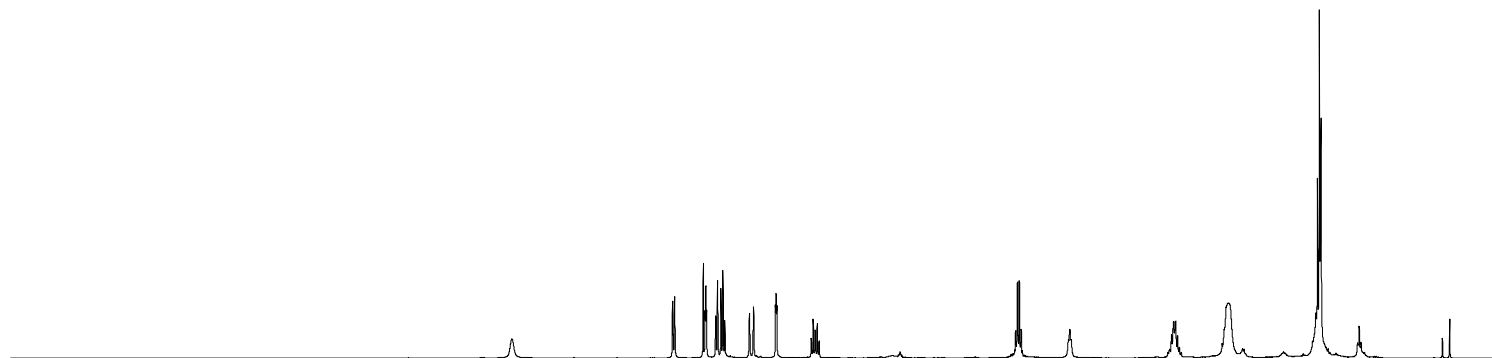

13 12 11 10 9 8 7 6 5 4 3 2 1 ppm

0.93  
1.00  
0.96  
1.00  
1.08  
1.04  
1.00  
1.05  
2.00  
0.94  
2.14  
3.04

XY-4-48-C

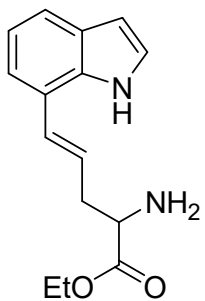

7

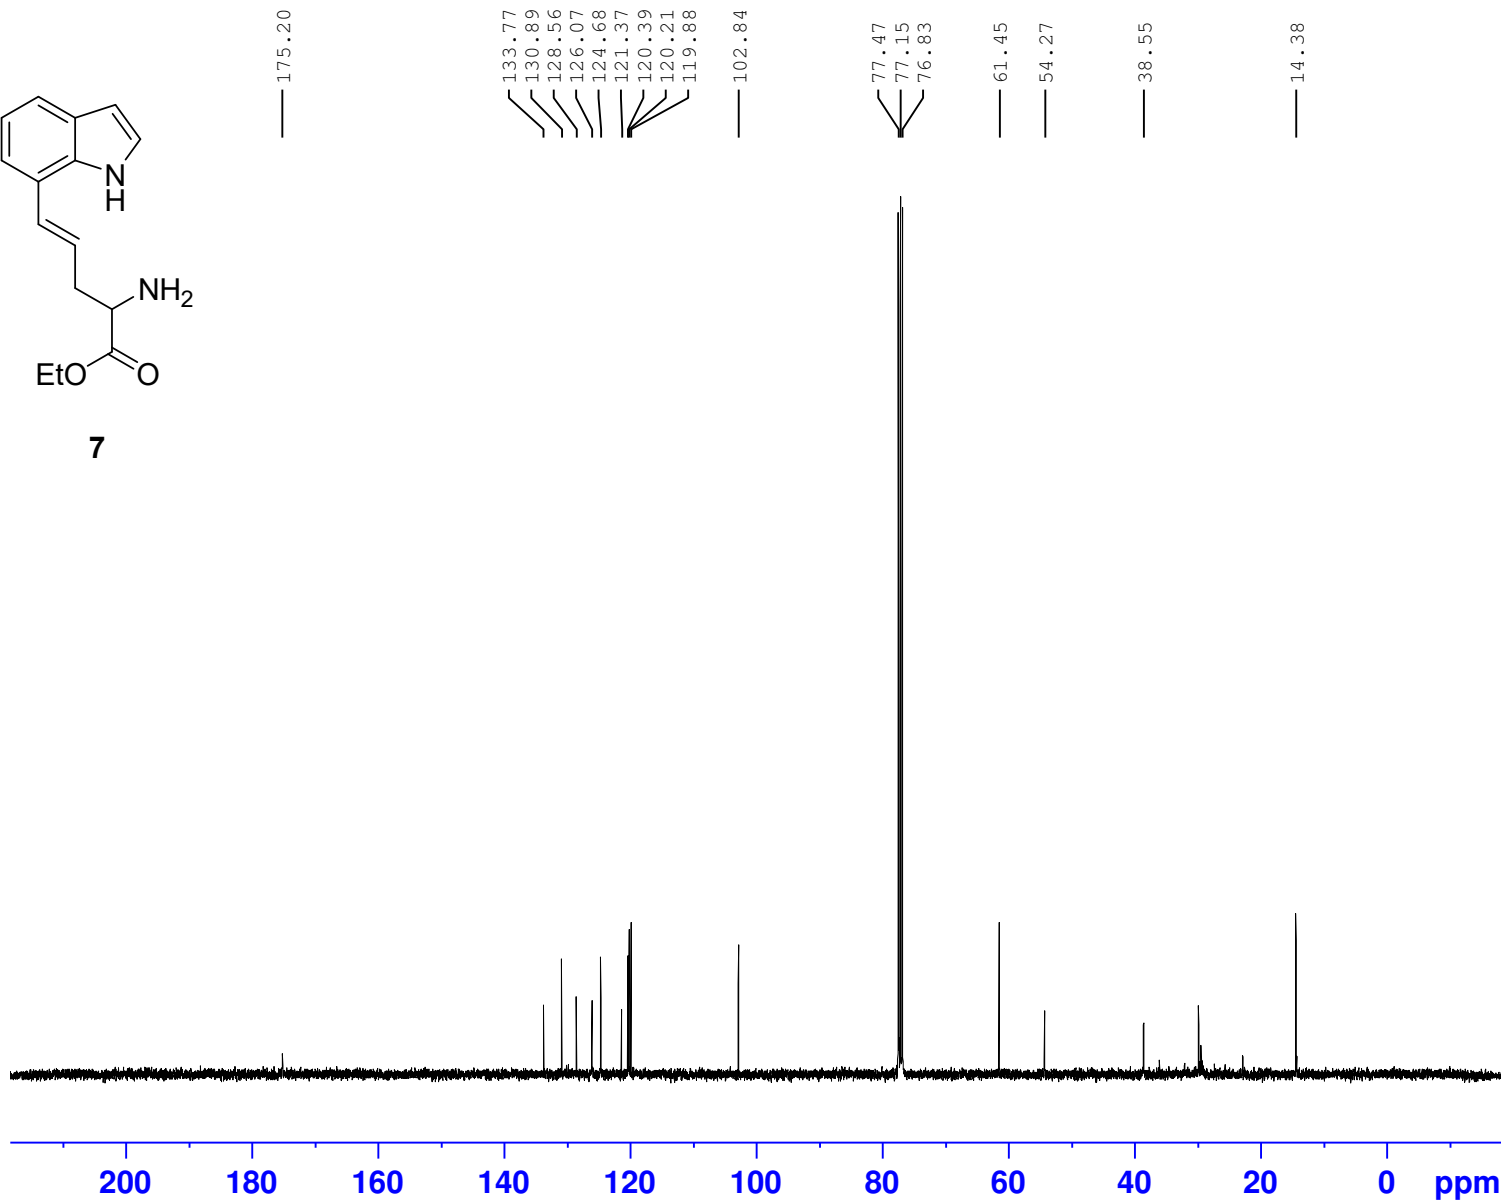

Current Data Parameters  
NAME 2023-7-6  
EXPNO 2  
PROCNO 1

F2 - Acquisition Parameters  
Date\_ 20230707  
Time 6.58 h  
INSTRUM Avance  
PROBHD z116098\_0833 (  
PULPROG zgpg30  
TD 65536  
SOLVENT CDC13  
NS 800  
DS 4  
SWH 23809.523 Hz  
FIDRES 0.726609 Hz  
AQ 1.3762560 sec  
RG 46.5207  
DW 21.000 usec  
DE 6.50 usec  
TE 294.6 K  
D1 2.00000000 sec  
D11 0.03000000 sec  
TD0 1  
SFO1 100.6228298 MHz  
NUC1 13C  
P0 3.33 usec  
P1 10.00 usec  
PLW1 87.89900208 W  
SFO2 400.1316005 MHz  
NUC2 1H  
CPDPRG[2] waltz65  
PCPD2 90.00 usec  
PLW2 20.73200035 W  
PLW12 0.25595000 W  
PLW13 0.12874000 W

F2 - Processing parameters  
SI 32768  
SF 100.6127685 MHz  
WDW EM  
SSB 0  
LB 1.00 Hz  
GB 0  
PC 1.40



XY-4-53-H

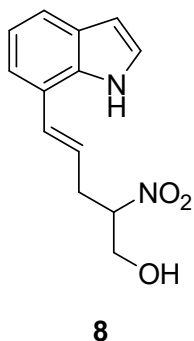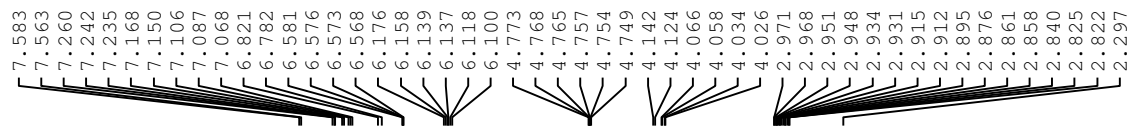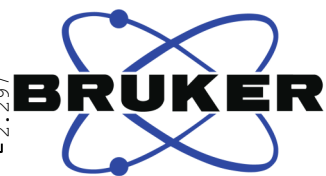

Current Data Parameters  
NAME 2023-7-7  
EXPNO 1  
PROCNO 1

F2 - Acquisition Parameters  
Date\_ 20230707  
Time 21.10 h  
INSTRUM Avance  
PROBHD z116098\_0833 (  
PULPROG zg30  
TD 65536  
SOLVENT CDC13  
NS 24  
DS 2  
SWH 8196.722 Hz  
FIDRES 0.250144 Hz  
AQ 3.9976959 sec  
RG 101  
DW 61.000 usec  
DE 13.54 usec  
TE 294.5 K  
D1 1.00000000 sec  
TD0 1  
SFO1 400.1324708 MHz  
NUC1 1H  
P0 3.33 usec  
P1 10.00 usec  
PLW1 20.73200035 W

F2 - Processing parameters  
SI 65536  
SF 400.1300100 MHz  
WDW EM  
SSB 0  
LB 0.30 Hz  
GB 0  
PC 1.00

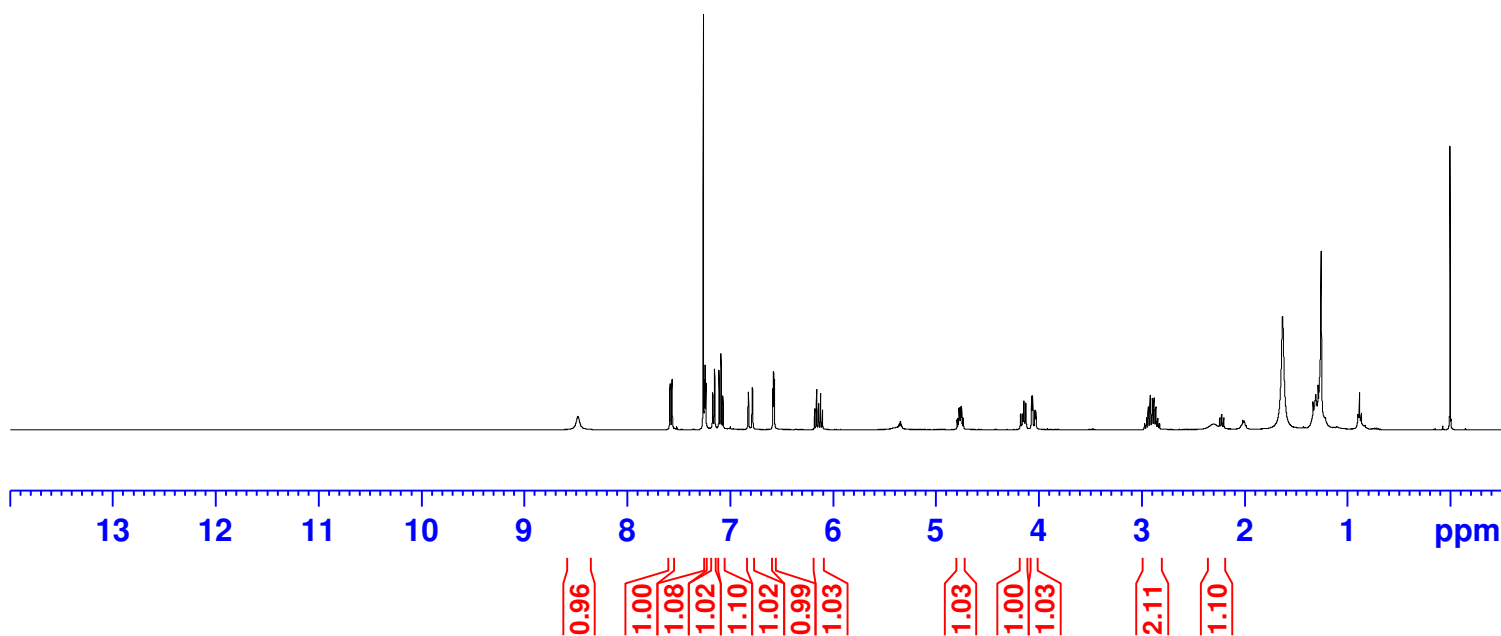

XY-4-56-C

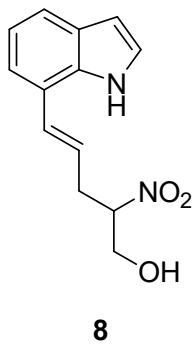

133.632  
131.654  
128.623  
124.602  
123.467  
120.775  
120.534  
120.093  
103.260  
88.766  
77.465  
77.148  
76.830  
62.685  
34.030  
14.263

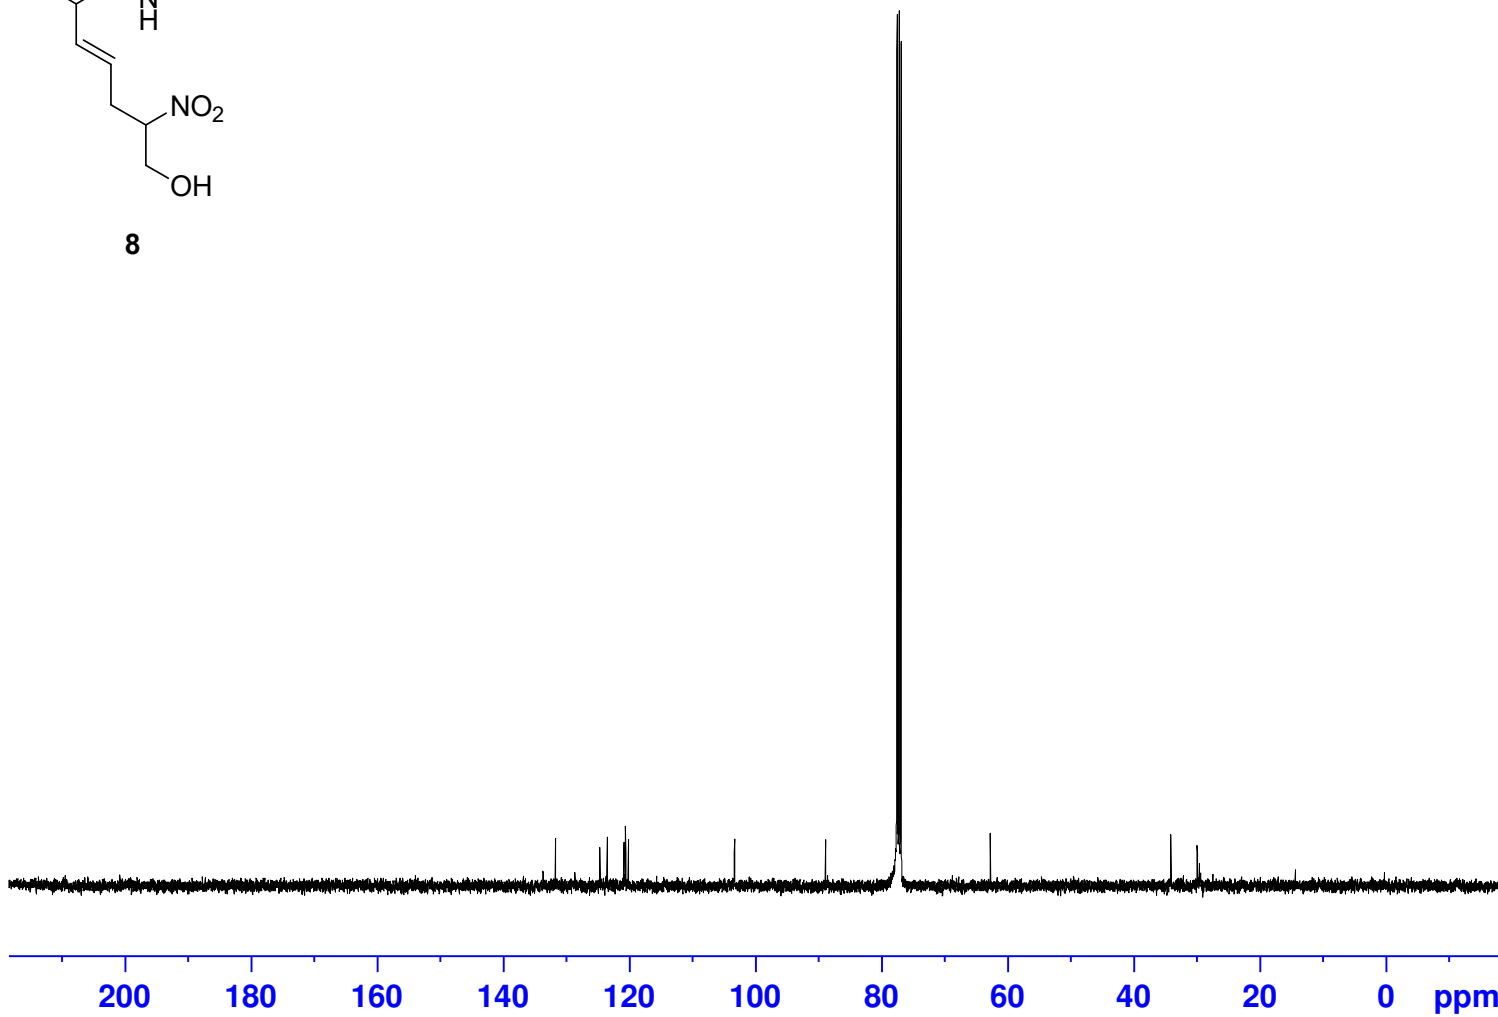

Current Data Parameters  
NAME 2023-7-11  
EXPNO 4  
PROCNO 1

F2 - Acquisition Parameters  
Date\_ 20230712  
Time 7.49 h  
INSTRUM Avance  
PROBHD z116098\_0833 (  
PULPROG zgpg30  
TD 65536  
SOLVENT CDC13  
NS 1024  
DS 4  
SWH 23809.523 Hz  
FIDRES 0.726609 Hz  
AQ 1.3762560 sec  
RG 46.0295  
DW 21.000 usec  
DE 6.50 usec  
TE 294.8 K  
D1 2.00000000 sec  
D11 0.03000000 sec  
TD0 1  
SFO1 100.6228298 MHz  
NUC1 13C  
P0 3.33 usec  
P1 10.00 usec  
PLW1 87.89900208 W  
SFO2 400.1316005 MHz  
NUC2 1H  
CPDPRG[2] waltz65  
PCPD2 90.00 usec  
PLW2 20.73200035 W  
PLW12 0.25595000 W  
PLW13 0.12874000 W

F2 - Processing parameters  
SI 32768  
SF 100.6127571 MHz  
WDW EM  
SSB 0  
LB 1.00 Hz  
GB 0  
PC 1.40
